# Supplementary material for: Reconstruction of the Major Maternal and Paternal Lineages in the Feral New Zealand Kaimanawa Horses
Source: Animals (Basel). 2022 Dec 12;12(24):3508. doi: 10.3390/ani12243508 (PMC9774138; doi:10.3390/ani12243508)
Supplement: Supplementary file 1 [file animals-12-03508-s001.zip › animals-1984019-Supplementary Tables.xlsx]

## Sheet: S1_sample_info
Table S1: Sample information of New Zealand feral KHs (n=96) collected for this study
Lab ID	Species	Feral KH Muster Year	Born on the farm	Sample Type	Coat Color (owner information)	Gender	Age Years (at the sate of sample collection)	Country/ Area Collection
AN_001_2	E. Caballus	2010	-	Mane	Chestnut	Female	14 years	New Zealand / Hawkes Bay
TA_002_1	E. Caballus	2010	-	Tail	Bay	Male	11 years	New Zealand / Hawkes Bay
BR_003_2	E. Caballus	2012	-	Tail	Black	Female	9 years	New Zealand / Hawkes Bay
MI_004_2	E. Caballus	2014	-	Tail	Grey	Female	13 years	New Zealand / Hawkes Bay
SG_005_2	E. Caballus	2014	-	-	Bay	Female	13 years	New Zealand / Hawkes Bay
BO_006_2	E. Caballus	2014	-	Mane	Bay	Female	13 years	New Zealand / Hawkes Bay
PO_007_1	E. Caballus	2014	-	Tail	Bay	Male	7 years	New Zealand / Hawkes Bay
BH_008_1	E. Caballus	2016	-	Tail	Bay	Male	9 years	New Zealand / Hawkes Bay
CH_009_1	E. Caballus	2016	-	Tail	Chestnut	Male	8 years	New Zealand / Hawkes Bay
AR_010_1	E. Caballus	2016	-	Tail	Bay	Male	16 years	New Zealand / Hawkes Bay
TE_011_1	E. Caballus	2018	-	Tail	Chestnut	Male	10 years	New Zealand / Hawkes Bay
BE_012_2	E. Caballus	2018	-	Tail	Bay	Female	7 years	New Zealand / Hawkes Bay
SP_013_2	E. Caballus	2018	-	Tail	Bay	Female	3 years	New Zealand / Hawkes Bay
TB_014_1	E. Caballus	2018	-	Mane	Black	Male	19 years	New Zealand / Hawkes Bay
CA_015_1	E. Caballus	2018	-	Mane	Chestnut	Male	11 years	New Zealand / Hawkes Bay
KO_017_1	E. Caballus	-	2019	Tail	Bay	Male	11 months	New Zealand / Hawkes Bay
D1000262	E. Caballus	2006	-	-	-	Female	-	New Zealand / -
D1000263	E. Caballus	2006	-	-	-	Male	-	New Zealand / -
D1000267	E. Caballus	2006	-	-	-	Male	-	New Zealand / -
LM_029_1	E. Caballus	1998	-	Tail	Chestnut	Male		Kaimanawa Mountains
EL_030_1	E. Caballus	2014	-	Mane	Grey	Male	18-22 years	New Zealand / Northland
CA_031_1	E. Caballus	2018	-	Tail	Bay	Male	13 years	New Zealand / Northland
PA_032_1	E. Caballus	-	2018	Tail	Grey	Male	2 years	New Zealand / Northland
AL_033_1	E. Caballus	2018	-	Tail	Bay	Male	9 years	New Zealand / Northland
MU_034_1	E. Caballus	2018	-	Tail	Bay	Male	8 years	New Zealand / Northland
FE_035_2	E. Caballus	2010	-	Tail	Grey	Female	15 years	New Zealand / Bay of Islands
DE_036_1	E. Caballus	2016	-	Mane	Bay	Male	6 years	New Zealand/ -
TB_037_1	E. Caballus	2018	-	Mane	Black	Male	9 years	New Zealand / Northland
KO_038_1	E. Caballus	-	2018	Tail	Chestnut	Male	2 years 1 month	New Zealand / Whangarei
SA_039_2	E. Caballus	-	-	Tail	Chestnut	Female	15 years	New Zealand / Northland
SU_040_2	E. Caballus	2018	-	Tail	Chestnut	Female	3 years 1 month	New Zealand / Northland
FL_041_1	E. Caballus	-	2018	Mane	Chestnut	Male	2 years	New Zealand / Northland
GA_042_1	E. Caballus	2018	-	Tail	Chestnut	Male	14-16 years	New Zealand / Dargaville
AB_043_2	E. Caballus	2014	-	Tail	Black	Female	7 years	New Zealand / Dargaville
SH_044_1	E. Caballus		-	Tail	Tan	Male	18 years	New Zealand / Dargaville
SM_045_2	E. Caballus	2001	-	Tail	Bay	Female	20 years	New Zealand / Wairarapa
ZO_046_1	E. Caballus	1997	-	Tail	Bay	Male	24 years	New Zealand / Wairarapa
KA_047_2	E. Caballus	-	2012	Mane	Bay	Female	7 years 1 month	New Zealand / Wairarapa
AU_049_2	E. Caballus	2018	-	Mane	Chestnut	Female	4 years	Nea Zealand / Auckland
LE_050_1	E. Caballus	-	2018	Tail	Chestnut	Male	1 year 11 months	New Zealand / Hastings Hawkes Bay
RO_051_2	E. Caballus	2005	-	Mane	Bay	Female	16 years	New Zealand / Hastings Hawkes Bay
BE_052_1	E. Caballus	2006	-	Tail	Grey	Male	15 years	New Zealand / Hastings Hawkes Bay
BE_053_2	E. Caballus	2019	-	Tail	Chesnut	Female	2 years 3 months	New Zealand / Bulls Rangitikei
CA_054_2	E. Caballus	2018	-	Tail	Bay	Female	4 years	New Zealand / Bulls Rangitikei
AN_055_2	E. Caballus	-	-	Mane	Bay	Female	10 years	Nea Zealand / Kimbolton
PH_056_2	E. Caballus	2019	-	Tail	Bay	Female	3 years 10 months	Nea Zealand / Upper Hutt, Wellington
NU_057_1	E. Caballus	-	2019	Tail	Bay	Male	9 months	Nea Zealand / Upper Hutt, Wellington
RA_059_1	E. Caballus	-	2019	Tail	Chestnut	Male	10 months	Nea Zealand / Upper Hutt, Wellington
HE_061_1	E. Caballus	2018	-	Tail	Bay	Male	2 years 8 months	Nea Zealand / Upper Hutt, Wellington
FI_062_2	E. Caballus	2018	-	Mane	Bay	Female	10 years 9 months	Nea Zealand / Upper Hutt, Wellington
KA_063_2	E. Caballus	2007	-	Tail	Bay	Female	13 years 11 months	Nea Zealand / Upper Hutt, Wellington
CR_064_1	E. Caballus	2018	-	Tail	Chestnut	Male	8 years	Nea Zealand / Levin
KI_065_2	E. Caballus	2001	-	Tail	Black	Female	20 years	New Zealand / Levin
TR_066_2	E. Caballus	-	-	Tail	Bay	Female	9 years	New Zealand / Levin
QU-067_2	E. Caballus	2008	-	Tail	Bay	Female	14 years	New Zealand / Levin
PR_068_2	E. Caballus	2012	-	Tail	Bay	Female	13-14 years	New Zealand / Levin
MS_069_2	E. Caballus	2012	-	Tail	-	Female	9 years	New Zealand / Auckland
KH_070_2	E. Caballus	2004	-	Tail	Chestnut	Female	17 years	Nea Zealand / Otorohanga
PH_072_1	E. Caballus	2006	-	Tail	Bay	Male	16 years	Nea Zealand / Nelson
RO_073_1	E. Caballus	2018	-	Tail	Bay	Male	3 years 2-3 months	Nea Zealand / Auckland
GI_074_2	E. Caballus	2014	-	Tail	Bay	Female	7 years 3 month	Nea Zealand / Whakatane bop
LI_075_2	E. Caballus	1993	-	Tail	Chestnut	Female	28 years	Nea Zealand / Waikato te poi
EC_076_1	E. Caballus	-	1993	Tail	Chestnut	Male	15 years	New Zealand / Auckland
LI_077_2	E. Caballus	2012	-	Tail	Chestnut	Female	11 years	New Zealand / Auckland
EL_078_2	E. Caballus	-	2006	Tail	Chestnut	Female	14 years	New Zealand / Northland Ararva
ST_079_1	E. Caballus	1997	-	Tail	Bay	Male	24 years	Nea Zealand / North Taranaki Ahititi
SE_080_1	E. Caballus	1997	-	Tail	Bay	Male	24 years	Nea Zealand / North Taranaki Ahititi
CO_081_1	E. Caballus	1997	-	Tail	Black	Male	24 years	Nea Zealand / North Taranaki Ahititi
FO_082_2	E. Caballus	-	1997	Tail	Chestnut	Female	23 years	Nea Zealand / North Taranaki Ahititi
BU_083_2	E. Caballus	-	1991	Tail	Chestnut	Female	23 years	Nea Zealand / North Taranaki Ahititi
WH_084_2	E. Caballus	-	2001	Tail	Dun	Female	19-20	Nea Zealand / North Taranaki Ahititi
RA_085_2	E. Caballus	2018	-	Tail	Chestnut	Female	13-14 years	Nea Zealand / Karekare Auckland
BL_086_2	E. Caballus	1998	-	Tail	Chestnut	Female	40 years	New Zealand / Far North, Kaitaia 0410
DR_087_2	E. Caballus	2018	-	Tail	Bay	Female	5 years	New Zealand/ Palmerston North
DD_088_1	E. Caballus		2018	Tail	Bay	Male	2 years	New Zealand/ Palmerston North
MA_090_2	E. Caballus	2018	-	Tail	Bay	Female	5 years	New Zealand / south Island/ Balclutha, South Otago
GU_091_2	E. Caballus	2019	-	Mane	Grey	Female	8 years	New Zealand / Burnham, Chrischurch
GA_093_1	E. Caballus	2019	-	Mane	Chestnut	Male	3 years	New Zealand / Burnham, Chrischurch
GY_094_2	E. Caballus	2016	-	Tail	Bay	Female	14 years	New Zealand / Northland
SH_096_2	E. Caballus	2019	-	Tail	Bay	Female	2 years	New Zealand / Northland
BR_097_1	E. Caballus	2000	-	Tail	Bay	Male	20 years	New Zealand / Northland
CI_098_2	E. Caballus	2009	-	Tail	Bay	Female	13 years	Nea Zealand / Cambridge, Waikato
EI_099_2	E. Caballus	2018	-	Tail	Chestnut	Female	4 year 4 months	Nea Zealand / Cambridge, Waikato
AR_100_1	E. Caballus	2010	-	Tail	Chestnut	Male	11 years	New Zealand / Waikato
BE_101_1	E. Caballus	2006	-	Tail	Bay	Male	15 years	New Zealand / Manawatu
RO_102_1	E. Caballus	-	2012	Tail	Bay	Male	8 years 2 months	New Zealand
NG_103_2	E. Caballus	2018	-	Tail	Chestnut	Female	6 years	New Zealand / Chambrige
LU_104_2	E. Caballus	2019	-	Tail	Bay	Female	3 years 6 months	New Zealand/ Wellington
MI_106_2	E. Caballus	2010	-	Tail	Chestnut	Female	1 year	New Zealand / Otaki Gorge
BR_107_1	E. Caballus	2009	-	Tail	Chestnut	Male	12-13 years	New Zealand / Otaika, Northlans
PI_108_2	E. Caballus	-	2014	Tail	Bay	Female	6 years 2 months	New Zealand / Taupo
LP_109_2	E. Caballus	2008	-	Tail	Bay	Female	12 years	New Zealand / Auckland
BR_110_1	E. Caballus	2018	-	Mane	Bay	Male	6 years	New Zealand
KY_112_2	E. Caballus	-	2016	Tail	Grey	Female	4 years, 6 months	New Zealand
CI_113_2	E. Caballus	2004	-	Mane	Chestnut	Female	19 years	New Zealand / Raglan, North Island
PE_114-2	E. Caballus	1997	-	Mane	Bay	Female	24 years	New Zealand / Raglan, North Island

## Sheet: S2_related_indv
Table S2: Information on the relatedness among KHs. In case the related individuals harbor the same haplogroup, one sample in each pair was retained (green color), and one (orange color) was removed from data analysis
Y-chr analysis
Sample_1	Sample_1_HPG	Sample_2	Sample_2_HPG	Phi-hat	Comment
BH_008_1	Ao-aD	CA_031_1	Ao-aD	0.285
CH_009_1	Ao-aD	DE_036_1	Ao-aD	0.5881
TE_011_1	Ad-b	CA_015_1	Ad-b	0.275
TE_011_1	Ad-b	KO_038_1	Ad-b	0.3007
TE_011_1	Ad-b	FL_041_1	Ad-b	0.5715
TE_011_1	Ad-b	LE_050_1	Ad-b	0.2602
KO_017_1	Tb-o	NU_057_1	Tb-o	0.2771
CA_031_1	Ao-aD	BR_110_1	Ao-aD	0.2617
KO_038_1	Ad-b	RO_073_1	Ad-b	0.2853
GA_042_1	Tb-o	NU_057_1	Tb-o	0.3069
GA_042_1	Tb-o	BR_107_1	Ad-b	0.3505	Here both individuals were kept as they belong to different haplotypes
RA_059_1	Ad-b	GA_093_1	Ad-b	0.3764
HE_061_1	Ad-b	RO_073_1	Ad-b	0.3411
mt-DNA analysis
Sample_1	Sample_1_HPG	Sample_2	Sample_2_HPG	Phi-hat	Comment
AN_001_2	A	TA_002_1	A	0.5454
AU_049_2	G	FL_041_1	G	0.3215
BE_053_2	P	RA_085_2	P	0.2605
BH_008_1	P	CA_031_1	P	0.2876
BO_006_2	P	SP_013_2	P	0.3218
CA_031_1	P	BR_110_1	P	0.2646
CA_054_2	G	RA_059_1	G	0.2563
CH_009_1	P	DE_036_1	P	0.5896
DR_087_2	P	DD_088_1	P	0.5
EI_099_2	G	FL_041_1	G	0.352
EI_099_2	G	TE_011_1	G	0.5283
FO_082_2	G	ZO_046_1	G	0.2613
GA_042_1	G	BR_107_1	G	0.3466
GA_042_1	G	NU_057_1	G	0.3076
GU_091_2	P	KY_112_2	P	0.5581
HE_061_1	G	RO_073_1	G	0.3359
KA_047_2	G	PR_068_2	G	0.549
KA_063_2	G	MA_090_2	G	0.2648
KO_017_1	P	NU_057_1	G	0.2729	Here both individuals were kept as they belong to different haplotypes
KO_038_1	G	RO_073_1	G	0.2802
LI_075_2	G	EC_076_1	G	0.5804
LI_077_2	G	HE_061_1	G	0.2816
LI_077_2	G	RO_073_1	G	0.3234
MI_004_2	P	EL_030_1	P	0.5529
MI_106_2	P	CH_009_1	P	0.3494
MI_106_2	P	DE_036_1	P	0.3604
PH_056_2	G	GA_042_1	G	0.5717
PH_056_2	G	NU_057_1	G	0.5
PH_056_2	G	SH_096_2	G	0.4403
RA_059_1	G	GA_093_1	G	0.3737
RA_085_2	P	BH_008_1	P	0.263
RA_085_2	P	CH_009_1	P	0.3079
RA_085_2	P	DE_036_1	P	0.3105
SG_005_2	G	AR_010_1	G	0.4579
SH_096_2	G	BR_107_1	G	0.2772
SH_096_2	G	GA_042_1	G	0.5562
SP_013_2	P	CR_064_1	P	0.2864
TE_011_1	G	CA_015_1	G	0.2683
TE_011_1	G	FL_041_1	G	0.5681
TE_011_1	G	KO_038_1	G	0.2965
TE_011_1	G	LE_050_1	G	0.2555

## Sheet: S3_mtDNA_data
Table S3: Information on 1,081 mtDNA SNPs genotyped in KHs (n=93) and retrieved from global modern horse dataset (n=81) [20]
Variant Details				Kaimanawa Horses
SNP Name	Position	REF	ALT	AN_001_2	BR_003_2	MI_004_2	SG_005_2	BO_006_2	BE_012_2	SP_013_2	FE_035_2	SA_039_2	SU_040_2	AB_043_2	SM_045_2	KA_047_2	AU_049_2	RO_051_2	BE_053_2	CA_054_2	AN_055_2	PH_056_2	FI_062_2	KA_063_2	KI_065_2	TR_066_2	QU-067_2	PR_068_2	MS_069_2	KH_070_2	GI_074_2	LI_075_2	LI_077_2	EL_078_2	FO_082_2	BU_083_2	RA_085_2	BL_086_2	DR_087_2	MA_090_2	GU_091_2	GY_094_2	SH_096_2	CI_098_2	EI_099_2	NG_103_2	LU_104_2	MI_106_2	PI_108_2
MT-17-A-G-no-rs	17	A	G	A	A	A	A	A	A	A	A	A	A	A	A	A	A	A	A	A	A	A	A	A	A	A	A	A	A	A	A	A	A	A	A	A	A	A	A	A	A	A	A	A	A	A	A	A	A
MT-57-T-C-no-rs	57	T	C	T	T	T	T	T	T	T	T	T	T	T	T	T	T	T	T	T	T	T	T	T	T	T	T	T	T	T	T	T	T	T	T	T	T	T	T	T	T	T	T	T	T	T	T	T	T
MT-77-C-T-no-rs	77	C	T	C	C	C	C	C	C	C	C	C	C	C	C	C	C	C	C	C	C	C	C	C	C	C	C	C	C	C	C	C	C	C	C	C	C	C	C	C	C	C	C	C	C	C	C	C	C
MT-86-A-G-no-rs	86	A	G	A	A	A	A	A	A	A	A	A	A	A	A	A	A	A	A	A	A	A	A	A	A	A	A	A	A	A	A	A	A	A	A	A	A	A	A	A	A	A	A	A	A	A	A	A	A
MT-198-G-C-no-rs	198	G	C	G	G	G	G	G	G	G	G	G	G	G	G	G	G	G	G	G	G	G	G	G	G	G	G	G	G	G	G	G	G	G	G	G	G	G	G	G	G	G	G	G	G	G	G	G	G
MT-218-T-C-no-rs	218	T	C	T	T	T	T	T	T	T	T	T	T	T	T	T	T	T	T	T	T	T	T	T	T	T	T	T	T	T	T	T	T	T	T	T	T	T	T	T	T	T	T	T	T	T	T	T	T
MT-222-C-T-no-rs	222	C	T	C	T	C	T	C	C	C	C	T	T	T	T	T	T	T	C	T	C	T	T	T	C	T	C	T	C	C	C	T	T	C	T	T	C	T	C	T	C	T	T	T	T	T	T	C	C
MT-223-A-G-no-rs	223	A	G	A	A	A	A	A	A	A	A	A	A	A	A	A	A	A	A	A	A	A	A	A	A	A	A	A	A	A	A	A	A	A	A	A	A	A	A	A	A	A	A	A	A	A	A	A	A
MT-267-G-A-no-rs	267	G	A	G	G	G	G	G	G	G	G	G	G	G	G	G	G	G	G	G	G	G	G	G	G	G	G	G	G	G	G	G	G	G	G	G	G	G	G	G	G	G	G	G	G	G	G	G	G
MT-278-C-T-no-rs	278	C	T	C	C	C	C	C	C	C	C	C	C	C	C	C	C	C	C	C	C	C	C	C	C	C	C	C	C	C	C	C	C	C	C	C	C	C	C	C	C	C	C	C	C	C	C	C	C
MT-302-T-C-no-rs	302	T	C	T	T	T	T	T	T	T	T	T	T	T	T	T	T	T	T	T	T	T	T	T	T	T	T	T	T	T	T	T	T	T	T	T	T	T	T	T	T	T	T	T	T	T	T	T	T
MT-339-T-C-no-rs	339	T	C	T	T	T	T	T	T	T	T	T	T	T	T	T	T	T	T	T	T	T	T	T	T	T	T	T	T	T	T	T	T	T	T	T	T	T	T	T	T	T	T	T	T	T	T	T	T
MT-341-A-G-no-rs	341	A	G	A	A	A	A	A	A	A	A	A	A	A	A	A	A	A	A	A	A	A	A	A	A	A	A	A	A	A	A	A	A	A	A	A	A	A	A	A	A	A	A	A	A	A	A	A	A
MT-348-T-C-no-rs	348	T	C	T	T	T	T	T	T	T	T	T	T	T	T	T	T	T	T	T	T	T	T	T	T	T	T	T	T	T	T	T	T	T	T	T	T	T	T	T	T	T	T	T	T	T	T	T	T
MT-358-T-C-no-rs	358	T	C	T	T	T	T	T	T	T	T	T	T	T	T	T	T	T	T	T	T	T	T	T	T	T	T	T	T	T	T	T	T	T	T	T	T	T	T	T	T	T	T	T	T	T	T	T	T
MT-369-G-A-no-rs	369	G	A	G	G	G	G	G	G	G	G	G	G	G	G	G	G	G	G	G	G	G	G	G	G	G	G	G	G	G	G	G	G	G	G	G	G	G	G	G	G	G	G	G	G	G	G	G	G
MT-383-A-C-no-rs	383	A	C	A	A	A	A	A	A	A	A	A	A	A	A	A	A	A	A	A	A	A	A	A	A	A	A	A	A	A	A	A	A	A	A	A	A	A	A	A	A	A	A	A	A	A	A	A	A
MT-408-G-A-no-rs	408	G	A	G	G	G	G	G	G	G	G	G	G	G	G	G	G	G	G	G	G	G	G	G	G	G	G	G	G	G	G	G	G	G	G	G	G	G	G	G	G	G	G	G	G	G	G	G	G
MT-409-T-C-no-rs	409	T	C	T	T	T	T	T	T	T	T	T	T	T	T	T	T	T	T	T	T	T	T	T	T	T	T	T	T	T	T	T	T	T	T	T	T	T	T	T	T	T	T	T	T	T	T	T	T
MT-415-C-T-no-rs	415	C	T	C	T	C	T	C	C	C	C	T	T	T	T	T	T	T	C	T	C	T	T	T	C	T	C	T	C	C	C	T	T	C	T	T	C	T	C	T	C	T	T	T	T	T	T	C	C
MT-431-C-T-no-rs	431	C	T	C	C	C	C	C	C	C	C	C	C	C	C	C	C	C	C	C	C	C	C	C	C	C	C	C	C	C	C	C	C	C	C	C	C	C	C	C	C	C	C	C	C	C	C	C	C
MT-443-G-A-no-rs	443	G	A	G	G	G	G	G	G	G	G	G	G	G	G	G	G	G	G	G	G	G	G	G	G	G	G	G	G	G	G	G	G	G	G	G	G	G	G	G	G	G	G	G	G	G	G	G	G
MT-463-T-C-no-rs	463	T	C	T	T	T	T	T	T	T	T	T	T	T	T	T	T	T	T	T	T	T	T	T	T	T	T	T	T	T	T	T	T	T	T	T	T	T	T	T	T	T	T	T	T	T	T	T	T
MT-473-T-C-no-rs	473	T	C	T	T	T	T	T	T	T	T	T	T	T	T	T	T	T	T	T	T	T	T	T	T	T	T	T	T	T	T	T	T	T	T	T	T	T	T	T	T	T	T	T	T	T	T	T	T
MT-488-A-G-no-rs	488	A	G	A	A	A	A	A	A	A	A	A	A	A	A	A	A	A	A	A	A	A	A	A	A	A	A	A	A	A	A	A	A	A	A	A	A	A	A	A	A	A	A	A	A	A	A	A	A
MT-531-T-C-no-rs	531	T	C	T	T	T	T	T	T	T	T	T	T	T	T	T	T	T	T	T	T	T	T	T	T	T	T	T	T	T	T	T	T	T	T	T	T	T	T	T	T	T	T	T	T	T	T	T	T
MT-541-T-C-no-rs	541	T	C	T	T	T	T	T	T	T	T	T	T	T	T	T	T	T	T	T	T	T	T	T	T	T	T	T	T	T	T	T	T	T	T	T	T	T	T	T	T	T	T	T	T	T	T	T	T
MT-546-C-T-no-rs	546	C	T	C	C	C	C	C	C	C	C	C	C	C	C	C	C	C	C	C	C	C	C	C	C	C	C	C	C	C	C	C	C	C	C	C	C	C	C	C	C	C	C	C	C	C	C	C	C
MT-637-A-G-no-rs	637	A	G	A	A	A	A	A	A	A	A	A	A	A	A	A	A	A	A	A	A	A	A	A	A	A	A	A	A	A	A	A	A	A	A	A	A	A	A	A	A	A	A	A	A	A	A	A	A
MT-724-G-A-no-rs	724	G	A	G	G	G	G	G	G	G	G	G	G	G	G	G	G	G	G	G	G	G	G	G	G	G	G	G	G	G	G	G	G	G	G	G	G	G	G	G	G	G	G	G	G	G	G	G	G
MT-737-A-T-no-rs	737	A	T	A	A	A	A	A	A	A	A	A	A	A	A	A	A	A	A	A	A	A	A	A	A	A	A	A	A	A	A	A	A	A	A	A	A	A	A	A	A	A	A	A	A	A	A	A	A
MT-738-T-C-no-rs	738	T	C	T	T	C	T	C	C	C	C	T	T	T	T	T	T	T	C	T	C	T	T	T	T	T	C	T	C	C	C	T	T	C	T	T	C	T	C	T	C	T	T	T	T	T	T	C	C
MT-777-G-A-no-rs	777	G	A	G	G	G	G	G	G	G	G	G	G	G	G	G	G	G	G	G	G	G	G	G	G	G	G	G	G	G	G	G	G	G	G	G	G	G	G	G	G	G	G	G	G	G	G	G	G
MT-807-C-T-no-rs	807	C	T	C	C	C	C	C	C	C	C	C	C	C	C	C	C	C	C	C	C	C	C	C	C	C	C	C	C	C	C	C	C	C	C	C	C	C	C	C	C	C	C	C	C	C	C	C	C
MT-824-T-C-no-rs	824	T	C	T	T	T	T	T	T	T	T	T	T	T	T	T	T	T	T	T	T	T	T	T	T	T	T	T	T	T	T	T	T	T	T	T	T	T	T	T	T	T	T	T	T	T	T	T	T
MT-850-C-T-no-rs	850	C	T	C	C	C	C	C	C	C	C	C	C	C	C	C	C	C	C	C	C	C	C	C	C	C	C	C	C	C	C	C	C	C	C	C	C	C	C	C	C	C	C	C	C	C	C	C	C
MT-852-G-A-no-rs	852	G	A	G	G	G	G	G	G	G	G	G	G	G	G	G	G	G	G	G	G	G	G	G	G	G	G	G	G	G	G	G	G	G	G	G	G	G	G	G	G	G	G	G	G	G	G	G	G
MT-856-A-G-no-rs	856	A	G	A	A	A	A	A	A	A	A	A	A	A	A	A	A	A	A	A	A	A	A	A	A	A	A	A	A	A	A	A	A	A	A	A	A	A	A	A	A	A	A	A	A	A	A	A	A
MT-873-C-T-no-rs	873	C	T	C	C	C	C	C	C	C	C	C	C	C	C	C	C	C	C	C	C	C	C	C	C	C	C	C	C	C	C	C	C	C	C	C	C	C	C	C	C	C	C	C	C	C	C	C	C
MT-951-C-T-no-rs	951	C	T	C	C	C	C	C	C	C	C	C	C	C	C	C	C	C	C	C	C	C	C	C	C	C	C	C	C	C	C	C	C	C	C	C	C	C	C	C	C	C	C	C	C	C	C	C	C
MT-956-A-G-no-rs	956	A	G	A	A	A	A	A	A	A	A	A	A	A	A	A	A	A	A	A	A	A	A	A	A	A	A	A	A	A	A	A	A	A	A	A	A	A	A	A	A	A	A	A	A	A	A	A	A
MT-960-T-C-rs395432572	960	T	C	T	T	C	T	C	C	C	C	T	T	T	T	T	T	T	C	T	C	T	T	T	T	T	C	T	C	C	C	T	T	C	T	T	C	T	C	T	C	T	T	T	T	T	T	C	C
MT-970-T-C-no-rs	970	T	C	T	T	T	T	T	T	T	T	T	T	T	T	T	T	T	T	T	T	T	T	T	T	T	T	T	T	T	T	T	T	T	T	T	T	T	T	T	T	T	T	T	T	T	T	T	T
MT-977-G-A-no-rs	977	G	A	G	G	G	G	G	G	G	G	G	G	G	G	G	G	G	G	G	G	G	G	G	G	G	G	G	G	G	G	G	G	G	G	G	G	G	G	G	G	G	G	G	G	G	G	G	G
MT-981-C-T-no-rs	981	C	T	C	C	C	C	C	C	C	C	C	C	C	C	C	C	C	C	C	C	C	C	C	C	C	C	C	C	C	C	C	C	C	C	C	C	C	C	C	C	C	C	C	C	C	C	C	C
MT-1098-A-G-no-rs	1098	A	G	A	A	A	A	A	A	A	A	A	A	A	A	A	A	A	A	A	A	A	A	A	A	A	A	A	A	A	A	A	A	A	A	A	A	A	A	A	A	A	A	A	A	A	A	A	A
MT-1099-A-G-no-rs	1099	A	G	A	A	A	A	A	A	A	A	A	A	A	A	A	A	A	A	A	A	A	A	A	A	A	A	A	A	A	A	A	A	A	A	A	A	A	A	A	A	A	A	A	A	A	A	A	A
MT-1100-A-G-no-rs	1100	A	G	A	A	A	A	A	A	A	A	A	A	A	A	A	A	A	A	A	A	A	A	A	A	A	A	A	A	A	A	A	A	A	A	A	A	A	A	A	A	A	A	A	A	A	A	A	A
MT-1133-T-C-no-rs	1133	T	C	T	T	T	T	T	T	T	T	T	T	T	T	T	T	T	T	T	T	T	T	T	T	T	T	T	T	T	T	T	T	T	T	T	T	T	T	T	T	T	T	T	T	T	T	T	T
MT-1137-T-C-no-rs	1137	T	C	T	T	T	T	T	T	T	T	T	T	T	T	T	T	T	T	T	T	T	T	T	T	T	T	T	T	T	T	T	T	T	T	T	T	T	T	T	T	T	T	T	T	T	T	T	T
MT-1140-T-C-no-rs	1140	T	C	T	T	T	T	T	T	T	T	T	T	T	T	T	T	T	T	T	T	T	T	T	T	T	T	T	T	T	T	T	T	T	T	T	T	T	T	T	T	T	T	T	T	T	T	T	T
MT-1145-T-C-no-rs	1145	T	C	T	T	T	T	T	T	T	T	T	T	T	T	T	T	T	T	T	T	T	T	T	T	T	T	T	T	T	T	T	T	T	T	T	T	T	T	T	T	T	T	T	T	T	T	T	T
MT-1154-G-A-no-rs	1154	G	A	G	G	G	G	G	G	G	G	G	G	G	G	G	G	G	G	G	G	G	G	G	G	G	G	G	G	G	G	G	G	G	G	G	G	G	G	G	G	G	G	G	G	G	G	G	G
MT-1254-C-T-no-rs	1254	C	T	C	C	C	C	C	C	C	C	C	C	C	C	C	C	C	C	C	C	C	C	C	C	C	C	C	C	C	C	C	C	C	C	C	C	C	C	C	C	C	C	C	C	C	C	C	C
MT-1325-G-A-no-rs	1325	G	A	G	G	G	G	G	G	G	G	G	G	G	G	G	G	G	G	G	G	G	G	G	G	G	G	G	G	G	G	G	G	G	G	G	G	G	G	G	G	G	G	G	G	G	G	G	G
MT-1374-A-G-rs396876798	1374	A	G	A	A	A	A	A	A	A	A	A	A	A	A	A	A	A	A	A	A	A	A	A	A	A	A	A	A	A	A	A	A	A	A	A	A	A	A	A	A	A	A	A	A	A	A	A	A
MT-1382-C-T-no-rs	1382	C	T	C	C	T	C	T	T	T	T	C	C	C	C	C	C	C	T	C	T	C	C	C	C	C	T	C	T	T	T	C	C	T	C	C	T	C	T	C	T	C	C	C	C	C	C	T	T
MT-1426-G-A-no-rs	1426	G	A	G	G	G	G	G	G	G	G	G	G	G	G	G	G	G	G	G	G	G	G	G	G	G	G	G	G	G	G	G	G	G	G	G	G	G	G	G	G	G	G	G	G	G	G	G	G
MT-1485-T-C-no-rs	1485	T	C	T	T	T	T	T	T	T	T	T	T	T	T	T	T	T	T	T	T	T	T	T	T	T	T	T	T	T	T	T	T	T	T	T	T	T	T	T	T	T	T	T	T	T	T	T	T
MT-1486-T-C-no-rs	1486	T	C	T	T	T	T	T	T	T	T	T	T	T	T	T	T	T	T	T	T	T	T	T	T	T	T	T	T	T	T	T	T	T	T	T	T	T	T	T	T	T	T	T	T	T	T	T	T
MT-1515-T-C-no-rs	1515	T	C	T	T	T	T	T	T	T	T	T	T	T	T	T	T	T	T	T	T	T	T	T	T	T	T	T	T	T	T	T	T	T	T	T	T	T	T	T	T	T	T	T	T	T	T	T	T
MT-1519-C-T-no-rs	1519	C	T	C	C	C	C	C	C	C	C	C	C	C	C	C	C	C	C	C	C	C	C	C	C	C	C	C	C	C	C	C	C	C	C	C	C	C	C	C	C	C	C	C	C	C	C	C	C
MT-1524-C-T-no-rs	1524	C	T	C	C	C	C	C	C	C	C	C	C	C	C	C	C	C	C	C	C	C	C	C	C	C	C	C	C	C	C	C	C	C	C	C	C	C	C	C	C	C	C	C	C	C	C	C	C
MT-1534-T-C-no-rs	1534	T	C	T	T	T	T	T	T	T	T	T	T	T	T	T	T	T	T	T	T	T	T	T	T	T	T	T	T	T	T	T	T	T	T	T	T	T	T	T	T	T	T	T	T	T	T	T	T
MT-1545-G-A-no-rs	1545	G	A	G	G	G	G	G	G	G	G	G	G	G	G	G	G	G	G	G	G	G	G	G	G	G	G	G	G	G	G	G	G	G	G	G	G	G	G	G	G	G	G	G	G	G	G	G	G
MT-1586-C-T-rs869311928	1586	C	T	C	C	C	C	C	C	C	C	C	C	C	C	C	C	C	C	C	C	C	C	C	C	C	C	C	C	C	C	C	C	C	C	C	C	C	C	C	C	C	C	C	C	C	C	C	C
MT-1608-A-T-no-rs	1608	A	T	A	A	A	A	A	A	A	A	A	A	A	A	A	A	A	A	A	A	A	A	A	A	A	A	A	A	A	A	A	A	A	A	A	A	A	A	A	A	A	A	A	A	A	A	A	A
MT-1667-C-T-no-rs	1667	C	T	C	C	C	C	C	C	C	C	C	C	C	C	C	C	C	C	C	C	C	C	C	C	C	C	C	C	C	C	C	C	C	C	C	C	C	C	C	C	C	C	C	C	C	C	C	C
MT-1683-A-C-no-rs	1683	A	C	A	A	C	A	C	C	C	C	A	A	A	A	A	A	A	C	A	C	A	A	A	A	A	C	A	C	C	C	A	A	C	A	A	C	A	C	A	C	A	A	A	A	A	A	C	C
MT-1688-T-C-no-rs	1688	T	C	T	T	T	T	T	T	T	T	T	T	T	T	T	T	T	T	T	T	T	T	T	T	T	T	T	T	T	T	T	T	T	T	T	T	T	T	T	T	T	T	T	T	T	T	T	T
MT-1689-C-A-no-rs	1689	C	A	C	C	C	C	C	C	C	C	C	C	C	C	C	C	C	C	C	C	C	C	C	C	C	C	C	C	C	C	C	C	C	C	C	C	C	C	C	C	C	C	C	C	C	C	C	C
MT-1690-A-G-no-rs	1690	A	G	A	A	A	A	A	A	A	A	A	A	A	A	A	A	A	A	A	A	A	A	A	A	A	A	A	A	A	A	A	A	A	A	A	A	A	A	A	A	A	A	A	A	A	A	A	A
MT-1693-C-T-no-rs	1693	C	T	C	C	C	C	C	C	C	C	C	C	C	C	C	C	C	C	C	C	C	C	C	C	C	C	C	C	C	C	C	C	C	C	C	C	C	C	C	C	C	C	C	C	C	C	C	C
MT-1696-A-G-no-rs	1696	A	G	A	A	A	A	A	A	A	A	A	A	A	A	A	A	A	A	A	A	A	A	A	A	A	A	A	A	A	A	A	A	A	A	A	A	A	A	A	A	A	A	A	A	A	A	A	A
MT-1712-C-T-no-rs	1712	C	T	C	C	C	C	C	C	C	C	C	C	C	C	C	C	C	C	C	C	C	C	C	C	C	C	C	C	C	C	C	C	C	C	C	C	C	C	C	C	C	C	C	C	C	C	C	C
MT-1731-A-G-no-rs	1731	A	G	A	A	A	A	A	A	A	A	A	A	A	A	A	A	A	A	A	A	A	A	A	A	A	A	A	A	A	A	A	A	A	A	A	A	A	A	A	A	A	A	A	A	A	A	A	A
MT-1735-C-T-no-rs	1735	C	T	C	C	C	C	C	C	C	C	C	C	C	C	C	C	C	C	C	C	C	C	C	C	C	C	C	C	C	C	C	C	C	C	C	C	C	C	C	C	C	C	C	C	C	C	C	C
MT-1780-T-C-no-rs	1780	T	C	T	T	T	T	T	T	T	T	T	T	T	T	T	T	T	T	T	T	T	T	T	T	T	T	T	T	T	T	T	T	T	T	T	T	T	T	T	T	T	T	T	T	T	T	T	T
MT-1790-T-C-rs869311929	1790	T	C	T	T	T	T	T	T	T	T	T	T	T	T	T	T	T	T	T	T	T	T	T	T	T	T	T	T	T	T	T	T	T	T	T	T	T	T	T	T	T	T	T	T	T	T	T	T
MT-1827-A-G-no-rs	1827	A	G	A	A	A	A	A	A	A	A	A	A	A	A	A	A	A	A	A	A	A	A	A	A	A	A	A	A	A	A	A	A	A	A	A	A	A	A	A	A	A	A	A	A	A	A	A	A
MT-1828-G-A-no-rs	1828	G	A	G	G	G	G	G	G	G	G	G	G	G	G	G	G	G	G	G	G	G	G	G	G	G	G	G	G	G	G	G	G	G	G	G	G	G	G	G	G	G	G	G	G	G	G	G	G
MT-1834-G-C-no-rs	1834	G	C	G	G	G	G	G	G	G	G	G	G	G	G	G	G	G	G	G	G	G	G	G	G	G	G	G	G	G	G	G	G	G	G	G	G	G	G	G	G	G	G	G	G	G	G	G	G
MT-1851-T-C-no-rs	1851	T	C	T	T	T	T	T	T	T	T	T	T	T	T	T	T	T	T	T	T	T	T	T	T	T	T	T	T	T	T	T	T	T	T	T	T	T	T	T	T	T	T	T	T	T	T	T	T
MT-1854-T-C-no-rs	1854	T	C	T	T	T	T	T	T	T	T	T	T	T	T	T	T	T	T	T	T	T	T	T	T	T	T	T	T	T	T	T	T	T	T	T	T	T	T	T	T	T	T	T	T	T	T	T	T
MT-1862-A-G-no-rs	1862	A	G	A	A	A	A	A	A	A	A	A	A	A	A	A	A	A	A	A	A	A	A	A	A	A	A	A	A	A	A	A	A	A	A	A	A	A	A	A	A	A	A	A	A	A	A	A	A
MT-1865-C-T-no-rs	1865	C	T	C	C	C	C	C	C	C	C	C	C	C	C	C	C	C	C	C	C	C	C	C	C	C	C	C	C	C	C	C	C	C	C	C	C	C	C	C	C	C	C	C	C	C	C	C	C
MT-1885-C-T-no-rs	1885	C	T	C	C	C	C	C	C	C	C	C	C	C	C	C	C	C	C	C	C	C	C	C	C	C	C	C	C	C	C	C	C	C	C	C	C	C	C	C	C	C	C	C	C	C	C	C	C
MT-1886-A-G-no-rs	1886	A	G	A	A	A	A	A	A	A	A	A	A	A	A	A	A	A	A	A	A	A	A	A	A	A	A	A	A	A	A	A	A	A	A	A	A	A	A	A	A	A	A	A	A	A	A	A	A
MT-1893-T-C-no-rs	1893	T	C	T	T	T	T	T	T	T	T	T	T	T	T	T	T	T	T	T	T	T	T	T	T	T	T	T	T	T	T	T	T	T	T	T	T	T	T	T	T	T	T	T	T	T	T	T	T
MT-1974-T-C-no-rs	1974	T	C	T	T	T	T	T	T	T	T	T	T	T	T	T	T	T	T	T	T	T	T	T	T	T	T	T	T	T	T	T	T	T	T	T	T	T	T	T	T	T	T	T	T	T	T	T	T
MT-2001-A-G-no-rs	2001	A	G	A	A	A	A	A	A	A	A	A	A	A	A	A	A	A	A	A	A	A	A	A	A	A	A	A	A	A	A	A	A	A	A	A	A	A	A	A	A	A	A	A	A	A	A	A	A
MT-2031-C-T-no-rs	2031	C	T	C	C	C	C	C	C	C	C	C	C	C	C	C	C	C	C	C	C	C	C	C	C	C	C	C	C	C	C	C	C	C	C	C	C	C	C	C	C	C	C	C	C	C	C	C	C
MT-2033-A-G-no-rs	2033	A	G	A	A	A	A	A	A	A	A	A	A	A	A	A	A	A	A	A	A	A	A	A	A	A	A	A	A	A	A	A	A	A	A	A	A	A	A	A	A	A	A	A	A	A	A	A	A
MT-2041-A-G-no-rs	2041	A	G	A	A	A	A	A	A	A	A	A	A	A	A	A	A	A	A	A	A	A	A	A	A	A	A	A	A	A	A	A	A	A	A	A	A	A	A	A	A	A	A	A	A	A	A	A	A
MT-2062-T-C-no-rs	2062	T	C	T	T	T	T	T	T	T	T	T	T	T	T	T	T	T	T	T	T	T	T	T	T	T	T	T	T	T	T	T	T	T	T	T	T	T	T	T	T	T	T	T	T	T	T	T	T
MT-2063-C-T-no-rs	2063	C	T	C	C	C	C	C	C	C	C	C	C	C	C	C	C	C	C	C	C	C	C	C	C	C	C	C	C	C	C	C	C	C	C	C	C	C	C	C	C	C	C	C	C	C	C	C	C
MT-2064-C-T-no-rs	2064	C	T	C	C	C	C	C	C	C	C	C	C	C	C	C	C	C	C	C	C	C	C	C	C	C	C	C	C	C	C	C	C	C	C	C	C	C	C	C	C	C	C	C	C	C	C	C	C
MT-2073-G-A-no-rs	2073	G	A	G	G	G	G	G	G	G	G	G	G	G	G	G	G	G	G	G	G	G	G	G	G	G	G	G	G	G	G	G	G	G	G	G	G	G	G	G	G	G	G	G	G	G	G	G	G
MT-2078-T-A-no-rs	2078	T	A	T	T	T	T	T	T	T	T	T	T	T	T	T	T	T	T	T	T	T	T	T	T	T	T	T	T	T	T	T	T	T	T	T	T	T	T	T	T	T	T	T	T	T	T	T	T
MT-2098-G-A-no-rs	2098	G	A	G	G	G	G	G	G	G	G	G	G	G	G	G	G	G	G	G	G	G	G	G	G	G	G	G	G	G	G	G	G	G	G	G	G	G	G	G	G	G	G	G	G	G	G	G	G
MT-2100-T-C-no-rs	2100	T	C	T	T	T	T	T	T	T	T	T	T	T	T	T	T	T	T	T	T	T	T	T	T	T	T	T	T	T	T	T	T	T	T	T	T	T	T	T	T	T	T	T	T	T	T	T	T
MT-2101-T-C-no-rs	2101	T	C	T	T	T	T	T	T	T	T	T	T	T	T	T	T	T	T	T	T	T	T	T	T	T	T	T	T	T	T	T	T	T	T	T	T	T	T	T	T	T	T	T	T	T	T	T	T
MT-2102-T-C-no-rs	2102	T	C	T	T	T	T	T	T	T	T	T	T	T	T	T	T	T	T	T	T	T	T	T	T	T	T	T	T	T	T	T	T	T	T	T	T	T	T	T	T	T	T	T	T	T	T	T	T
MT-2103-T-A-no-rs	2103	T	A	T	T	T	T	T	T	T	T	T	T	T	T	T	T	T	T	T	T	T	T	T	T	T	T	T	T	T	T	T	T	T	T	T	T	T	T	T	T	T	T	T	T	T	T	T	T
MT-2119-C-T-no-rs	2119	C	T	C	C	C	C	C	C	C	C	C	C	C	C	C	C	C	C	C	C	C	C	C	C	C	C	C	C	C	C	C	C	C	C	C	C	C	C	C	C	C	C	C	C	C	C	C	C
MT-2139-C-T-no-rs	2139	C	T	C	C	C	C	C	C	C	C	C	C	C	C	C	C	C	C	C	C	C	C	C	C	C	C	C	C	C	C	C	C	C	C	C	C	C	C	C	C	C	C	C	C	C	C	C	C
MT-2141-C-A-no-rs	2141	C	A	C	C	C	C	C	C	C	C	C	C	C	C	C	C	C	C	C	C	C	C	C	C	C	C	C	C	C	C	C	C	C	C	C	C	C	C	C	C	C	C	C	C	C	C	C	C
MT-2152-G-T-no-rs	2152	G	T	G	G	G	G	G	G	G	G	G	G	G	G	G	G	G	G	G	G	G	G	G	G	G	G	G	G	G	G	G	G	G	G	G	G	G	G	G	G	G	G	G	G	G	G	G	G
MT-2154-G-A-no-rs	2154	G	A	G	G	G	G	G	G	G	G	G	G	G	G	G	G	G	G	G	G	G	G	G	G	G	G	G	G	G	G	G	G	G	G	G	G	G	G	G	G	G	G	G	G	G	G	G	G
MT-2216-C-T-no-rs	2216	C	T	C	C	C	C	C	C	C	C	C	C	C	C	C	C	C	C	C	C	C	C	C	C	C	C	C	C	C	C	C	C	C	C	C	C	C	C	C	C	C	C	C	C	C	C	C	C
MT-2218-C-T-no-rs	2218	C	T	C	C	C	C	C	C	C	C	C	C	C	C	C	C	C	C	C	C	C	C	C	C	C	C	C	C	C	C	C	C	C	C	C	C	C	C	C	C	C	C	C	C	C	C	C	C
MT-2232-T-C-no-rs	2232	T	C	T	T	T	T	T	T	T	T	T	T	T	T	T	T	T	T	T	T	T	T	T	T	T	T	T	T	T	T	T	T	T	T	T	T	T	T	T	T	T	T	T	T	T	T	T	T
MT-2249-T-C-no-rs	2249	T	C	T	T	T	T	T	T	T	T	T	T	T	T	T	T	T	T	T	T	T	T	T	T	T	T	T	T	T	T	T	T	T	T	T	T	T	T	T	T	T	T	T	T	T	T	T	T
MT-2261-C-T-no-rs	2261	C	T	C	C	C	C	C	C	C	C	C	C	C	C	C	C	C	C	C	C	C	C	C	C	C	C	C	C	C	C	C	C	C	C	C	C	C	C	C	C	C	C	C	C	C	C	C	C
MT-2263-G-A-no-rs	2263	G	A	G	G	G	G	G	G	G	G	G	G	G	G	G	G	G	G	G	G	G	G	G	G	G	G	G	G	G	G	G	G	G	G	G	G	G	G	G	G	G	G	G	G	G	G	G	G
MT-2319-C-T-no-rs	2319	C	T	C	C	C	C	C	C	C	C	C	C	C	C	C	C	C	C	C	C	C	C	C	C	C	C	C	C	C	C	C	C	C	C	C	C	C	C	C	C	C	C	C	C	C	C	C	C
MT-2338-A-G-no-rs	2338	A	G	A	A	A	A	A	A	A	A	A	A	A	A	A	A	A	A	A	A	A	A	A	A	A	A	A	A	A	A	A	A	A	A	A	A	A	A	A	A	A	A	A	A	A	A	A	A
MT-2363-A-T-no-rs	2363	A	T	A	A	A	A	A	A	A	A	A	A	A	A	A	A	A	A	A	A	A	A	A	A	A	A	A	A	A	A	A	A	A	A	A	A	A	A	A	A	A	A	A	A	A	A	A	A
MT-2411-C-T-no-rs	2411	C	T	C	C	C	C	C	C	C	C	C	C	C	C	C	C	C	C	C	C	C	C	C	C	C	C	C	C	C	C	C	C	C	C	C	C	C	C	C	C	C	C	C	C	C	C	C	C
MT-2412-C-A-no-rs	2412	C	A	C	C	C	C	C	C	C	C	C	C	C	C	C	C	C	C	C	C	C	C	C	C	C	C	C	C	C	C	C	C	C	C	C	C	C	C	C	C	C	C	C	C	C	C	C	C
MT-2418-C-T-no-rs	2418	C	T	C	C	C	C	C	C	C	C	C	C	C	C	C	C	C	C	C	C	C	C	C	C	C	C	C	C	C	C	C	C	C	C	C	C	C	C	C	C	C	C	C	C	C	C	C	C
MT-2459-A-G-no-rs	2459	A	G	A	A	A	A	A	A	A	A	A	A	A	A	A	A	A	A	A	A	A	A	A	A	A	A	A	A	A	A	A	A	A	A	A	A	A	A	A	A	A	A	A	A	A	A	A	A
MT-2467-T-C-no-rs	2467	T	C	T	T	T	T	T	T	T	T	T	T	T	T	T	T	T	T	T	T	T	T	T	T	T	T	T	T	T	T	T	T	T	T	T	T	T	T	T	T	T	T	T	T	T	T	T	T
MT-2475-C-G-no-rs	2475	C	G	C	C	C	C	C	C	C	C	C	C	C	C	C	C	C	C	C	C	C	C	C	C	C	C	C	C	C	C	C	C	C	C	C	C	C	C	C	C	C	C	C	C	C	C	C	C
MT-2488-G-T-no-rs	2488	G	T	G	G	G	G	G	G	G	G	G	G	G	G	G	G	G	G	G	G	G	G	G	G	G	G	G	G	G	G	G	G	G	G	G	G	G	G	G	G	G	G	G	G	G	G	G	G
MT-2515-T-C-no-rs	2515	T	C	T	T	T	T	T	T	T	T	T	T	T	T	T	T	T	T	T	T	T	T	T	T	T	T	T	T	T	T	T	T	T	T	T	T	T	T	T	T	T	T	T	T	T	T	T	T
MT-2569-T-C-no-rs	2569	T	C	T	T	T	T	T	T	T	T	T	T	T	T	T	T	T	T	T	T	T	T	T	T	T	T	T	T	T	T	T	T	T	T	T	T	T	T	T	T	T	T	T	T	T	T	T	T
MT-2607-C-T-no-rs	2607	C	T	C	C	C	C	C	C	C	C	C	C	C	C	C	C	C	C	C	C	C	C	C	C	C	C	C	C	C	C	C	C	C	C	C	C	C	C	C	C	C	C	C	C	C	C	C	C
MT-2614-C-T-rs869311932	2614	C	T	C	C	C	C	C	C	C	C	C	C	C	C	C	C	C	C	C	C	C	C	C	C	C	C	C	C	C	C	C	C	C	C	C	C	C	C	C	C	C	C	C	C	C	C	C	C
MT-2671-T-C-no-rs	2671	T	C	T	T	T	T	T	T	T	T	T	T	T	T	T	T	T	T	T	T	T	T	T	T	T	T	T	T	T	T	T	T	T	T	T	T	T	T	T	T	T	T	T	T	T	T	T	T
MT-2721-A-G-no-rs	2721	A	G	A	A	A	A	A	A	A	A	A	A	A	A	A	A	A	A	A	A	A	A	A	A	A	A	A	A	A	A	A	A	A	A	A	A	A	A	A	A	A	A	A	A	A	A	A	A
MT-2742-T-C-no-rs	2742	T	C	T	T	T	T	T	T	T	T	T	T	T	T	T	T	T	T	T	T	T	T	T	T	T	T	T	T	T	T	T	T	T	T	T	T	T	T	T	T	T	T	T	T	T	T	T	T
MT-2770-C-T-no-rs	2770	C	T	C	C	C	C	C	C	C	C	C	C	C	C	C	C	C	C	C	C	C	C	C	C	C	C	C	C	C	C	C	C	C	C	C	C	C	C	C	C	C	C	C	C	C	C	C	C
MT-2788-C-T-rs394749076	2788	C	T	N	T	T	T	T	T	T	T	T	T	T	T	T	T	T	T	T	T	T	T	T	C	T	T	T	T	T	T	T	T	T	T	T	T	T	T	T	T	T	T	T	T	T	T	T	T
MT-2795-C-T-no-rs	2795	C	T	C	C	C	C	C	C	C	C	C	C	C	C	C	C	C	C	C	C	C	C	C	C	C	C	C	C	C	C	C	C	C	C	C	C	C	C	C	C	C	C	C	C	C	C	C	C
MT-2801-G-A-no-rs	2801	G	A	G	G	G	G	G	G	G	G	G	G	G	G	G	G	G	G	G	G	G	G	G	G	G	G	G	G	G	G	G	G	G	G	G	G	G	G	G	G	G	G	G	G	G	G	G	G
MT-2802-T-C-no-rs	2802	T	C	T	T	T	T	T	T	T	T	T	T	T	T	T	T	T	T	T	T	T	T	T	T	T	T	T	T	T	T	T	T	T	T	T	T	T	T	T	T	T	T	T	T	T	T	T	T
MT-2803-C-T-no-rs	2803	C	T	C	C	C	C	C	C	C	C	C	C	C	C	C	C	C	C	C	C	C	C	C	C	C	C	C	C	C	C	C	C	C	C	C	C	C	C	C	C	C	C	C	C	C	C	C	C
MT-2810-T-C-no-rs	2810	T	C	T	T	T	T	T	T	T	T	T	T	T	T	T	T	T	T	T	T	T	T	T	T	T	T	T	T	T	T	T	T	T	T	T	T	T	T	T	T	T	T	T	T	T	T	T	T
MT-2827-C-T-no-rs	2827	C	T	C	C	C	C	C	C	C	C	C	C	C	C	C	C	C	C	C	C	C	C	C	C	C	C	C	C	C	C	C	C	C	C	C	C	C	C	C	C	C	C	C	C	C	C	C	C
MT-2849-G-A-no-rs	2849	G	A	G	G	G	G	G	G	G	G	G	G	G	G	G	G	G	G	G	G	G	G	G	G	G	G	G	G	G	G	G	G	G	G	G	G	G	G	G	G	G	G	G	G	G	G	G	G
MT-2855-G-A-no-rs	2855	G	A	G	G	G	G	G	G	G	G	G	G	G	G	G	G	G	G	G	G	G	G	G	G	G	G	G	G	G	G	G	G	G	G	G	G	G	G	G	G	G	G	G	G	G	G	G	G
MT-2860-T-C-no-rs	2860	T	C	T	T	T	T	T	T	T	T	T	T	T	T	T	T	T	T	T	T	T	T	T	T	T	T	T	T	T	T	T	T	T	T	T	T	T	T	T	T	T	T	T	T	T	T	T	T
MT-2885-A-G-no-rs	2885	A	G	A	A	A	A	A	A	A	A	A	A	A	A	A	A	A	A	A	A	A	A	A	A	A	A	A	A	A	A	A	A	A	A	A	A	A	A	A	A	A	A	A	A	A	A	A	A
MT-2899-T-C-rs396361796	2899	T	C	T	T	T	T	T	T	T	T	T	T	T	T	T	T	T	T	T	T	T	T	T	T	T	T	T	T	T	T	T	T	T	T	T	T	T	T	T	T	T	T	T	T	T	T	T	T
MT-2911-A-G-no-rs	2911	A	G	A	A	A	A	A	A	A	A	A	A	A	A	A	A	A	A	A	A	A	A	A	A	A	A	A	A	A	A	A	A	A	A	A	A	A	A	A	A	A	A	A	A	A	A	A	A
MT-2914-T-C-no-rs	2914	T	C	T	T	T	T	T	T	T	T	T	T	T	T	T	T	T	T	T	T	T	T	T	T	T	T	T	T	T	T	T	T	T	T	T	T	T	T	T	T	T	T	T	T	T	T	T	T
MT-2915-A-G-no-rs	2915	A	G	A	A	A	A	A	A	A	A	A	A	A	A	A	A	A	A	A	A	A	A	A	A	A	A	A	A	A	A	A	A	A	A	A	A	A	A	A	A	A	A	A	A	A	A	A	A
MT-2917-T-C-no-rs	2917	T	C	T	T	T	T	T	T	T	T	T	T	T	T	T	T	T	T	T	T	T	T	T	T	T	T	T	T	T	T	T	T	T	T	T	T	T	T	T	T	T	T	T	T	T	T	T	T
MT-2920-C-T-no-rs	2920	C	T	C	C	C	C	C	C	C	C	C	C	C	C	C	C	C	C	C	C	C	C	C	C	C	C	C	C	C	C	C	C	C	C	C	C	C	C	C	C	C	C	C	C	C	C	C	C
MT-2929-C-T-no-rs	2929	C	T	C	C	C	C	C	C	C	C	C	C	C	C	C	C	C	C	C	C	C	C	C	C	C	C	C	C	C	C	C	C	C	C	C	C	C	C	C	C	C	C	C	C	C	C	C	C
MT-2938-T-C-no-rs	2938	T	C	T	T	T	T	T	T	T	T	T	T	T	T	T	T	T	T	T	T	T	T	T	T	T	T	T	T	T	T	T	T	T	T	T	T	T	T	T	T	T	T	T	T	T	T	T	T
MT-2940-T-C-no-rs	2940	T	C	T	C	T	C	T	T	T	T	C	C	C	C	C	C	C	T	C	T	C	C	C	T	C	T	C	T	T	T	C	C	T	C	C	T	C	T	C	T	C	C	C	C	C	C	T	T
MT-2947-G-A-no-rs	2947	G	A	G	G	G	G	G	G	G	G	G	G	G	G	G	G	G	G	G	G	G	G	G	G	G	G	G	G	G	G	G	G	G	G	G	G	G	G	G	G	G	G	G	G	G	G	G	G
MT-2971-G-A-no-rs	2971	G	A	G	G	G	G	G	G	G	G	G	G	G	G	G	G	G	G	G	G	G	G	G	G	G	G	G	G	G	G	G	G	G	G	G	G	G	G	G	G	G	G	G	G	G	G	G	G
MT-2983-C-T-no-rs	2983	C	T	C	C	C	C	C	C	C	C	C	C	C	C	C	C	C	C	C	C	C	C	C	C	C	C	C	C	C	C	C	C	C	C	C	C	C	C	C	C	C	C	C	C	C	C	C	C
MT-2986-C-T-no-rs	2986	C	T	C	C	C	C	C	C	C	C	C	C	C	C	C	C	C	C	C	C	C	C	C	C	C	C	C	C	C	C	C	C	C	C	C	C	C	C	C	C	C	C	C	C	C	C	C	C
MT-3007-A-C-no-rs	3007	A	C	A	A	A	A	A	A	A	A	A	A	A	A	A	A	A	A	A	A	A	A	A	A	A	A	A	A	A	A	A	A	A	A	A	A	A	A	A	A	A	A	A	A	A	A	A	A
MT-3013-G-A-no-rs	3013	G	A	G	G	G	G	G	G	G	G	G	G	G	G	G	G	G	G	G	G	G	G	G	G	G	G	G	G	G	G	G	G	G	G	G	G	G	G	G	G	G	G	G	G	G	G	G	G
MT-3034-T-C-no-rs	3034	T	C	T	T	T	T	T	T	T	T	T	T	T	T	T	T	T	T	T	T	T	T	T	T	T	T	T	T	T	T	T	T	T	T	T	T	T	T	T	T	T	T	T	T	T	T	T	T
MT-3037-G-A-no-rs	3037	G	A	G	G	G	G	G	G	G	G	G	G	G	G	G	G	G	G	G	G	G	G	G	G	G	G	G	G	G	G	G	G	G	G	G	G	G	G	G	G	G	G	G	G	G	G	G	G
MT-3043-A-G-no-rs	3043	A	G	A	A	A	A	A	A	A	A	A	A	A	A	A	A	A	A	A	A	A	A	A	A	A	A	A	A	A	A	A	A	A	A	A	A	A	A	A	A	A	A	A	A	A	A	A	A
MT-3058-C-T-no-rs	3058	C	T	C	C	C	C	C	C	C	C	C	C	C	C	C	C	C	C	C	C	C	C	C	C	C	C	C	C	C	C	C	C	C	C	C	C	C	C	C	C	C	C	C	C	C	C	C	C
MT-3064-A-G-no-rs	3064	A	G	A	A	A	A	A	A	A	A	A	A	A	A	A	A	A	A	A	A	A	A	A	A	A	A	A	A	A	A	A	A	A	A	A	A	A	A	A	A	A	A	A	A	A	A	A	A
MT-3100-C-T-no-rs	3100	C	T	C	C	C	C	C	C	C	C	C	C	C	C	C	C	C	C	C	C	C	C	C	C	C	C	C	C	C	C	C	C	C	C	C	C	C	C	C	C	C	C	C	C	C	C	C	C
MT-3121-T-C-no-rs	3121	T	C	T	T	T	T	T	T	T	T	T	T	T	T	T	T	T	T	T	T	T	T	T	T	T	T	T	T	T	T	T	T	T	T	T	T	T	T	T	T	T	T	T	T	T	T	T	T
MT-3130-A-G-no-rs	3130	A	G	A	A	A	A	A	A	A	A	A	A	A	A	A	A	A	A	A	A	A	A	A	A	A	A	A	A	A	A	A	A	A	A	A	A	A	A	A	A	A	A	A	A	A	A	A	A
MT-3133-G-A-no-rs	3133	G	A	G	G	G	G	G	G	G	G	G	G	G	G	G	G	G	G	G	G	G	G	G	G	G	G	G	G	G	G	G	G	G	G	G	G	G	G	G	G	G	G	G	G	G	G	G	G
MT-3154-C-T-no-rs	3154	C	T	C	C	C	C	C	C	C	C	C	C	C	C	C	C	C	C	C	C	C	C	C	C	C	C	C	C	C	C	C	C	C	C	C	C	C	C	C	C	C	C	C	C	C	C	C	C
MT-3166-T-C-no-rs	3166	T	C	T	T	T	T	T	T	T	T	T	T	T	T	T	T	T	T	T	T	T	T	T	T	T	T	T	T	T	T	T	T	T	T	T	T	T	T	T	T	T	T	T	T	T	T	T	T
MT-3167-C-T-no-rs	3167	C	T	C	C	C	C	C	C	C	C	C	C	C	C	C	C	C	C	C	C	C	C	C	C	C	C	C	C	C	C	C	C	C	C	C	C	C	C	C	C	C	C	C	C	C	C	C	C
MT-3190-C-T-no-rs	3190	C	T	C	C	C	C	C	C	C	C	C	C	C	C	C	C	C	C	C	C	C	C	C	C	C	C	C	C	C	C	C	C	C	C	C	C	C	C	C	C	C	C	C	C	C	C	C	C
MT-3193-A-G-no-rs	3193	A	G	A	A	A	A	A	A	A	A	A	A	A	A	A	A	A	A	A	A	A	A	A	A	A	A	A	A	A	A	A	A	A	A	A	A	A	A	A	A	A	A	A	A	A	A	A	A
MT-3196-C-T-no-rs	3196	C	T	C	C	C	C	C	C	C	C	C	C	C	C	C	C	C	C	C	C	C	C	C	C	C	C	C	C	C	C	C	C	C	C	C	C	C	C	C	C	C	C	C	C	C	C	C	C
MT-3211-A-T-no-rs	3211	A	T	A	A	A	A	A	A	A	A	A	A	A	A	A	A	A	A	A	A	A	A	A	A	A	A	A	A	A	A	A	A	A	A	A	A	A	A	A	A	A	A	A	A	A	A	A	A
MT-3214-C-T-no-rs	3214	C	T	C	C	C	C	C	C	C	C	C	C	C	C	C	C	C	C	C	C	C	C	C	C	C	C	C	C	C	C	C	C	C	C	C	C	C	C	C	C	C	C	C	C	C	C	C	C
MT-3217-C-T-no-rs	3217	C	T	C	C	C	C	C	C	C	C	C	C	C	C	C	C	C	C	C	C	C	C	C	C	C	C	C	C	C	C	C	C	C	C	C	C	C	C	C	C	C	C	C	C	C	C	C	C
MT-3220-A-G-no-rs	3220	A	G	A	A	A	A	A	A	A	A	A	A	A	A	A	A	A	A	A	A	A	A	A	A	A	A	A	A	A	A	A	A	A	A	A	A	A	A	A	A	A	A	A	A	A	A	A	A
MT-3238-A-G-no-rs	3238	A	G	A	A	A	A	A	A	A	A	A	A	A	A	A	A	A	A	A	A	A	A	A	A	A	A	A	A	A	A	A	A	A	A	A	A	A	A	A	A	A	A	A	A	A	A	A	A
MT-3254-T-C-no-rs	3254	T	C	T	T	T	T	T	T	T	T	T	T	T	T	T	T	T	T	T	T	T	T	T	T	T	T	T	T	T	T	T	T	T	T	T	T	T	T	T	T	T	T	T	T	T	T	T	T
MT-3265-T-C-no-rs	3265	T	C	T	T	T	T	T	T	T	T	T	T	T	T	T	T	T	T	T	T	T	T	T	T	T	T	T	T	T	T	T	T	T	T	T	T	T	T	T	T	T	T	T	T	T	T	T	T
MT-3268-T-C-no-rs	3268	T	C	T	T	T	T	T	T	T	T	T	T	T	T	T	T	T	T	T	T	T	T	T	T	T	T	T	T	T	T	T	T	T	T	T	T	T	T	T	T	T	T	T	T	T	T	T	T
MT-3271-T-C-no-rs	3271	T	C	T	T	C	T	C	C	C	C	T	T	T	T	T	T	T	C	T	C	T	T	T	T	T	C	T	C	C	C	T	T	C	T	T	C	T	C	T	C	T	T	T	T	T	T	C	C
MT-3283-C-T-no-rs	3283	C	T	C	C	C	C	C	C	C	C	C	C	C	C	C	C	C	C	C	C	C	C	C	C	C	C	C	C	C	C	C	C	C	C	C	C	C	C	C	C	C	C	C	C	C	C	C	C
MT-3284-C-T-no-rs	3284	C	T	C	C	C	C	C	C	C	C	C	C	C	C	C	C	C	C	C	C	C	C	C	C	C	C	C	C	C	C	C	C	C	C	C	C	C	C	C	C	C	C	C	C	C	C	C	C
MT-3286-C-A-no-rs	3286	C	A	C	C	C	C	C	C	C	C	C	C	C	C	C	C	C	C	C	C	C	C	C	C	C	C	C	C	C	C	C	C	C	C	C	C	C	C	C	C	C	C	C	C	C	C	C	C
MT-3322-G-A-no-rs	3322	G	A	G	G	G	G	G	G	G	G	G	G	G	G	G	G	G	G	G	G	G	G	G	G	G	G	G	G	G	G	G	G	G	G	G	G	G	G	G	G	G	G	G	G	G	G	G	G
MT-3340-A-G-no-rs	3340	A	G	A	A	A	A	A	A	A	A	A	A	A	A	A	A	A	A	A	A	A	A	A	A	A	A	A	A	A	A	A	A	A	A	A	A	A	A	A	A	A	A	A	A	A	A	A	A
MT-3364-T-C-no-rs	3364	T	C	T	T	T	T	T	T	T	T	T	T	T	T	T	T	T	T	T	T	T	T	T	T	T	T	T	T	T	T	T	T	T	T	T	T	T	T	T	T	T	T	T	T	T	T	T	T
MT-3376-A-G-no-rs	3376	A	G	A	A	A	A	A	A	A	A	A	A	A	A	A	A	A	A	A	A	A	A	A	A	A	A	A	A	A	A	A	A	A	A	A	A	A	A	A	A	A	A	A	A	A	A	A	A
MT-3397-T-C-no-rs	3397	T	C	T	T	T	T	T	T	T	T	T	T	T	T	T	T	T	T	T	T	T	T	T	T	T	T	T	T	T	T	T	T	T	T	T	T	T	T	T	T	T	T	T	T	T	T	T	T
MT-3409-T-C-no-rs	3409	T	C	T	T	T	T	T	T	T	T	T	T	T	T	T	T	T	T	T	T	T	T	T	T	T	T	T	T	T	T	T	T	T	T	T	T	T	T	T	T	T	T	T	T	T	T	T	T
MT-3433-T-C-no-rs	3433	T	C	T	T	T	T	T	T	T	T	T	T	T	T	T	T	T	T	T	T	T	T	T	T	T	T	T	T	T	T	T	T	T	T	T	T	T	T	T	T	T	T	T	T	T	T	T	T
MT-3439-C-T-no-rs	3439	C	T	C	C	C	C	C	C	C	C	C	C	C	C	C	C	C	C	C	C	C	C	C	C	C	C	C	C	C	C	C	C	C	C	C	C	C	C	C	C	C	C	C	C	C	C	C	C
MT-3445-A-T-no-rs	3445	A	T	A	A	A	A	A	A	A	A	A	A	A	A	A	A	A	A	A	A	A	A	A	A	A	A	A	A	A	A	A	A	A	A	A	A	A	A	A	A	A	A	A	A	A	A	A	A
MT-3475-C-T-no-rs	3475	C	T	C	C	C	C	C	C	C	C	C	C	C	C	C	C	C	C	C	C	C	C	C	C	C	C	C	C	C	C	C	C	C	C	C	C	C	C	C	C	C	C	C	C	C	C	C	C
MT-3499-A-T-no-rs	3499	A	T	A	A	A	A	A	A	A	A	A	A	A	A	A	A	A	A	A	A	A	A	A	A	A	A	A	A	A	A	A	A	A	A	A	A	A	A	A	A	A	A	A	A	A	A	A	A
MT-3513-A-G-no-rs	3513	A	G	A	A	A	A	A	A	A	A	A	A	A	A	A	A	A	A	A	A	A	A	A	A	A	A	A	A	A	A	A	A	A	A	A	A	A	A	A	A	A	A	A	A	A	A	A	A
MT-3514-C-T-no-rs	3514	C	T	C	C	C	C	C	C	C	C	C	C	C	C	C	C	C	C	C	C	C	C	C	C	C	C	C	C	C	C	C	C	C	C	C	C	C	C	C	C	C	C	C	C	C	C	C	C
MT-3517-C-T-rs397498772	3517	C	T	C	C	C	C	C	C	C	C	C	C	C	C	C	C	C	C	C	C	C	C	C	C	C	C	C	C	C	C	C	C	C	C	C	C	C	C	C	C	C	C	C	C	C	C	C	C
MT-3520-C-T-no-rs	3520	C	T	C	C	C	C	C	C	C	C	C	C	C	C	C	C	C	C	C	C	C	C	C	C	C	C	C	C	C	C	C	C	C	C	C	C	C	C	C	C	C	C	C	C	C	C	C	C
MT-3523-G-A-no-rs	3523	G	A	G	G	G	G	G	G	G	G	G	G	G	G	G	G	G	G	G	G	G	G	G	G	G	G	G	G	G	G	G	G	G	G	G	G	G	G	G	G	G	G	G	G	G	G	G	G
MT-3550-C-T-no-rs	3550	C	T	C	C	C	C	C	C	C	C	C	C	C	C	C	C	C	C	C	C	C	C	C	C	C	C	C	C	C	C	C	C	C	C	C	C	C	C	C	C	C	C	C	C	C	C	C	C
MT-3553-T-A-no-rs	3553	T	A	T	T	T	T	T	T	T	T	T	T	T	T	T	T	T	T	T	T	T	T	T	T	T	T	T	T	T	T	T	T	T	T	T	T	T	T	T	T	T	T	T	T	T	T	T	T
MT-3557-G-A-no-rs	3557	G	A	G	G	A	G	A	A	A	A	G	G	G	G	G	G	G	A	G	A	G	G	G	G	G	A	G	A	A	A	G	G	A	G	G	A	G	A	G	A	G	G	G	G	G	G	A	A
MT-3562-C-T-no-rs	3562	C	T	C	C	C	C	C	C	C	C	C	C	C	C	C	C	C	C	C	C	C	C	C	C	C	C	C	C	C	C	C	C	C	C	C	C	C	C	C	C	C	C	C	C	C	C	C	C
MT-3576-C-T-no-rs	3576	C	T	N	T	C	T	C	C	C	C	T	T	T	T	T	T	T	C	T	C	T	T	T	C	T	C	T	C	C	C	T	T	C	T	T	N	T	C	T	C	T	T	T	T	T	T	C	C
MT-3616-T-C-no-rs	3616	T	C	T	T	C	T	C	C	C	C	T	T	T	T	T	T	T	C	T	C	T	T	T	T	T	C	T	C	C	C	T	T	C	T	T	C	T	C	T	C	T	T	T	T	T	T	C	C
MT-3635-C-T-no-rs	3635	C	T	C	C	C	C	C	C	C	C	C	C	C	C	C	C	C	C	C	C	C	C	C	C	C	C	C	C	C	C	C	C	C	C	C	C	C	C	C	C	C	C	C	C	C	C	C	C
MT-3643-G-A-no-rs	3643	G	A	G	G	G	G	G	G	G	G	G	G	G	G	G	G	G	G	G	G	G	G	G	G	G	G	G	G	G	G	G	G	G	G	G	G	G	G	G	G	G	G	G	G	G	G	G	G
MT-3652-A-G-no-rs	3652	A	G	A	A	A	A	A	A	A	A	A	A	A	A	A	A	A	A	A	A	A	A	A	A	A	A	A	A	A	A	A	A	A	A	A	A	A	A	A	A	A	A	A	A	A	A	A	A
MT-3658-C-T-no-rs	3658	C	T	C	C	C	C	C	C	C	C	C	C	C	C	C	C	C	C	C	C	C	C	C	C	C	C	C	C	C	C	C	C	C	C	C	C	C	C	C	C	C	C	C	C	C	C	C	C
MT-3697-C-T-no-rs	3697	C	T	C	C	C	C	C	C	C	C	C	C	C	C	C	C	C	C	C	C	C	C	C	C	C	C	C	C	C	C	C	C	C	C	C	C	C	C	C	C	C	C	C	C	C	C	C	C
MT-3701-C-T-no-rs	3701	C	T	C	C	C	C	C	C	C	C	C	C	C	C	C	C	C	C	C	C	C	C	C	C	C	C	C	C	C	C	C	C	C	C	C	C	C	C	C	C	C	C	C	C	C	C	C	C
MT-3727-G-A-rs869311934	3727	G	A	G	G	G	G	G	G	G	G	G	G	G	G	G	G	G	G	G	G	G	G	G	G	G	G	G	G	G	G	G	G	G	G	G	G	G	G	G	G	G	G	G	G	G	G	G	G
MT-3776-C-T-no-rs	3776	C	T	C	C	C	C	C	C	C	C	C	C	C	C	C	C	C	C	C	C	C	C	C	C	C	C	C	C	C	C	C	C	C	C	C	C	C	C	C	C	C	C	C	C	C	C	C	C
MT-3800-T-C-no-rs	3800	T	C	T	T	C	T	C	C	C	C	T	T	T	T	T	T	T	C	T	C	T	T	T	T	T	C	T	C	C	C	T	T	C	T	T	C	T	C	T	C	T	T	T	T	T	T	C	C
MT-3836-C-T-no-rs	3836	C	T	C	C	C	C	C	C	C	C	C	C	C	C	C	C	C	C	C	C	C	C	C	C	C	C	C	C	C	C	C	C	C	C	C	C	C	C	C	C	C	C	C	C	C	C	C	C
MT-3848-G-A-no-rs	3848	G	A	G	G	G	G	G	G	G	G	G	G	G	G	G	G	G	G	G	G	G	G	G	G	G	G	G	G	G	G	G	G	G	G	G	G	G	G	G	G	G	G	G	G	G	G	G	G
MT-3850-A-G-no-rs	3850	A	G	A	A	A	A	A	A	A	A	A	A	A	A	A	A	A	A	A	A	A	A	A	A	A	A	A	A	A	A	A	A	A	A	A	A	A	A	A	A	A	A	A	A	A	A	A	A
MT-3942-T-C-rs394585270	3942	T	C	T	T	C	T	C	C	C	C	T	T	T	T	T	T	T	C	T	C	T	T	T	T	T	C	T	C	C	C	T	T	C	T	T	C	T	C	T	C	T	T	T	T	T	T	C	C
MT-3952-T-C-no-rs	3952	T	C	T	T	T	T	T	T	T	T	T	T	T	T	T	T	T	T	T	T	T	T	T	T	T	T	T	T	T	T	T	T	T	T	T	T	T	T	T	T	T	T	T	T	T	T	T	T
MT-3959-C-T-no-rs	3959	C	T	C	C	C	C	C	C	C	C	C	C	C	C	C	C	C	C	C	C	C	C	C	C	C	C	C	C	C	C	C	C	C	C	C	C	C	C	C	C	C	C	C	C	C	C	C	C
MT-3960-T-C-no-rs	3960	T	C	T	T	T	T	T	T	T	T	T	T	T	T	T	T	T	T	T	T	T	T	T	T	T	T	T	T	T	T	T	T	T	T	T	T	T	T	T	T	T	T	T	T	T	T	T	T
MT-3963-T-C-no-rs	3963	T	C	T	T	T	T	T	T	T	T	T	T	T	T	T	T	T	T	T	T	T	T	T	T	T	T	T	T	T	T	T	T	T	T	T	T	T	T	T	T	T	T	T	T	T	T	T	T
MT-3976-C-T-no-rs	3976	C	T	C	C	C	C	C	C	C	C	C	C	C	C	C	C	C	C	C	C	C	C	C	C	C	C	C	C	C	C	C	C	C	C	C	C	C	C	C	C	C	C	C	C	C	C	C	C
MT-4000-A-G-no-rs	4000	A	G	A	A	A	A	A	A	A	A	A	A	A	A	A	A	A	A	A	A	A	A	A	A	A	A	A	A	A	A	A	A	A	A	A	A	A	A	A	A	A	A	A	A	A	A	A	A
MT-4001-T-C-no-rs	4001	T	C	T	T	T	T	T	T	T	T	T	T	T	T	T	T	T	T	T	T	T	T	T	T	T	T	T	T	T	T	T	T	T	T	T	T	T	T	T	T	T	T	T	T	T	T	T	T
MT-4035-T-C-no-rs	4035	T	C	T	T	T	T	T	T	T	T	T	T	T	T	T	T	T	T	T	T	T	T	T	T	T	T	T	T	T	T	T	T	T	T	T	T	T	T	T	T	T	T	T	T	T	T	T	T
MT-4062-T-C-rs396629436	4062	T	C	T	C	C	C	C	C	C	C	C	C	C	C	C	C	C	C	C	C	C	C	C	C	C	C	C	C	C	C	C	C	C	C	C	C	C	C	C	C	C	C	C	C	C	C	C	C
MT-4063-A-G-rs869311937	4063	A	G	A	A	A	A	A	A	A	A	A	A	A	A	A	A	A	A	A	A	A	A	A	A	A	A	A	A	A	A	A	A	A	A	A	A	A	A	A	A	A	A	A	A	A	A	A	A
MT-4077-G-A-no-rs	4077	G	A	G	G	G	G	G	G	G	G	G	G	G	G	G	G	G	G	G	G	G	G	G	G	G	G	G	G	G	G	G	G	G	G	G	G	G	G	G	G	G	G	G	G	G	G	G	G
MT-4090-A-G-no-rs	4090	A	G	A	A	A	A	A	A	A	A	A	A	A	A	A	A	A	A	A	A	A	A	A	A	A	A	A	A	A	A	A	A	A	A	A	A	A	A	A	A	A	A	A	A	A	A	A	A
MT-4092-C-T-no-rs	4092	C	T	C	C	C	C	C	C	C	C	C	C	C	C	C	C	C	C	C	C	C	C	C	C	C	C	C	C	C	C	C	C	C	C	C	C	C	C	C	C	C	C	C	C	C	C	C	C
MT-4098-A-G-no-rs	4098	A	G	A	A	A	A	A	A	A	A	A	A	A	A	A	A	A	A	A	A	A	A	A	A	A	A	A	A	A	A	A	A	A	A	A	A	A	A	A	A	A	A	A	A	A	A	A	A
MT-4110-A-G-no-rs	4110	A	G	A	A	A	A	A	A	A	A	A	A	A	A	A	A	A	A	A	A	A	A	A	A	A	A	A	A	A	A	A	A	A	A	A	A	A	A	A	A	A	A	A	A	A	A	A	A
MT-4113-T-C-no-rs	4113	T	C	T	T	T	T	T	T	T	T	T	T	T	T	T	T	T	T	T	T	T	T	T	T	T	T	T	T	T	T	T	T	T	T	T	T	T	T	T	T	T	T	T	T	T	T	T	T
MT-4116-T-C-no-rs	4116	T	C	T	T	T	T	T	T	T	T	T	T	T	T	T	T	T	T	T	T	T	T	T	T	T	T	T	T	T	T	T	T	T	T	T	T	T	T	T	T	T	T	T	T	T	T	T	T
MT-4128-C-T-no-rs	4128	C	T	C	C	C	C	C	C	C	C	C	C	C	C	C	C	C	C	C	C	C	C	C	C	C	C	C	C	C	C	C	C	C	C	C	C	C	C	C	C	C	C	C	C	C	C	C	C
MT-4137-A-C-no-rs	4137	A	C	A	A	A	A	A	A	A	A	A	A	A	A	A	A	A	A	A	A	A	A	A	A	A	A	A	A	A	A	A	A	A	A	A	A	A	A	A	A	A	A	A	A	A	A	A	A
MT-4143-C-T-no-rs	4143	C	T	C	C	C	C	C	C	C	C	C	C	C	C	C	C	C	C	C	C	C	C	C	C	C	C	C	C	C	C	C	C	C	C	C	C	C	C	C	C	C	C	C	C	C	C	C	C
MT-4164-T-C-no-rs	4164	T	C	T	T	T	T	T	T	T	T	T	T	T	T	T	T	T	T	T	T	T	T	T	T	T	T	T	T	T	T	T	T	T	T	T	T	T	T	T	T	T	T	T	T	T	T	T	T
MT-4170-C-T-no-rs	4170	C	T	C	C	C	C	C	C	C	C	C	C	C	C	C	C	C	C	C	C	C	C	C	C	C	C	C	C	C	C	C	C	C	C	C	C	C	C	C	C	C	C	C	C	C	C	C	C
MT-4182-C-T-no-rs	4182	C	T	C	C	C	C	C	C	C	C	C	C	C	C	C	C	C	C	C	C	C	C	C	C	C	C	C	C	C	C	C	C	C	C	C	C	C	C	C	C	C	C	C	C	C	C	C	C
MT-4201-G-A-no-rs	4201	G	A	G	G	G	G	G	G	G	G	G	G	G	G	G	G	G	G	G	G	G	G	G	G	G	G	G	G	G	G	G	G	G	G	G	G	G	G	G	G	G	G	G	G	G	G	G	G
MT-4206-C-T-no-rs	4206	C	T	C	C	C	C	C	C	C	C	C	C	C	C	C	C	C	C	C	C	C	C	C	C	C	C	C	C	C	C	C	C	C	C	C	C	C	C	C	C	C	C	C	C	C	C	C	C
MT-4227-T-C-no-rs	4227	T	C	T	T	T	T	T	T	T	T	T	T	T	T	T	T	T	T	T	T	T	T	T	T	T	T	T	T	T	T	T	T	T	T	T	T	T	T	T	T	T	T	T	T	T	T	T	T
MT-4235-C-T-no-rs	4235	C	T	C	C	C	C	C	C	C	C	C	C	C	C	C	C	C	C	C	C	C	C	C	C	C	C	C	C	C	C	C	C	C	C	C	C	C	C	C	C	C	C	C	C	C	C	C	C
MT-4239-T-C-no-rs	4239	T	C	T	T	T	T	T	T	T	T	T	T	T	T	T	T	T	T	T	T	T	T	T	T	T	T	T	T	T	T	T	T	T	T	T	T	T	T	T	T	T	T	T	T	T	T	T	T
MT-4260-C-G-no-rs	4260	C	G	C	C	C	C	C	C	C	C	C	C	C	C	C	C	C	C	C	C	C	C	C	C	C	C	C	C	C	C	C	C	C	C	C	C	C	C	C	C	C	C	C	C	C	C	C	C
MT-4272-C-T-no-rs	4272	C	T	C	C	C	C	C	C	C	C	C	C	C	C	C	C	C	C	C	C	C	C	C	C	C	C	C	C	C	C	C	C	C	C	C	C	C	C	C	C	C	C	C	C	C	C	C	C
MT-4281-A-G-no-rs	4281	A	G	A	A	A	A	A	A	A	A	A	A	A	A	A	A	A	A	A	A	A	A	A	A	A	A	A	A	A	A	A	A	A	A	A	A	A	A	A	A	A	A	A	A	A	A	A	A
MT-4296-G-A-no-rs	4296	G	A	G	G	G	G	G	G	G	G	G	G	G	G	G	G	G	G	G	G	G	G	G	G	G	G	G	G	G	G	G	G	G	G	G	G	G	G	G	G	G	G	G	G	G	G	G	G
MT-4306-T-C-no-rs	4306	T	C	T	T	T	T	T	T	T	T	T	T	T	T	T	T	T	T	T	T	T	T	T	T	T	T	T	T	T	T	T	T	T	T	T	T	T	T	T	T	T	T	T	T	T	T	T	T
MT-4317-T-C-no-rs	4317	T	C	T	T	T	T	T	T	T	T	T	T	T	T	T	T	T	T	T	T	T	T	T	T	T	T	T	T	T	T	T	T	T	T	T	T	T	T	T	T	T	T	T	T	T	T	T	T
MT-4324-C-T-no-rs	4324	C	T	C	C	C	C	C	C	C	C	C	C	C	C	C	C	C	C	C	C	C	C	C	C	C	C	C	C	C	C	C	C	C	C	C	C	C	C	C	C	C	C	C	C	C	C	C	C
MT-4329-T-C-no-rs	4329	T	C	T	T	T	T	T	T	T	T	T	T	T	T	T	T	T	T	T	T	T	T	T	T	T	T	T	T	T	T	T	T	T	T	T	T	T	T	T	T	T	T	T	T	T	T	T	T
MT-4332-A-G-no-rs	4332	A	G	A	A	A	A	A	A	A	A	A	A	A	A	A	A	A	A	A	A	A	A	A	A	A	A	A	A	A	A	A	A	A	A	A	A	A	A	A	A	A	A	A	A	A	A	A	A
MT-4383-T-C-no-rs	4383	T	C	T	T	T	T	T	T	T	T	T	T	T	T	T	T	T	T	T	T	T	T	T	T	T	T	T	T	T	T	T	T	T	T	T	T	T	T	T	T	T	T	T	T	T	T	T	T
MT-4392-T-C-rs869311938	4392	T	C	T	T	T	T	T	T	T	T	T	T	T	T	T	T	T	T	T	T	T	T	T	T	T	T	T	T	T	T	T	T	T	T	T	T	T	T	T	T	T	T	T	T	T	T	T	T
MT-4396-T-C-no-rs	4396	T	C	T	T	T	T	T	T	T	T	T	T	T	T	T	T	T	T	T	T	T	T	T	T	T	T	T	T	T	T	T	T	T	T	T	T	T	T	T	T	T	T	T	T	T	T	T	T
MT-4399-T-C-no-rs	4399	T	C	T	T	T	T	T	T	T	T	T	T	T	T	T	T	T	T	T	T	T	T	T	T	T	T	T	T	T	T	T	T	T	T	T	T	T	T	T	T	T	T	T	T	T	T	T	T
MT-4413-A-G-no-rs	4413	A	G	A	A	A	A	A	A	A	A	A	A	A	A	A	A	A	A	A	A	A	A	A	A	A	A	A	A	A	A	A	A	A	A	A	A	A	A	A	A	A	A	A	A	A	A	A	A
MT-4416-G-A-no-rs	4416	G	A	G	G	G	G	G	G	G	G	G	G	G	G	G	G	G	G	G	G	G	G	G	G	G	G	G	G	G	G	G	G	G	G	G	G	G	G	G	G	G	G	G	G	G	G	G	G
MT-4428-A-G-no-rs	4428	A	G	A	A	A	A	A	A	A	A	A	A	A	A	A	A	A	A	A	A	A	A	A	A	A	A	A	A	A	A	A	A	A	A	A	A	A	A	A	A	A	A	A	A	A	A	A	A
MT-4440-C-T-no-rs	4440	C	T	C	C	C	C	C	C	C	C	C	C	C	C	C	C	C	C	C	C	C	C	C	C	C	C	C	C	C	C	C	C	C	C	C	C	C	C	C	C	C	C	C	C	C	C	C	C
MT-4443-T-C-no-rs	4443	T	C	T	T	T	T	T	T	T	T	T	T	T	T	T	T	T	T	T	T	T	T	T	T	T	T	T	T	T	T	T	T	T	T	T	T	T	T	T	T	T	T	T	T	T	T	T	T
MT-4446-C-T-no-rs	4446	C	T	C	C	C	C	C	C	C	C	C	C	C	C	C	C	C	C	C	C	C	C	C	C	C	C	C	C	C	C	C	C	C	C	C	C	C	C	C	C	C	C	C	C	C	C	C	C
MT-4459-C-T-no-rs	4459	C	T	C	C	C	C	C	C	C	C	C	C	C	C	C	C	C	C	C	C	C	C	C	C	C	C	C	C	C	C	C	C	C	C	C	C	C	C	C	C	C	C	C	C	C	C	C	C
MT-4470-C-T-no-rs	4470	C	T	C	C	C	C	C	C	C	C	C	C	C	C	C	C	C	C	C	C	C	C	C	C	C	C	C	C	C	C	C	C	C	C	C	C	C	C	C	C	C	C	C	C	C	C	C	C
MT-4473-A-G-no-rs	4473	A	G	A	A	A	A	A	A	A	A	A	A	A	A	A	A	A	A	A	A	A	A	A	A	A	A	A	A	A	A	A	A	A	A	A	A	A	A	A	A	A	A	A	A	A	A	A	A
MT-4488-C-T-no-rs	4488	C	T	C	C	C	C	C	C	C	C	C	C	C	C	C	C	C	C	C	C	C	C	C	C	C	C	C	C	C	C	C	C	C	C	C	C	C	C	C	C	C	C	C	C	C	C	C	C
MT-4491-G-C-no-rs	4491	G	C	G	G	G	G	G	G	G	G	G	G	G	G	G	G	G	G	G	G	G	G	G	G	G	G	G	G	G	G	G	G	G	G	G	G	G	G	G	G	G	G	G	G	G	G	G	G
MT-4507-A-G-no-rs	4507	A	G	A	A	A	A	A	A	A	A	A	A	A	A	A	A	A	A	A	A	A	A	A	A	A	A	A	A	A	A	A	A	A	A	A	A	A	A	A	A	A	A	A	A	A	A	A	A
MT-4512-T-C-no-rs	4512	T	C	T	T	T	T	T	T	T	T	T	T	T	T	T	T	T	T	T	T	T	T	T	T	T	T	T	T	T	T	T	T	T	T	T	T	T	T	T	T	T	T	T	T	T	T	T	T
MT-4513-G-A-no-rs	4513	G	A	G	G	G	G	G	G	G	G	G	G	G	G	G	G	G	G	G	G	G	G	G	G	G	G	G	G	G	G	G	G	G	G	G	G	G	G	G	G	G	G	G	G	G	G	G	G
MT-4516-C-T-no-rs	4516	C	T	C	C	C	C	C	C	C	C	C	C	C	C	C	C	C	C	C	C	C	C	C	C	C	C	C	C	C	C	C	C	C	C	C	C	C	C	C	C	C	C	C	C	C	C	C	C
MT-4520-T-C-no-rs	4520	T	C	T	T	T	T	T	T	T	T	T	T	T	T	T	T	T	T	T	T	T	T	T	T	T	T	T	T	T	T	T	T	T	T	T	T	T	T	T	T	T	T	T	T	T	T	T	T
MT-4521-A-G-no-rs	4521	A	G	A	A	A	A	A	A	A	A	A	A	A	A	A	A	A	A	A	A	A	A	A	A	A	A	A	A	A	A	A	A	A	A	A	A	A	A	A	A	A	A	A	A	A	A	A	A
MT-4524-T-C-no-rs	4524	T	C	T	T	T	T	T	T	T	T	T	T	T	T	T	T	T	T	T	T	T	T	T	T	T	T	T	T	T	T	T	T	T	T	T	T	T	T	T	T	T	T	T	T	T	T	T	T
MT-4526-A-G-no-rs	4526	A	G	A	A	A	A	A	A	A	A	A	A	A	A	A	A	A	A	A	A	A	A	A	A	A	A	A	A	A	A	A	A	A	A	A	A	A	A	A	A	A	A	A	A	A	A	A	A
MT-4536-A-G-rs393899179	4536	A	G	A	A	G	A	G	G	G	G	A	A	A	A	A	A	A	G	A	G	A	A	A	A	A	G	A	G	G	G	A	A	G	A	A	G	A	G	A	G	A	A	A	A	A	A	G	G
MT-4552-T-C-no-rs	4552	T	C	T	T	T	T	T	T	T	T	T	T	T	T	T	T	T	T	T	T	T	T	T	T	T	T	T	T	T	T	T	T	T	T	T	T	T	T	T	T	T	T	T	T	T	T	T	T
MT-4590-A-G-no-rs	4590	A	G	A	A	A	A	A	A	A	A	A	A	A	A	A	A	A	A	A	A	A	A	A	A	A	A	A	A	A	A	A	A	A	A	A	A	A	A	A	A	A	A	A	A	A	A	A	A
MT-4605-C-T-no-rs	4605	C	T	C	C	T	C	T	T	T	T	C	C	C	C	C	C	C	T	C	T	C	C	C	C	C	T	C	T	T	T	C	C	T	C	C	T	C	T	C	T	C	C	C	C	C	C	T	T
MT-4608-T-C-no-rs	4608	T	C	T	T	T	T	T	T	T	T	T	T	T	T	T	T	T	T	T	T	T	T	T	T	T	T	T	T	T	T	T	T	T	T	T	T	T	T	T	T	T	T	T	T	T	T	T	T
MT-4611-T-C-no-rs	4611	T	C	T	T	T	T	T	T	T	T	T	T	T	T	T	T	T	T	T	T	T	T	T	T	T	T	T	T	T	T	T	T	T	T	T	T	T	T	T	T	T	T	T	T	T	T	T	T
MT-4629-C-A-no-rs	4629	C	A	C	C	C	C	C	C	C	C	C	C	C	C	C	C	C	C	C	C	C	C	C	C	C	C	C	C	C	C	C	C	C	C	C	C	C	C	C	C	C	C	C	C	C	C	C	C
MT-4646-T-C-rs395440225	4646	T	C	T	C	C	C	C	C	C	C	C	C	C	C	C	C	C	C	C	C	C	C	C	T	C	C	C	C	C	C	C	C	C	C	C	C	C	C	C	C	C	C	C	C	C	C	C	C
MT-4655-C-T-no-rs	4655	C	T	C	C	C	C	C	C	C	C	C	C	C	C	C	C	C	C	C	C	C	C	C	C	C	C	C	C	C	C	C	C	C	C	C	C	C	C	C	C	C	C	C	C	C	C	C	C
MT-4659-T-C-no-rs	4659	T	C	T	T	T	T	T	T	T	T	T	T	T	T	T	T	T	T	T	T	T	T	T	T	T	T	T	T	T	T	T	T	T	T	T	T	T	T	T	T	T	T	T	T	T	T	T	T
MT-4669-T-C-rs396436899	4669	T	C	T	C	C	C	C	C	C	C	C	C	C	C	C	C	C	C	C	C	C	C	C	T	C	C	C	C	C	C	C	C	C	C	C	C	C	C	C	C	C	C	C	C	C	C	C	C
MT-4674-T-C-no-rs	4674	T	C	T	T	T	T	T	T	T	T	T	T	T	T	T	T	T	T	T	T	T	T	T	T	T	T	T	T	T	T	T	T	T	T	T	T	T	T	T	T	T	T	T	T	T	T	T	T
MT-4680-A-G-no-rs	4680	A	G	A	A	A	A	A	A	A	A	A	A	A	A	A	A	A	A	A	A	A	A	A	A	A	A	A	A	A	A	A	A	A	A	A	A	A	A	A	A	A	A	A	A	A	A	A	A
MT-4686-C-T-no-rs	4686	C	T	C	C	C	C	C	C	C	C	C	C	C	C	C	C	C	C	C	C	C	C	C	C	C	C	C	C	C	C	C	C	C	C	C	C	C	C	C	C	C	C	C	C	C	C	C	C
MT-4701-C-T-no-rs	4701	C	T	C	C	C	C	C	C	C	C	C	C	C	C	C	C	C	C	C	C	C	C	C	C	C	C	C	C	C	C	C	C	C	C	C	C	C	C	C	C	C	C	C	C	C	C	C	C
MT-4717-A-G-no-rs	4717	A	G	A	A	A	A	A	A	A	A	A	A	A	A	A	A	A	A	A	A	A	A	A	A	A	A	A	A	A	A	A	A	A	A	A	A	A	A	A	A	A	A	A	A	A	A	A	A
MT-4731-A-G-no-rs	4731	A	G	A	A	A	A	A	A	A	A	A	A	A	A	A	A	A	A	A	A	A	A	A	A	A	A	A	A	A	A	A	A	A	A	A	A	A	A	A	A	A	A	A	A	A	A	A	A
MT-4737-T-C-no-rs	4737	T	C	T	T	T	T	T	T	T	T	T	T	T	T	T	T	T	T	T	T	T	T	T	T	T	T	T	T	T	T	T	T	T	T	T	T	T	T	T	T	T	T	T	T	T	T	T	T
MT-4743-G-A-no-rs	4743	G	A	G	G	G	G	G	G	G	G	G	G	G	G	G	G	G	G	G	G	G	G	G	G	G	G	G	G	G	G	G	G	G	G	G	G	G	G	G	G	G	G	G	G	G	G	G	G
MT-4755-T-C-no-rs	4755	T	C	T	T	T	T	T	T	T	T	T	T	T	T	T	T	T	T	T	T	T	T	T	T	T	T	T	T	T	T	T	T	T	T	T	T	T	T	T	T	T	T	T	T	T	T	T	T
MT-4767-C-T-no-rs	4767	C	T	C	C	C	C	C	C	C	C	C	C	C	C	C	C	C	C	C	C	C	C	C	C	C	C	C	C	C	C	C	C	C	C	C	C	C	C	C	C	C	C	C	C	C	C	C	C
MT-4776-A-C-no-rs	4776	A	C	A	A	A	A	A	A	A	A	A	A	A	A	A	A	A	A	A	A	A	A	A	A	A	A	A	A	A	A	A	A	A	A	A	A	A	A	A	A	A	A	A	A	A	A	A	A
MT-4782-A-G-no-rs	4782	A	G	A	A	A	A	A	A	A	A	A	A	A	A	A	A	A	A	A	A	A	A	A	A	A	A	A	A	A	A	A	A	A	A	A	A	A	A	A	A	A	A	A	A	A	A	A	A
MT-4785-C-T-no-rs	4785	C	T	C	C	C	C	C	C	C	C	C	C	C	C	C	C	C	C	C	C	C	C	C	C	C	C	C	C	C	C	C	C	C	C	C	C	C	C	C	C	C	C	C	C	C	C	C	C
MT-4794-A-T-no-rs	4794	A	T	A	A	A	A	A	A	A	A	A	A	A	A	A	A	A	A	A	A	A	A	A	A	A	A	A	A	A	A	A	A	A	A	A	A	A	A	A	A	A	A	A	A	A	A	A	A
MT-4803-C-T-no-rs	4803	C	T	C	C	C	C	C	C	C	C	C	C	C	C	C	C	C	C	C	C	C	C	C	C	C	C	C	C	C	C	C	C	C	C	C	C	C	C	C	C	C	C	C	C	C	C	C	C
MT-4818-A-G-no-rs	4818	A	G	A	A	A	A	A	A	A	A	A	A	A	A	A	A	A	A	A	A	A	A	A	A	A	A	A	A	A	A	A	A	A	A	A	A	A	A	A	A	A	A	A	A	A	A	A	A
MT-4830-T-C-rs869311939	4830	T	C	T	C	T	C	T	T	T	T	C	C	C	C	C	C	C	T	C	T	C	C	C	T	C	T	C	T	T	T	C	C	T	C	C	T	C	T	C	T	C	C	C	C	C	C	T	T
MT-4839-A-C-no-rs	4839	A	C	A	A	A	A	A	A	A	A	A	A	A	A	A	A	A	A	A	A	A	A	A	A	A	A	A	A	A	A	A	A	A	A	A	A	A	A	A	A	A	A	A	A	A	A	A	A
MT-4842-G-A-no-rs	4842	G	A	G	G	G	G	G	G	G	G	G	G	G	G	G	G	G	G	G	G	G	G	G	G	G	G	G	G	G	G	G	G	G	G	G	G	G	G	G	G	G	G	G	G	G	G	G	G
MT-4845-C-T-no-rs	4845	C	T	C	C	C	C	C	C	C	C	C	C	C	C	C	C	C	C	C	C	C	C	C	C	C	C	C	C	C	C	C	C	C	C	C	C	C	C	C	C	C	C	C	C	C	C	C	C
MT-4851-C-T-no-rs	4851	C	T	C	C	C	C	C	C	C	C	C	C	C	C	C	C	C	C	C	C	C	C	C	C	C	C	C	C	C	C	C	C	C	C	C	C	C	C	C	C	C	C	C	C	C	C	C	C
MT-4859-C-T-no-rs	4859	C	T	C	C	C	C	C	C	C	C	C	C	C	C	C	C	C	C	C	C	C	C	C	C	C	C	C	C	C	C	C	C	C	C	C	C	C	C	C	C	C	C	C	C	C	C	C	C
MT-4863-C-T-no-rs	4863	C	T	C	C	C	C	C	C	C	C	C	C	C	C	C	C	C	C	C	C	C	C	C	C	C	C	C	C	C	C	C	C	C	C	C	C	C	C	C	C	C	C	C	C	C	C	C	C
MT-4866-C-T-no-rs	4866	C	T	C	C	C	C	C	C	C	C	C	C	C	C	C	C	C	C	C	C	C	C	C	C	C	C	C	C	C	C	C	C	C	C	C	C	C	C	C	C	C	C	C	C	C	C	C	C
MT-4884-A-G-no-rs	4884	A	G	A	A	A	A	A	A	A	A	A	A	A	A	A	A	A	A	A	A	A	A	A	A	A	A	A	A	A	A	A	A	A	A	A	A	A	A	A	A	A	A	A	A	A	A	A	A
MT-4893-C-T-no-rs	4893	C	T	C	C	C	C	C	C	C	C	C	C	C	C	C	C	C	C	C	C	C	C	C	C	C	C	C	C	C	C	C	C	C	C	C	C	C	C	C	C	C	C	C	C	C	C	C	C
MT-4898-G-A-no-rs	4898	G	A	G	G	G	G	G	G	G	G	G	G	G	G	G	G	G	G	G	G	G	G	G	G	G	G	G	G	G	G	G	G	G	G	G	G	G	G	G	G	G	G	G	G	G	G	G	G
MT-4905-T-C-no-rs	4905	T	C	T	T	T	T	T	T	T	T	T	T	T	T	T	T	T	T	T	T	T	T	T	T	T	T	T	T	T	T	T	T	T	T	T	T	T	T	T	T	T	T	T	T	T	T	T	T
MT-4909-T-C-no-rs	4909	T	C	T	T	T	T	T	T	T	T	T	T	T	T	T	T	T	T	T	T	T	T	T	T	T	T	T	T	T	T	T	T	T	T	T	T	T	T	T	T	T	T	T	T	T	T	T	T
MT-4917-G-A-no-rs	4917	G	A	G	G	G	G	G	G	G	G	G	G	G	G	G	G	G	G	G	G	G	G	G	G	G	G	G	G	G	G	G	G	G	G	G	G	G	G	G	G	G	G	G	G	G	G	G	G
MT-4926-T-C-no-rs	4926	T	C	T	T	T	T	T	T	T	T	T	T	T	T	T	T	T	T	T	T	T	T	T	T	T	T	T	T	T	T	T	T	T	T	T	T	T	T	T	T	T	T	T	T	T	T	T	T
MT-4927-A-G-no-rs	4927	A	G	A	A	A	A	A	A	A	A	A	A	A	A	A	A	A	A	A	A	A	A	A	A	A	A	A	A	A	A	A	A	A	A	A	A	A	A	A	A	A	A	A	A	A	A	A	A
MT-4932-C-T-no-rs	4932	C	T	C	C	C	C	C	C	C	C	C	C	C	C	C	C	C	C	C	C	C	C	C	C	C	C	C	C	C	C	C	C	C	C	C	C	C	C	C	C	C	C	C	C	C	C	C	C
MT-4944-C-T-no-rs	4944	C	T	C	C	C	C	C	C	C	C	C	C	C	C	C	C	C	C	C	C	C	C	C	C	C	C	C	C	C	C	C	C	C	C	C	C	C	C	C	C	C	C	C	C	C	C	C	C
MT-4962-A-G-no-rs	4962	A	G	A	A	A	A	A	A	A	A	A	A	A	A	A	A	A	A	A	A	A	A	A	A	A	A	A	A	A	A	A	A	A	A	A	A	A	A	A	A	A	A	A	A	A	A	A	A
MT-4969-T-C-no-rs	4969	T	C	T	T	T	T	T	T	T	T	T	T	T	T	T	T	T	T	T	T	T	T	T	T	T	T	T	T	T	T	T	T	T	T	T	T	T	T	T	T	T	T	T	T	T	T	T	T
MT-5017-T-C-no-rs	5017	T	C	T	T	T	T	T	T	T	T	T	T	T	T	T	T	T	T	T	T	T	T	T	T	T	T	T	T	T	T	T	T	T	T	T	T	T	T	T	T	T	T	T	T	T	T	T	T
MT-5029-A-T-no-rs	5029	A	T	A	A	A	A	A	A	A	A	A	A	A	A	A	A	A	A	A	A	A	A	A	A	A	A	A	A	A	A	A	A	A	A	A	A	A	A	A	A	A	A	A	A	A	A	A	A
MT-5032-C-T-no-rs	5032	C	T	C	C	C	C	C	C	C	C	C	C	C	C	C	C	C	C	C	C	C	C	C	C	C	C	C	C	C	C	C	C	C	C	C	C	C	C	C	C	C	C	C	C	C	C	C	C
MT-5048-T-C-no-rs	5048	T	C	T	T	T	T	T	T	T	T	T	T	T	T	T	T	T	T	T	T	T	T	T	T	T	T	T	T	T	T	T	T	T	T	T	T	T	T	T	T	T	T	T	T	T	T	T	T
MT-5070-T-C-no-rs	5070	T	C	T	T	T	T	T	T	T	T	T	T	T	T	T	T	T	T	T	T	T	T	T	T	T	T	T	T	T	T	T	T	T	T	T	T	T	T	T	T	T	T	T	T	T	T	T	T
MT-5098-T-A-rs393792938	5098	T	A	A	A	A	A	A	A	A	A	A	A	A	A	A	A	A	A	A	A	A	A	A	A	A	A	A	A	A	A	A	A	A	A	A	A	A	A	A	A	A	A	A	A	A	A	A	A
MT-5103-T-C-no-rs	5103	T	C	T	T	T	T	T	T	T	T	T	T	T	T	T	T	T	T	T	T	T	T	T	T	T	T	T	T	T	T	T	T	T	T	T	T	T	T	T	T	T	T	T	T	T	T	T	T
MT-5162-G-A-no-rs	5162	G	A	G	G	G	G	G	G	G	G	G	G	G	G	G	G	G	G	G	G	G	G	G	G	G	G	G	G	G	G	G	G	G	G	G	G	G	G	G	G	G	G	G	G	G	G	G	G
MT-5168-T-C-no-rs	5168	T	C	T	T	T	T	T	T	T	T	T	T	T	T	T	T	T	T	T	T	T	T	T	T	T	T	T	T	T	T	T	T	T	T	T	T	T	T	T	T	T	T	T	T	T	T	T	T
MT-5175-A-T-no-rs	5175	A	T	A	A	A	A	A	A	A	A	A	A	A	A	A	A	A	A	A	A	A	A	A	A	A	A	A	A	A	A	A	A	A	A	A	A	A	A	A	A	A	A	A	A	A	A	A	A
MT-5252-C-T-no-rs	5252	C	T	C	C	C	C	C	C	C	C	C	C	C	C	C	C	C	C	C	C	C	C	C	C	C	C	C	C	C	C	C	C	C	C	C	C	C	C	C	C	C	C	C	C	C	C	C	C
MT-5272-T-C-no-rs	5272	T	C	T	T	T	T	T	T	T	T	T	T	T	T	T	T	T	T	T	T	T	T	T	T	T	T	T	T	T	T	T	T	T	T	T	T	T	T	T	T	T	T	T	T	T	T	T	T
MT-5288-G-A-no-rs	5288	G	A	G	G	G	G	G	G	G	G	G	G	G	G	G	G	G	G	G	G	G	G	G	G	G	G	G	G	G	G	G	G	G	G	G	G	G	G	G	G	G	G	G	G	G	G	G	G
MT-5289-G-A-no-rs	5289	G	A	G	G	G	G	G	G	G	G	G	G	G	G	G	G	G	G	G	G	G	G	G	G	G	G	G	G	G	G	G	G	G	G	G	G	G	G	G	G	G	G	G	G	G	G	G	G
MT-5370-C-T-no-rs	5370	C	T	C	C	C	C	C	C	C	C	C	C	C	C	C	C	C	C	C	C	C	C	C	C	C	C	C	C	C	C	C	C	C	C	C	C	C	C	C	C	C	C	C	C	C	C	C	C
MT-5380-C-T-no-rs	5380	C	T	C	C	C	C	C	C	C	C	C	C	C	C	C	C	C	C	C	C	C	C	C	C	C	C	C	C	C	C	C	C	C	C	C	C	C	C	C	C	C	C	C	C	C	C	C	C
MT-5418-C-T-no-rs	5418	C	T	C	C	C	C	C	C	C	C	C	C	C	C	C	C	C	C	C	C	C	C	C	C	C	C	C	C	C	C	C	C	C	C	C	C	C	C	C	C	C	C	C	C	C	C	C	C
MT-5454-T-C-no-rs	5454	T	C	T	T	T	T	T	T	T	T	T	T	T	T	T	T	T	T	T	T	T	T	T	T	T	T	T	T	T	T	T	T	T	T	T	T	T	T	T	T	T	T	T	T	T	T	T	T
MT-5487-C-T-no-rs	5487	C	T	C	C	C	C	C	C	C	C	C	C	C	C	C	C	C	C	C	C	C	C	C	C	C	C	C	C	C	C	C	C	C	C	C	C	C	C	C	C	C	C	C	C	C	C	C	C
MT-5499-C-T-no-rs	5499	C	T	C	C	C	C	C	C	C	C	C	C	C	C	C	C	C	C	C	C	C	C	C	C	C	C	C	C	C	C	C	C	C	C	C	C	C	C	C	C	C	C	C	C	C	C	C	C
MT-5500-C-T-no-rs	5500	C	T	N	T	C	T	C	C	C	C	T	T	T	T	T	T	T	C	T	C	T	T	T	C	T	C	T	C	C	C	T	T	C	T	T	N	T	C	T	C	T	T	T	T	T	T	C	C
MT-5505-A-G-no-rs	5505	A	G	A	A	A	A	A	A	A	A	A	A	A	A	A	A	A	A	A	A	A	A	A	A	A	A	A	A	A	A	A	A	A	A	A	A	A	A	A	A	A	A	A	A	A	A	A	A
MT-5538-C-T-no-rs	5538	C	T	C	C	C	C	C	C	C	C	C	C	C	C	C	C	C	C	C	C	C	C	C	C	C	C	C	C	C	C	C	C	C	C	C	C	C	C	C	C	C	C	C	C	C	C	C	C
MT-5559-T-C-no-rs	5559	T	C	T	T	T	T	T	T	T	T	T	T	T	T	T	T	T	T	T	T	T	T	T	T	T	T	T	T	T	T	T	T	T	T	T	T	T	T	T	T	T	T	T	T	T	T	T	T
MT-5565-T-C-no-rs	5565	T	C	T	T	T	T	T	T	T	T	T	T	T	T	T	T	T	T	T	T	T	T	T	T	T	T	T	T	T	T	T	T	T	T	T	T	T	T	T	T	T	T	T	T	T	T	T	T
MT-5568-G-A-no-rs	5568	G	A	G	G	G	G	G	G	G	G	G	G	G	G	G	G	G	G	G	G	G	G	G	G	G	G	G	G	G	G	G	G	G	G	G	G	G	G	G	G	G	G	G	G	G	G	G	G
MT-5571-C-T-no-rs	5571	C	T	C	C	C	C	C	C	C	C	C	C	C	C	C	C	C	C	C	C	C	C	C	C	C	C	C	C	C	C	C	C	C	C	C	C	C	C	C	C	C	C	C	C	C	C	C	C
MT-5574-A-T-no-rs	5574	A	T	A	A	A	A	A	A	A	A	A	A	A	A	A	A	A	A	A	A	A	A	A	A	A	A	A	A	A	A	A	A	A	A	A	A	A	A	A	A	A	A	A	A	A	A	A	A
MT-5580-T-C-no-rs	5580	T	C	T	T	T	T	T	T	T	T	T	T	T	T	T	T	T	T	T	T	T	T	T	T	T	T	T	T	T	T	T	T	T	T	T	T	T	T	T	T	T	T	T	T	T	T	T	T
MT-5583-A-G-no-rs	5583	A	G	A	A	A	A	A	A	A	A	A	A	A	A	A	A	A	A	A	A	A	A	A	A	A	A	A	A	A	A	A	A	A	A	A	A	A	A	A	A	A	A	A	A	A	A	A	A
MT-5595-C-T-no-rs	5595	C	T	C	C	C	C	C	C	C	C	C	C	C	C	C	C	C	C	C	C	C	C	C	C	C	C	C	C	C	C	C	C	C	C	C	C	C	C	C	C	C	C	C	C	C	C	C	C
MT-5598-A-G-no-rs	5598	A	G	A	A	A	A	A	A	A	A	A	A	A	A	A	A	A	A	A	A	A	A	A	A	A	A	A	A	A	A	A	A	A	A	A	A	A	A	A	A	A	A	A	A	A	A	A	A
MT-5610-C-T-no-rs	5610	C	T	C	C	C	C	C	C	C	C	C	C	C	C	C	C	C	C	C	C	C	C	C	C	C	C	C	C	C	C	C	C	C	C	C	C	C	C	C	C	C	C	C	C	C	C	C	C
MT-5614-C-T-no-rs	5614	C	T	C	C	C	C	C	C	C	C	C	C	C	C	C	C	C	C	C	C	C	C	C	C	C	C	C	C	C	C	C	C	C	C	C	C	C	C	C	C	C	C	C	C	C	C	C	C
MT-5616-G-A-no-rs	5616	G	A	G	G	G	G	G	G	G	G	G	G	G	G	G	G	G	G	G	G	G	G	G	G	G	G	G	G	G	G	G	G	G	G	G	G	G	G	G	G	G	G	G	G	G	G	G	G
MT-5625-A-G-no-rs	5625	A	G	A	A	A	A	A	A	A	A	A	A	A	A	A	A	A	A	A	A	A	A	A	A	A	A	A	A	A	A	A	A	A	A	A	A	A	A	A	A	A	A	A	A	A	A	A	A
MT-5631-T-C-no-rs	5631	T	C	T	T	T	T	T	T	T	T	T	T	T	T	T	T	T	T	T	T	T	T	T	T	T	T	T	T	T	T	T	T	T	T	T	T	T	T	T	T	T	T	T	T	T	T	T	T
MT-5640-T-C-no-rs	5640	T	C	T	T	T	T	T	T	T	T	T	T	T	T	T	T	T	T	T	T	T	T	T	T	T	T	T	T	T	T	T	T	T	T	T	T	T	T	T	T	T	T	T	T	T	T	T	T
MT-5643-C-T-no-rs	5643	C	T	C	C	C	C	C	C	C	C	C	C	C	C	C	C	C	C	C	C	C	C	C	C	C	C	C	C	C	C	C	C	C	C	C	C	C	C	C	C	C	C	C	C	C	C	C	C
MT-5671-T-C-no-rs	5671	T	C	T	C	T	C	T	T	T	T	C	C	C	C	C	C	C	T	C	T	C	C	C	T	C	T	C	T	T	T	C	C	T	C	C	T	C	T	C	T	C	C	C	C	C	C	T	T
MT-5697-T-C-no-rs	5697	T	C	T	T	T	T	T	T	T	T	T	T	T	T	T	T	T	T	T	T	T	T	T	T	T	T	T	T	T	T	T	T	T	T	T	T	T	T	T	T	T	T	T	T	T	T	T	T
MT-5700-C-T-no-rs	5700	C	T	C	C	C	C	C	C	C	C	C	C	C	C	C	C	C	C	C	C	C	C	C	C	C	C	C	C	C	C	C	C	C	C	C	C	C	C	C	C	C	C	C	C	C	C	C	C
MT-5724-T-C-no-rs	5724	T	C	T	T	T	T	T	T	T	T	T	T	T	T	T	T	T	T	T	T	T	T	T	T	T	T	T	T	T	T	T	T	T	T	T	T	T	T	T	T	T	T	T	T	T	T	T	T
MT-5754-T-C-no-rs	5754	T	C	T	T	T	T	T	T	T	T	T	T	T	T	T	T	T	T	T	T	T	T	T	T	T	T	T	T	T	T	T	T	T	T	T	T	T	T	T	T	T	T	T	T	T	T	T	T
MT-5769-G-A-no-rs	5769	G	A	G	G	G	G	G	G	G	G	G	G	G	G	G	G	G	G	G	G	G	G	G	G	G	G	G	G	G	G	G	G	G	G	G	G	G	G	G	G	G	G	G	G	G	G	G	G
MT-5775-T-C-no-rs	5775	T	C	T	T	T	T	T	T	T	T	T	T	T	T	T	T	T	T	T	T	T	T	T	T	T	T	T	T	T	T	T	T	T	T	T	T	T	T	T	T	T	T	T	T	T	T	T	T
MT-5784-C-T-no-rs	5784	C	T	C	C	C	C	C	C	C	C	C	C	C	C	C	C	C	C	C	C	C	C	C	C	C	C	C	C	C	C	C	C	C	C	C	C	C	C	C	C	C	C	C	C	C	C	C	C
MT-5798-C-T-no-rs	5798	C	T	C	C	C	C	C	C	C	C	C	C	C	C	C	C	C	C	C	C	C	C	C	C	C	C	C	C	C	C	C	C	C	C	C	C	C	C	C	C	C	C	C	C	C	C	C	C
MT-5802-T-C-no-rs	5802	T	C	T	T	T	T	T	T	T	T	T	T	T	T	T	T	T	T	T	T	T	T	T	T	T	T	T	T	T	T	T	T	T	T	T	T	T	T	T	T	T	T	T	T	T	T	T	T
MT-5808-T-C-no-rs	5808	T	C	T	T	T	T	T	T	T	T	T	T	T	T	T	T	T	T	T	T	T	T	T	T	T	T	T	T	T	T	T	T	T	T	T	T	T	T	T	T	T	T	T	T	T	T	T	T
MT-5811-C-T-no-rs	5811	C	T	C	C	C	C	C	C	C	C	C	C	C	C	C	C	C	C	C	C	C	C	C	C	C	C	C	C	C	C	C	C	C	C	C	C	C	C	C	C	C	C	C	C	C	C	C	C
MT-5817-A-G-rs396911789	5817	A	G	A	A	A	A	A	A	A	A	A	A	A	A	A	A	A	A	A	A	A	A	A	A	A	A	A	A	A	A	A	A	A	A	A	A	A	A	A	A	A	A	A	A	A	A	A	A
MT-5823-G-T-no-rs	5823	G	T	G	G	G	G	G	G	G	G	G	G	G	G	G	G	G	G	G	G	G	G	G	G	G	G	G	G	G	G	G	G	G	G	G	G	G	G	G	G	G	G	G	G	G	G	G	G
MT-5829-C-T-no-rs	5829	C	T	C	C	T	C	T	T	T	T	C	C	C	C	C	C	C	T	C	T	C	C	C	C	C	T	C	T	T	T	C	C	T	C	C	T	C	T	C	T	C	C	C	C	C	C	T	T
MT-5850-C-T-no-rs	5850	C	T	C	C	C	C	C	C	C	C	C	C	C	C	C	C	C	C	C	C	C	C	C	C	C	C	C	C	C	C	C	C	C	C	C	C	C	C	C	C	C	C	C	C	C	C	C	C
MT-5853-T-C-no-rs	5853	T	C	T	T	T	T	T	T	T	T	T	T	T	T	T	T	T	T	T	T	T	T	T	T	T	T	T	T	T	T	T	T	T	T	T	T	T	T	T	T	T	T	T	T	T	T	T	T
MT-5868-T-C-no-rs	5868	T	C	T	T	T	T	T	T	T	T	T	T	T	T	T	T	T	T	T	T	T	T	T	T	T	T	T	T	T	T	T	T	T	T	T	T	T	T	T	T	T	T	T	T	T	T	T	T
MT-5886-C-T-rs394327448	5886	C	T	C	T	T	T	T	T	T	T	T	T	T	T	T	T	T	T	T	T	T	T	T	C	T	T	T	T	T	T	T	T	T	T	T	T	T	T	T	T	T	T	T	T	T	T	T	T
MT-5904-C-T-no-rs	5904	C	T	C	C	C	C	C	C	C	C	C	C	C	C	C	C	C	C	C	C	C	C	C	C	C	C	C	C	C	C	C	C	C	C	C	C	C	C	C	C	C	C	C	C	C	C	C	C
MT-5931-T-C-no-rs	5931	T	C	T	T	T	T	T	T	T	T	T	T	T	T	T	T	T	T	T	T	T	T	T	T	T	T	T	T	T	T	T	T	T	T	T	T	T	T	T	T	T	T	T	T	T	T	T	T
MT-5955-C-T-no-rs	5955	C	T	C	C	C	C	C	C	C	C	C	C	C	C	C	C	C	C	C	C	C	C	C	C	C	C	C	C	C	C	C	C	C	C	C	C	C	C	C	C	C	C	C	C	C	C	C	C
MT-5958-C-T-no-rs	5958	C	T	C	C	C	C	C	C	C	C	C	C	C	C	C	C	C	C	C	C	C	C	C	C	C	C	C	C	C	C	C	C	C	C	C	C	C	C	C	C	C	C	C	C	C	C	C	C
MT-5961-G-A-no-rs	5961	G	A	G	G	G	G	G	G	G	G	G	G	G	G	G	G	G	G	G	G	G	G	G	G	G	G	G	G	G	G	G	G	G	G	G	G	G	G	G	G	G	G	G	G	G	G	G	G
MT-5976-C-T-no-rs	5976	C	T	C	C	C	C	C	C	C	C	C	C	C	C	C	C	C	C	C	C	C	C	C	C	C	C	C	C	C	C	C	C	C	C	C	C	C	C	C	C	C	C	C	C	C	C	C	C
MT-5982-C-T-no-rs	5982	C	T	C	C	C	C	C	C	C	C	C	C	C	C	C	C	C	C	C	C	C	C	C	C	C	C	C	C	C	C	C	C	C	C	C	C	C	C	C	C	C	C	C	C	C	C	C	C
MT-6004-C-T-no-rs	6004	C	T	C	C	C	C	C	C	C	C	C	C	C	C	C	C	C	C	C	C	C	C	C	C	C	C	C	C	C	C	C	C	C	C	C	C	C	C	C	C	C	C	C	C	C	C	C	C
MT-6006-G-A-rs395084740	6006	G	A	G	A	A	A	A	A	A	A	A	A	A	A	A	A	A	A	A	A	A	A	A	G	A	A	A	A	A	A	A	A	A	A	A	A	A	A	A	A	A	A	A	A	A	A	A	A
MT-6012-T-C-no-rs	6012	T	C	T	T	T	T	T	T	T	T	T	T	T	T	T	T	T	T	T	T	T	T	T	T	T	T	T	T	T	T	T	T	T	T	T	T	T	T	T	T	T	T	T	T	T	T	T	T
MT-6015-T-C-no-rs	6015	T	C	T	T	T	T	T	T	T	T	T	T	T	T	T	T	T	T	T	T	T	T	T	T	T	T	T	T	T	T	T	T	T	T	T	T	T	T	T	T	T	T	T	T	T	T	T	T
MT-6024-C-T-no-rs	6024	C	T	C	C	C	C	C	C	C	C	C	C	C	C	C	C	C	C	C	C	C	C	C	C	C	C	C	C	C	C	C	C	C	C	C	C	C	C	C	C	C	C	C	C	C	C	C	C
MT-6027-C-T-no-rs	6027	C	T	C	C	C	C	C	C	C	C	C	C	C	C	C	C	C	C	C	C	C	C	C	C	C	C	C	C	C	C	C	C	C	C	C	C	C	C	C	C	C	C	C	C	C	C	C	C
MT-6033-A-G-no-rs	6033	A	G	A	A	A	A	A	A	A	A	A	A	A	A	A	A	A	A	A	A	A	A	A	A	A	A	A	A	A	A	A	A	A	A	A	A	A	A	A	A	A	A	A	A	A	A	A	A
MT-6054-T-C-no-rs	6054	T	C	T	T	T	T	T	T	T	T	T	T	T	T	T	T	T	T	T	T	T	T	T	T	T	T	T	T	T	T	T	T	T	T	T	T	T	T	T	T	T	T	T	T	T	T	T	T
MT-6072-C-T-no-rs	6072	C	T	C	C	C	C	C	C	C	C	C	C	C	C	C	C	C	C	C	C	C	C	C	C	C	C	C	C	C	C	C	C	C	C	C	C	C	C	C	C	C	C	C	C	C	C	C	C
MT-6078-A-G-no-rs	6078	A	G	A	A	A	A	A	A	A	A	A	A	A	A	A	A	A	A	A	A	A	A	A	A	A	A	A	A	A	A	A	A	A	A	A	A	A	A	A	A	A	A	A	A	A	A	A	A
MT-6093-T-C-no-rs	6093	T	C	T	T	T	T	T	T	T	T	T	T	T	T	T	T	T	T	T	T	T	T	T	T	T	T	T	T	T	T	T	T	T	T	T	T	T	T	T	T	T	T	T	T	T	T	T	T
MT-6099-T-C-no-rs	6099	T	C	T	T	T	T	T	T	T	T	T	T	T	T	T	T	T	T	T	T	T	T	T	T	T	T	T	T	T	T	T	T	T	T	T	T	T	T	T	T	T	T	T	T	T	T	T	T
MT-6102-C-T-no-rs	6102	C	T	C	C	C	C	C	C	C	C	C	C	C	C	C	C	C	C	C	C	C	C	C	C	C	C	C	C	C	C	C	C	C	C	C	C	C	C	C	C	C	C	C	C	C	C	C	C
MT-6105-A-G-no-rs	6105	A	G	A	A	A	A	A	A	A	A	A	A	A	A	A	A	A	A	A	A	A	A	A	A	A	A	A	A	A	A	A	A	A	A	A	A	A	A	A	A	A	A	A	A	A	A	A	A
MT-6114-C-T-no-rs	6114	C	T	C	C	C	C	C	C	C	C	C	C	C	C	C	C	C	C	C	C	C	C	C	C	C	C	C	C	C	C	C	C	C	C	C	C	C	C	C	C	C	C	C	C	C	C	C	C
MT-6129-C-T-no-rs	6129	C	T	C	C	C	C	C	C	C	C	C	C	C	C	C	C	C	C	C	C	C	C	C	C	C	C	C	C	C	C	C	C	C	C	C	C	C	C	C	C	C	C	C	C	C	C	C	C
MT-6135-C-T-no-rs	6135	C	T	C	C	C	C	C	C	C	C	C	C	C	C	C	C	C	C	C	C	C	C	C	C	C	C	C	C	C	C	C	C	C	C	C	C	C	C	C	C	C	C	C	C	C	C	C	C
MT-6141-C-T-no-rs	6141	C	T	C	C	C	C	C	C	C	C	C	C	C	C	C	C	C	C	C	C	C	C	C	C	C	C	C	C	C	C	C	C	C	C	C	C	C	C	C	C	C	C	C	C	C	C	C	C
MT-6144-C-T-no-rs	6144	C	T	C	C	C	C	C	C	C	C	C	C	C	C	C	C	C	C	C	C	C	C	C	C	C	C	C	C	C	C	C	C	C	C	C	C	C	C	C	C	C	C	C	C	C	C	C	C
MT-6156-G-A-no-rs	6156	G	A	G	G	G	G	G	G	G	G	G	G	G	G	G	G	G	G	G	G	G	G	G	G	G	G	G	G	G	G	G	G	G	G	G	G	G	G	G	G	G	G	G	G	G	G	G	G
MT-6165-T-C-no-rs	6165	T	C	T	T	T	T	T	T	T	T	T	T	T	T	T	T	T	T	T	T	T	T	T	T	T	T	T	T	T	T	T	T	T	T	T	T	T	T	T	T	T	T	T	T	T	T	T	T
MT-6174-G-A-no-rs	6174	G	A	G	G	G	G	G	G	G	G	G	G	G	G	G	G	G	G	G	G	G	G	G	G	G	G	G	G	G	G	G	G	G	G	G	G	G	G	G	G	G	G	G	G	G	G	G	G
MT-6177-T-C-rs869311947	6177	T	C	T	T	T	T	T	T	T	T	T	T	T	T	T	T	T	T	T	T	T	T	T	T	T	T	T	T	T	T	T	T	T	T	T	T	T	T	T	T	T	T	T	T	T	T	T	T
MT-6183-G-A-no-rs	6183	G	A	G	G	G	G	G	G	G	G	G	G	G	G	G	G	G	G	G	G	G	G	G	G	G	G	G	G	G	G	G	G	G	G	G	G	G	G	G	G	G	G	G	G	G	G	G	G
MT-6210-A-G-no-rs	6210	A	G	A	A	A	A	A	A	A	A	A	A	A	A	A	A	A	A	A	A	A	A	A	A	A	A	A	A	A	A	A	A	A	A	A	A	A	A	A	A	A	A	A	A	A	A	A	A
MT-6225-G-A-no-rs	6225	G	A	G	G	G	G	G	G	G	G	G	G	G	G	G	G	G	G	G	G	G	G	G	G	G	G	G	G	G	G	G	G	G	G	G	G	G	G	G	G	G	G	G	G	G	G	G	G
MT-6255-C-T-no-rs	6255	C	T	C	C	C	C	C	C	C	C	C	C	C	C	C	C	C	C	C	C	C	C	C	C	C	C	C	C	C	C	C	C	C	C	C	C	C	C	C	C	C	C	C	C	C	C	C	C
MT-6258-T-C-no-rs	6258	T	C	T	T	T	T	T	T	T	T	T	T	T	T	T	T	T	T	T	T	T	T	T	T	T	T	T	T	T	T	T	T	T	T	T	T	T	T	T	T	T	T	T	T	T	T	T	T
MT-6261-C-T-no-rs	6261	C	T	C	C	C	C	C	C	C	C	C	C	C	C	C	C	C	C	C	C	C	C	C	C	C	C	C	C	C	C	C	C	C	C	C	C	C	C	C	C	C	C	C	C	C	C	C	C
MT-6273-C-T-no-rs	6273	C	T	C	C	C	C	C	C	C	C	C	C	C	C	C	C	C	C	C	C	C	C	C	C	C	C	C	C	C	C	C	C	C	C	C	C	C	C	C	C	C	C	C	C	C	C	C	C
MT-6300-T-C-no-rs	6300	T	C	T	T	T	T	T	T	T	T	T	T	T	T	T	T	T	T	T	T	T	T	T	T	T	T	T	T	T	T	T	T	T	T	T	T	T	T	T	T	T	T	T	T	T	T	T	T
MT-6306-T-A-no-rs	6306	T	A	T	T	T	T	T	T	T	T	T	T	T	T	T	T	T	T	T	T	T	T	T	T	T	T	T	T	T	T	T	T	T	T	T	T	T	T	T	T	T	T	T	T	T	T	T	T
MT-6324-C-T-no-rs	6324	C	T	C	C	C	C	C	C	C	C	C	C	C	C	C	C	C	C	C	C	C	C	C	C	C	C	C	C	C	C	C	C	C	C	C	C	C	C	C	C	C	C	C	C	C	C	C	C
MT-6336-C-T-no-rs	6336	C	T	C	C	C	C	C	C	C	C	C	C	C	C	C	C	C	C	C	C	C	C	C	C	C	C	C	C	C	C	C	C	C	C	C	C	C	C	C	C	C	C	C	C	C	C	C	C
MT-6345-C-T-no-rs	6345	C	T	C	C	C	C	C	C	C	C	C	C	C	C	C	C	C	C	C	C	C	C	C	C	C	C	C	C	C	C	C	C	C	C	C	C	C	C	C	C	C	C	C	C	C	C	C	C
MT-6390-C-T-no-rs	6390	C	T	C	C	C	C	C	C	C	C	C	C	C	C	C	C	C	C	C	C	C	C	C	C	C	C	C	C	C	C	C	C	C	C	C	C	C	C	C	C	C	C	C	C	C	C	C	C
MT-6414-A-G-no-rs	6414	A	G	A	A	A	A	A	A	A	A	A	A	A	A	A	A	A	A	A	A	A	A	A	A	A	A	A	A	A	A	A	A	A	A	A	A	A	A	A	A	A	A	A	A	A	A	A	A
MT-6417-T-C-no-rs	6417	T	C	T	T	T	T	T	T	T	T	T	T	T	T	T	T	T	T	T	T	T	T	T	T	T	T	T	T	T	T	T	T	T	T	T	T	T	T	T	T	T	T	T	T	T	T	T	T
MT-6418-C-T-no-rs	6418	C	T	C	C	C	C	C	C	C	C	C	C	C	C	C	C	C	C	C	C	C	C	C	C	C	C	C	C	C	C	C	C	C	C	C	C	C	C	C	C	C	C	C	C	C	C	C	C
MT-6433-C-T-no-rs	6433	C	T	C	C	C	C	C	C	C	C	C	C	C	C	C	C	C	C	C	C	C	C	C	C	C	C	C	C	C	C	C	C	C	C	C	C	C	C	C	C	C	C	C	C	C	C	C	C
MT-6435-A-G-no-rs	6435	A	G	A	A	A	A	A	A	A	A	A	A	A	A	A	A	A	A	A	A	A	A	A	A	A	A	A	A	A	A	A	A	A	A	A	A	A	A	A	A	A	A	A	A	A	A	A	A
MT-6459-T-C-no-rs	6459	T	C	T	T	T	T	T	T	T	T	T	T	T	T	T	T	T	T	T	T	T	T	T	T	T	T	T	T	T	T	T	T	T	T	T	T	T	T	T	T	T	T	T	T	T	T	T	T
MT-6465-C-T-no-rs	6465	C	T	C	C	C	C	C	C	C	C	C	C	C	C	C	C	C	C	C	C	C	C	C	C	C	C	C	C	C	C	C	C	C	C	C	C	C	C	C	C	C	C	C	C	C	C	C	C
MT-6474-T-C-no-rs	6474	T	C	T	T	T	T	T	T	T	T	T	T	T	T	T	T	T	T	T	T	T	T	T	T	T	T	T	T	T	T	T	T	T	T	T	T	T	T	T	T	T	T	T	T	T	T	T	T
MT-6495-T-C-no-rs	6495	T	C	T	T	T	T	T	T	T	T	T	T	T	T	T	T	T	T	T	T	T	T	T	T	T	T	T	T	T	T	T	T	T	T	T	T	T	T	T	T	T	T	T	T	T	T	T	T
MT-6498-T-C-no-rs	6498	T	C	T	T	T	T	T	T	T	T	T	T	T	T	T	T	T	T	T	T	T	T	T	T	T	T	T	T	T	T	T	T	T	T	T	T	T	T	T	T	T	T	T	T	T	T	T	T
MT-6507-T-C-no-rs	6507	T	C	T	T	T	T	T	T	T	T	T	T	T	T	T	T	T	T	T	T	T	T	T	T	T	T	T	T	T	T	T	T	T	T	T	T	T	T	T	T	T	T	T	T	T	T	T	T
MT-6531-G-A-no-rs	6531	G	A	G	G	A	G	A	A	A	A	G	G	G	G	G	G	G	A	G	A	G	G	G	G	G	A	G	A	A	A	G	G	A	G	G	A	G	A	G	A	G	G	G	G	G	G	A	A
MT-6534-G-A-no-rs	6534	G	A	G	G	G	G	G	G	G	G	G	G	G	G	G	G	G	G	G	G	G	G	G	G	G	G	G	G	G	G	G	G	G	G	G	G	G	G	G	G	G	G	G	G	G	G	G	G
MT-6543-A-T-no-rs	6543	A	T	A	A	A	A	A	A	A	A	A	A	A	A	A	A	A	A	A	A	A	A	A	A	A	A	A	A	A	A	A	A	A	A	A	A	A	A	A	A	A	A	A	A	A	A	A	A
MT-6567-A-G-no-rs	6567	A	G	A	A	A	A	A	A	A	A	A	A	A	A	A	A	A	A	A	A	A	A	A	A	A	A	A	A	A	A	A	A	A	A	A	A	A	A	A	A	A	A	A	A	A	A	A	A
MT-6570-C-T-no-rs	6570	C	T	C	C	C	C	C	C	C	C	C	C	C	C	C	C	C	C	C	C	C	C	C	C	C	C	C	C	C	C	C	C	C	C	C	C	C	C	C	C	C	C	C	C	C	C	C	C
MT-6579-C-T-no-rs	6579	C	T	C	C	C	C	C	C	C	C	C	C	C	C	C	C	C	C	C	C	C	C	C	C	C	C	C	C	C	C	C	C	C	C	C	C	C	C	C	C	C	C	C	C	C	C	C	C
MT-6600-C-T-no-rs	6600	C	T	C	C	C	C	C	C	C	C	C	C	C	C	C	C	C	C	C	C	C	C	C	C	C	C	C	C	C	C	C	C	C	C	C	C	C	C	C	C	C	C	C	C	C	C	C	C
MT-6624-A-C-no-rs	6624	A	C	A	A	A	A	A	A	A	A	A	A	A	A	A	A	A	A	A	A	A	A	A	A	A	A	A	A	A	A	A	A	A	A	A	A	A	A	A	A	A	A	A	A	A	A	A	A
MT-6633-C-T-no-rs	6633	C	T	C	C	C	C	C	C	C	C	C	C	C	C	C	C	C	C	C	C	C	C	C	C	C	C	C	C	C	C	C	C	C	C	C	C	C	C	C	C	C	C	C	C	C	C	C	C
MT-6648-T-C-no-rs	6648	T	C	T	T	T	T	T	T	T	T	T	T	T	T	T	T	T	T	T	T	T	T	T	T	T	T	T	T	T	T	T	T	T	T	T	T	T	T	T	T	T	T	T	T	T	T	T	T
MT-6669-G-A-no-rs	6669	G	A	G	G	G	G	G	G	G	G	G	G	G	G	G	G	G	G	G	G	G	G	G	G	G	G	G	G	G	G	G	G	G	G	G	G	G	G	G	G	G	G	G	G	G	G	G	G
MT-6687-T-C-no-rs	6687	T	C	T	T	T	T	T	T	T	T	T	T	T	T	T	T	T	T	T	T	T	T	T	T	T	T	T	T	T	T	T	T	T	T	T	T	T	T	T	T	T	T	T	T	T	T	T	T
MT-6690-T-C-no-rs	6690	T	C	T	C	T	C	T	T	T	T	C	C	C	C	C	C	C	T	C	T	C	C	C	T	C	T	C	T	T	T	C	C	T	C	C	T	C	T	C	T	C	C	C	C	C	C	T	T
MT-6693-A-G-no-rs	6693	A	G	A	A	A	A	A	A	A	A	A	A	A	A	A	A	A	A	A	A	A	A	A	A	A	A	A	A	A	A	A	A	A	A	A	A	A	A	A	A	A	A	A	A	A	A	A	A
MT-6699-A-G-no-rs	6699	A	G	A	A	A	A	A	A	A	A	A	A	A	A	A	A	A	A	A	A	A	A	A	A	A	A	A	A	A	A	A	A	A	A	A	A	A	A	A	A	A	A	A	A	A	A	A	A
MT-6726-C-T-no-rs	6726	C	T	C	C	C	C	C	C	C	C	C	C	C	C	C	C	C	C	C	C	C	C	C	C	C	C	C	C	C	C	C	C	C	C	C	C	C	C	C	C	C	C	C	C	C	C	C	C
MT-6738-T-C-no-rs	6738	T	C	T	T	T	T	T	T	T	T	T	T	T	T	T	T	T	T	T	T	T	T	T	T	T	T	T	T	T	T	T	T	T	T	T	T	T	T	T	T	T	T	T	T	T	T	T	T
MT-6747-T-C-no-rs	6747	T	C	T	T	T	T	T	T	T	T	T	T	T	T	T	T	T	T	T	T	T	T	T	T	T	T	T	T	T	T	T	T	T	T	T	T	T	T	T	T	T	T	T	T	T	T	T	T
MT-6756-G-A-no-rs	6756	G	A	G	G	G	G	G	G	G	G	G	G	G	G	G	G	G	G	G	G	G	G	G	G	G	G	G	G	G	G	G	G	G	G	G	G	G	G	G	G	G	G	G	G	G	G	G	G
MT-6757-A-G-no-rs	6757	A	G	A	A	A	A	A	A	A	A	A	A	A	A	A	A	A	A	A	A	A	A	A	A	A	A	A	A	A	A	A	A	A	A	A	A	A	A	A	A	A	A	A	A	A	A	A	A
MT-6768-T-C-no-rs	6768	T	C	T	T	T	T	T	T	T	T	T	T	T	T	T	T	T	T	T	T	T	T	T	T	T	T	T	T	T	T	T	T	T	T	T	T	T	T	T	T	T	T	T	T	T	T	T	T
MT-6777-T-C-no-rs	6777	T	C	T	T	T	T	T	T	T	T	T	T	T	T	T	T	T	T	T	T	T	T	T	T	T	T	T	T	T	T	T	T	T	T	T	T	T	T	T	T	T	T	T	T	T	T	T	T
MT-6786-G-A-rs394359191	6786	G	A	A	A	A	A	A	A	A	A	A	A	A	A	A	A	A	A	A	A	A	A	A	A	A	A	A	A	A	A	A	A	A	A	A	A	A	A	A	A	A	A	A	A	A	A	A	A
MT-6822-A-G-no-rs	6822	A	G	A	A	A	A	A	A	A	A	A	A	A	A	A	A	A	A	A	A	A	A	A	A	A	A	A	A	A	A	A	A	A	A	A	A	A	A	A	A	A	A	A	A	A	A	A	A
MT-6834-T-C-no-rs	6834	T	C	T	T	T	T	T	T	T	T	T	T	T	T	T	T	T	T	T	T	T	T	T	T	T	T	T	T	T	T	T	T	T	T	T	T	T	T	T	T	T	T	T	T	T	T	T	T
MT-6837-G-A-no-rs	6837	G	A	G	G	G	G	G	G	G	G	G	G	G	G	G	G	G	G	G	G	G	G	G	G	G	G	G	G	G	G	G	G	G	G	G	G	G	G	G	G	G	G	G	G	G	G	G	G
MT-6849-C-T-no-rs	6849	C	T	C	C	C	C	C	C	C	C	C	C	C	C	C	C	C	C	C	C	C	C	C	C	C	C	C	C	C	C	C	C	C	C	C	C	C	C	C	C	C	C	C	C	C	C	C	C
MT-6870-C-T-no-rs	6870	C	T	C	C	C	C	C	C	C	C	C	C	C	C	C	C	C	C	C	C	C	C	C	C	C	C	C	C	C	C	C	C	C	C	C	C	C	C	C	C	C	C	C	C	C	C	C	C
MT-6879-A-G-no-rs	6879	A	G	A	A	A	A	A	A	A	A	A	A	A	A	A	A	A	A	A	A	A	A	A	A	A	A	A	A	A	A	A	A	A	A	A	A	A	A	A	A	A	A	A	A	A	A	A	A
MT-6886-A-G-no-rs	6886	A	G	A	A	A	A	A	A	A	A	A	A	A	A	A	A	A	A	A	A	A	A	A	A	A	A	A	A	A	A	A	A	A	A	A	A	A	A	A	A	A	A	A	A	A	A	A	A
MT-6932-A-G-no-rs	6932	A	G	A	A	A	A	A	A	A	A	A	A	A	A	A	A	A	A	A	A	A	A	A	A	A	A	A	A	A	A	A	A	A	A	A	A	A	A	A	A	A	A	A	A	A	A	A	A
MT-6949-T-C-no-rs	6949	T	C	T	T	T	T	T	T	T	T	T	T	T	T	T	T	T	T	T	T	T	T	T	T	T	T	T	T	T	T	T	T	T	T	T	T	T	T	T	T	T	T	T	T	T	T	T	T
MT-6959-A-G-no-rs	6959	A	G	A	A	A	A	A	A	A	A	A	A	A	A	A	A	A	A	A	A	A	A	A	A	A	A	A	A	A	A	A	A	A	A	A	A	A	A	A	A	A	A	A	A	A	A	A	A
MT-6975-T-C-no-rs	6975	T	C	T	T	T	T	T	T	T	T	T	T	T	T	T	T	T	T	T	T	T	T	T	T	T	T	T	T	T	T	T	T	T	T	T	T	T	T	T	T	T	T	T	T	T	T	T	T
MT-6976-C-T-no-rs	6976	C	T	C	C	C	C	C	C	C	C	C	C	C	C	C	C	C	C	C	C	C	C	C	C	C	C	C	C	C	C	C	C	C	C	C	C	C	C	C	C	C	C	C	C	C	C	C	C
MT-6979-T-A-no-rs	6979	T	A	T	T	T	T	T	T	T	T	T	T	T	T	T	T	T	T	T	T	T	T	T	T	T	T	T	T	T	T	T	T	T	T	T	T	T	T	T	T	T	T	T	T	T	T	T	T
MT-6980-T-C-no-rs	6980	T	C	T	T	T	T	T	T	T	T	T	T	T	T	T	T	T	T	T	T	T	T	T	T	T	T	T	T	T	T	T	T	T	T	T	T	T	T	T	T	T	T	T	T	T	T	T	T
MT-7003-G-A-rs395764943	7003	G	A	G	A	A	A	A	A	A	A	A	A	A	A	A	A	A	A	A	A	A	A	A	G	A	A	A	A	A	A	A	A	A	A	A	A	A	A	A	A	A	A	A	A	A	A	A	A
MT-7033-C-T-no-rs	7033	C	T	C	C	C	C	C	C	C	C	C	C	C	C	C	C	C	C	C	C	C	C	C	C	C	C	C	C	C	C	C	C	C	C	C	C	C	C	C	C	C	C	C	C	C	C	C	C
MT-7059-C-T-no-rs	7059	C	T	C	C	C	C	C	C	C	C	C	C	C	C	C	C	C	C	C	C	C	C	C	C	C	C	C	C	C	C	C	C	C	C	C	C	C	C	C	C	C	C	C	C	C	C	C	C
MT-7066-C-T-no-rs	7066	C	T	C	C	C	C	C	C	C	C	C	C	C	C	C	C	C	C	C	C	C	C	C	C	C	C	C	C	C	C	C	C	C	C	C	C	C	C	C	C	C	C	C	C	C	C	C	C
MT-7113-C-T-no-rs	7113	C	T	C	C	C	C	C	C	C	C	C	C	C	C	C	C	C	C	C	C	C	C	C	C	C	C	C	C	C	C	C	C	C	C	C	C	C	C	C	C	C	C	C	C	C	C	C	C
MT-7119-C-T-no-rs	7119	C	T	C	C	C	C	C	C	C	C	C	C	C	C	C	C	C	C	C	C	C	C	C	C	C	C	C	C	C	C	C	C	C	C	C	C	C	C	C	C	C	C	C	C	C	C	C	C
MT-7125-C-T-no-rs	7125	C	T	C	C	C	C	C	C	C	C	C	C	C	C	C	C	C	C	C	C	C	C	C	C	C	C	C	C	C	C	C	C	C	C	C	C	C	C	C	C	C	C	C	C	C	C	C	C
MT-7128-A-G-no-rs	7128	A	G	A	A	A	A	A	A	A	A	A	A	A	A	A	A	A	A	A	A	A	A	A	A	A	A	A	A	A	A	A	A	A	A	A	A	A	A	A	A	A	A	A	A	A	A	A	A
MT-7144-C-T-no-rs	7144	C	T	C	C	C	C	C	C	C	C	C	C	C	C	C	C	C	C	C	C	C	C	C	C	C	C	C	C	C	C	C	C	C	C	C	C	C	C	C	C	C	C	C	C	C	C	C	C
MT-7161-A-G-no-rs	7161	A	G	A	A	A	A	A	A	A	A	A	A	A	A	A	A	A	A	A	A	A	A	A	A	A	A	A	A	A	A	A	A	A	A	A	A	A	A	A	A	A	A	A	A	A	A	A	A
MT-7167-T-C-no-rs	7167	T	C	T	T	T	T	T	T	T	T	T	T	T	T	T	T	T	T	T	T	T	T	T	T	T	T	T	T	T	T	T	T	T	T	T	T	T	T	T	T	T	T	T	T	T	T	T	T
MT-7173-C-T-no-rs	7173	C	T	C	C	C	C	C	C	C	C	C	C	C	C	C	C	C	C	C	C	C	C	C	C	C	C	C	C	C	C	C	C	C	C	C	C	C	C	C	C	C	C	C	C	C	C	C	C
MT-7188-A-G-no-rs	7188	A	G	A	A	A	A	A	A	A	A	A	A	A	A	A	A	A	A	A	A	A	A	A	A	A	A	A	A	A	A	A	A	A	A	A	A	A	A	A	A	A	A	A	A	A	A	A	A
MT-7191-T-C-no-rs	7191	T	C	T	T	T	T	T	T	T	T	T	T	T	T	T	T	T	T	T	T	T	T	T	T	T	T	T	T	T	T	T	T	T	T	T	T	T	T	T	T	T	T	T	T	T	T	T	T
MT-7203-T-C-no-rs	7203	T	C	T	T	T	T	T	T	T	T	T	T	T	T	T	T	T	T	T	T	T	T	T	T	T	T	T	T	T	T	T	T	T	T	T	T	T	T	T	T	T	T	T	T	T	T	T	T
MT-7204-A-T-no-rs	7204	A	T	A	A	A	A	A	A	A	A	A	A	A	A	A	A	A	A	A	A	A	A	A	A	A	A	A	A	A	A	A	A	A	A	A	A	A	A	A	A	A	A	A	A	A	A	A	A
MT-7218-T-C-no-rs	7218	T	C	T	T	T	T	T	T	T	T	T	T	T	T	T	T	T	T	T	T	T	T	T	T	T	T	T	T	T	T	T	T	T	T	T	T	T	T	T	T	T	T	T	T	T	T	T	T
MT-7221-T-C-no-rs	7221	T	C	T	T	T	T	T	T	T	T	T	T	T	T	T	T	T	T	T	T	T	T	T	T	T	T	T	T	T	T	T	T	T	T	T	T	T	T	T	T	T	T	T	T	T	T	T	T
MT-7233-G-A-no-rs	7233	G	A	G	G	G	G	G	G	G	G	G	G	G	G	G	G	G	G	G	G	G	G	G	G	G	G	G	G	G	G	G	G	G	G	G	G	G	G	G	G	G	G	G	G	G	G	G	G
MT-7245-G-A-no-rs	7245	G	A	G	G	A	G	A	A	A	A	G	G	G	G	G	G	G	A	G	A	G	G	G	G	G	A	G	A	A	A	G	G	A	G	G	A	G	A	G	A	G	G	G	G	G	G	A	A
MT-7260-C-T-no-rs	7260	C	T	C	C	C	C	C	C	C	C	C	C	C	C	C	C	C	C	C	C	C	C	C	C	C	C	C	C	C	C	C	C	C	C	C	C	C	C	C	C	C	C	C	C	C	C	C	C
MT-7275-C-T-no-rs	7275	C	T	C	C	C	C	C	C	C	C	C	C	C	C	C	C	C	C	C	C	C	C	C	C	C	C	C	C	C	C	C	C	C	C	C	C	C	C	C	C	C	C	C	C	C	C	C	C
MT-7290-A-G-no-rs	7290	A	G	A	A	A	A	A	A	A	A	A	A	A	A	A	A	A	A	A	A	A	A	A	A	A	A	A	A	A	A	A	A	A	A	A	A	A	A	A	A	A	A	A	A	A	A	A	A
MT-7311-T-C-no-rs	7311	T	C	T	T	T	T	T	T	T	T	T	T	T	T	T	T	T	T	T	T	T	T	T	T	T	T	T	T	T	T	T	T	T	T	T	T	T	T	T	T	T	T	T	T	T	T	T	T
MT-7314-A-G-no-rs	7314	A	G	A	A	A	A	A	A	A	A	A	A	A	A	A	A	A	A	A	A	A	A	A	A	A	A	A	A	A	A	A	A	A	A	A	A	A	A	A	A	A	A	A	A	A	A	A	A
MT-7317-C-T-no-rs	7317	C	T	C	C	C	C	C	C	C	C	C	C	C	C	C	C	C	C	C	C	C	C	C	C	C	C	C	C	C	C	C	C	C	C	C	C	C	C	C	C	C	C	C	C	C	C	C	C
MT-7320-T-C-no-rs	7320	T	C	T	T	T	T	T	T	T	T	T	T	T	T	T	T	T	T	T	T	T	T	T	T	T	T	T	T	T	T	T	T	T	T	T	T	T	T	T	T	T	T	T	T	T	T	T	T
MT-7323-T-C-no-rs	7323	T	C	T	T	T	T	T	T	T	T	T	T	T	T	T	T	T	T	T	T	T	T	T	T	T	T	T	T	T	T	T	T	T	T	T	T	T	T	T	T	T	T	T	T	T	T	T	T
MT-7326-G-A-no-rs	7326	G	A	G	G	G	G	G	G	G	G	G	G	G	G	G	G	G	G	G	G	G	G	G	G	G	G	G	G	G	G	G	G	G	G	G	G	G	G	G	G	G	G	G	G	G	G	G	G
MT-7329-C-T-no-rs	7329	C	T	C	C	C	C	C	C	C	C	C	C	C	C	C	C	C	C	C	C	C	C	C	C	C	C	C	C	C	C	C	C	C	C	C	C	C	C	C	C	C	C	C	C	C	C	C	C
MT-7368-C-T-no-rs	7368	C	T	C	C	C	C	C	C	C	C	C	C	C	C	C	C	C	C	C	C	C	C	C	C	C	C	C	C	C	C	C	C	C	C	C	C	C	C	C	C	C	C	C	C	C	C	C	C
MT-7383-T-C-no-rs	7383	T	C	T	T	T	T	T	T	T	T	T	T	T	T	T	T	T	T	T	T	T	T	T	T	T	T	T	T	T	T	T	T	T	T	T	T	T	T	T	T	T	T	T	T	T	T	T	T
MT-7393-T-C-no-rs	7393	T	C	T	T	T	T	T	T	T	T	T	T	T	T	T	T	T	T	T	T	T	T	T	T	T	T	T	T	T	T	T	T	T	T	T	T	T	T	T	T	T	T	T	T	T	T	T	T
MT-7401-T-C-no-rs	7401	T	C	T	T	T	T	T	T	T	T	T	T	T	T	T	T	T	T	T	T	T	T	T	T	T	T	T	T	T	T	T	T	T	T	T	T	T	T	T	T	T	T	T	T	T	T	T	T
MT-7429-C-T-no-rs	7429	C	T	C	C	T	C	T	T	T	T	C	C	C	C	C	C	C	T	C	T	C	C	C	C	C	T	C	T	T	T	C	C	T	C	C	T	C	T	C	T	C	C	C	C	C	C	T	T
MT-7431-A-G-no-rs	7431	A	G	A	A	A	A	A	A	A	A	A	A	A	A	A	A	A	A	A	A	A	A	A	A	A	A	A	A	A	A	A	A	A	A	A	A	A	A	A	A	A	A	A	A	A	A	A	A
MT-7434-A-G-no-rs	7434	A	G	A	A	A	A	A	A	A	A	A	A	A	A	A	A	A	A	A	A	A	A	A	A	A	A	A	A	A	A	A	A	A	A	A	A	A	A	A	A	A	A	A	A	A	A	A	A
MT-7444-T-C-no-rs	7444	T	C	T	T	T	T	T	T	T	T	T	T	T	T	T	T	T	T	T	T	T	T	T	T	T	T	T	T	T	T	T	T	T	T	T	T	T	T	T	T	T	T	T	T	T	T	T	T
MT-7449-T-C-no-rs	7449	T	C	T	T	T	T	T	T	T	T	T	T	T	T	T	T	T	T	T	T	T	T	T	T	T	T	T	T	T	T	T	T	T	T	T	T	T	T	T	T	T	T	T	T	T	T	T	T
MT-7467-T-C-no-rs	7467	T	C	T	T	T	T	T	T	T	T	T	T	T	T	T	T	T	T	T	T	T	T	T	T	T	T	T	T	T	T	T	T	T	T	T	T	T	T	T	T	T	T	T	T	T	T	T	T
MT-7479-C-T-no-rs	7479	C	T	C	C	C	C	C	C	C	C	C	C	C	C	C	C	C	C	C	C	C	C	C	C	C	C	C	C	C	C	C	C	C	C	C	C	C	C	C	C	C	C	C	C	C	C	C	C
MT-7482-C-T-no-rs	7482	C	T	C	C	C	C	C	C	C	C	C	C	C	C	C	C	C	C	C	C	C	C	C	C	C	C	C	C	C	C	C	C	C	C	C	C	C	C	C	C	C	C	C	C	C	C	C	C
MT-7494-C-T-no-rs	7494	C	T	C	C	C	C	C	C	C	C	C	C	C	C	C	C	C	C	C	C	C	C	C	C	C	C	C	C	C	C	C	C	C	C	C	C	C	C	C	C	C	C	C	C	C	C	C	C
MT-7500-A-G-no-rs	7500	A	G	A	A	A	A	A	A	A	A	A	A	A	A	A	A	A	A	A	A	A	A	A	A	A	A	A	A	A	A	A	A	A	A	A	A	A	A	A	A	A	A	A	A	A	A	A	A
MT-7503-G-A-no-rs	7503	G	A	G	G	G	G	G	G	G	G	G	G	G	G	G	G	G	G	G	G	G	G	G	G	G	G	G	G	G	G	G	G	G	G	G	G	G	G	G	G	G	G	G	G	G	G	G	G
MT-7504-C-T-no-rs	7504	C	T	C	C	C	C	C	C	C	C	C	C	C	C	C	C	C	C	C	C	C	C	C	C	C	C	C	C	C	C	C	C	C	C	C	C	C	C	C	C	C	C	C	C	C	C	C	C
MT-7506-A-G-no-rs	7506	A	G	A	A	A	A	A	A	A	A	A	A	A	A	A	A	A	A	A	A	A	A	A	A	A	A	A	A	A	A	A	A	A	A	A	A	A	A	A	A	A	A	A	A	A	A	A	A
MT-7524-C-A-no-rs	7524	C	A	C	C	C	C	C	C	C	C	C	C	C	C	C	C	C	C	C	C	C	C	C	C	C	C	C	C	C	C	C	C	C	C	C	C	C	C	C	C	C	C	C	C	C	C	C	C
MT-7525-C-T-no-rs	7525	C	T	C	C	C	C	C	C	C	C	C	C	C	C	C	C	C	C	C	C	C	C	C	C	C	C	C	C	C	C	C	C	C	C	C	C	C	C	C	C	C	C	C	C	C	C	C	C
MT-7542-G-C-no-rs	7542	G	C	G	G	G	G	G	G	G	G	G	G	G	G	G	G	G	G	G	G	G	G	G	G	G	G	G	G	G	G	G	G	G	G	G	G	G	G	G	G	G	G	G	G	G	G	G	G
MT-7563-A-G-no-rs	7563	A	G	A	A	A	A	A	A	A	A	A	A	A	A	A	A	A	A	A	A	A	A	A	A	A	A	A	A	A	A	A	A	A	A	A	A	A	A	A	A	A	A	A	A	A	A	A	A
MT-7569-T-C-no-rs	7569	T	C	T	T	T	T	T	T	T	T	T	T	T	T	T	T	T	T	T	T	T	T	T	T	T	T	T	T	T	T	T	T	T	T	T	T	T	T	T	T	T	T	T	T	T	T	T	T
MT-7578-G-A-no-rs	7578	G	A	G	G	G	G	G	G	G	G	G	G	G	G	G	G	G	G	G	G	G	G	G	G	G	G	G	G	G	G	G	G	G	G	G	G	G	G	G	G	G	G	G	G	G	G	G	G
MT-7590-G-A-no-rs	7590	G	A	G	G	G	G	G	G	G	G	G	G	G	G	G	G	G	G	G	G	G	G	G	G	G	G	G	G	G	G	G	G	G	G	G	G	G	G	G	G	G	G	G	G	G	G	G	G
MT-7602-G-A-no-rs	7602	G	A	G	G	G	G	G	G	G	G	G	G	G	G	G	G	G	G	G	G	G	G	G	G	G	G	G	G	G	G	G	G	G	G	G	G	G	G	G	G	G	G	G	G	G	G	G	G
MT-7608-T-C-no-rs	7608	T	C	T	T	T	T	T	T	T	T	T	T	T	T	T	T	T	T	T	T	T	T	T	T	T	T	T	T	T	T	T	T	T	T	T	T	T	T	T	T	T	T	T	T	T	T	T	T
MT-7614-A-T-no-rs	7614	A	T	A	A	T	A	T	T	T	T	A	A	A	A	A	A	A	T	A	T	A	A	A	A	A	T	A	T	T	T	A	A	T	A	A	T	A	T	A	T	A	A	A	A	A	A	T	T
MT-7617-A-C-no-rs	7617	A	C	A	A	A	A	A	A	A	A	A	A	A	A	A	A	A	A	A	A	A	A	A	A	A	A	A	A	A	A	A	A	A	A	A	A	A	A	A	A	A	A	A	A	A	A	A	A
MT-7626-C-T-no-rs	7626	C	T	C	C	C	C	C	C	C	C	C	C	C	C	C	C	C	C	C	C	C	C	C	C	C	C	C	C	C	C	C	C	C	C	C	C	C	C	C	C	C	C	C	C	C	C	C	C
MT-7629-T-C-rs869311957	7629	T	C	T	T	T	T	T	T	T	T	T	T	T	T	T	T	T	T	T	T	T	T	T	C	T	T	T	T	T	T	T	T	T	T	T	T	T	T	T	T	T	T	T	T	T	T	T	T
MT-7644-C-T-no-rs	7644	C	T	C	C	C	C	C	C	C	C	C	C	C	C	C	C	C	C	C	C	C	C	C	C	C	C	C	C	C	C	C	C	C	C	C	C	C	C	C	C	C	C	C	C	C	C	C	C
MT-7668-A-G-rs394200691	7668	A	G	A	A	G	A	G	G	G	G	A	A	A	A	A	A	A	G	A	G	A	A	A	A	A	G	A	G	G	G	A	A	G	A	A	G	A	G	A	G	A	A	A	A	A	A	G	G
MT-7677-C-T-no-rs	7677	C	T	C	C	C	C	C	C	C	C	C	C	C	C	C	C	C	C	C	C	C	C	C	C	C	C	C	C	C	C	C	C	C	C	C	C	C	C	C	C	C	C	C	C	C	C	C	C
MT-7699-C-T-no-rs	7699	C	T	C	C	C	C	C	C	C	C	C	C	C	C	C	C	C	C	C	C	C	C	C	C	C	C	C	C	C	C	C	C	C	C	C	C	C	C	C	C	C	C	C	C	C	C	C	C
MT-7726-T-C-no-rs	7726	T	C	T	T	T	T	T	T	T	T	T	T	T	T	T	T	T	T	T	T	T	T	T	T	T	T	T	T	T	T	T	T	T	T	T	T	T	T	T	T	T	T	T	T	T	T	T	T
MT-7733-G-A-no-rs	7733	G	A	G	G	G	G	G	G	G	G	G	G	G	G	G	G	G	G	G	G	G	G	G	G	G	G	G	G	G	G	G	G	G	G	G	G	G	G	G	G	G	G	G	G	G	G	G	G
MT-7751-T-C-no-rs	7751	T	C	T	T	T	T	T	T	T	T	T	T	T	T	T	T	T	T	T	T	T	T	T	T	T	T	T	T	T	T	T	T	T	T	T	T	T	T	T	T	T	T	T	T	T	T	T	T
MT-7755-A-G-no-rs	7755	A	G	A	A	A	A	A	A	A	A	A	A	A	A	A	A	A	A	A	A	A	A	A	A	A	A	A	A	A	A	A	A	A	A	A	A	A	A	A	A	A	A	A	A	A	A	A	A
MT-7776-T-C-no-rs	7776	T	C	T	T	T	T	T	T	T	T	T	T	T	T	T	T	T	T	T	T	T	T	T	T	T	T	T	T	T	T	T	T	T	T	T	T	T	T	T	T	T	T	T	T	T	T	T	T
MT-7789-C-T-no-rs	7789	C	T	C	C	C	C	C	C	C	C	C	C	C	C	C	C	C	C	C	C	C	C	C	C	C	C	C	C	C	C	C	C	C	C	C	C	C	C	C	C	C	C	C	C	C	C	C	C
MT-7813-T-C-no-rs	7813	T	C	T	T	T	T	T	T	T	T	T	T	T	T	T	T	T	T	T	T	T	T	T	T	T	T	T	T	T	T	T	T	T	T	T	T	T	T	T	T	T	T	T	T	T	T	T	T
MT-7831-T-C-no-rs	7831	T	C	T	T	T	T	T	T	T	T	T	T	T	T	T	T	T	T	T	T	T	T	T	T	T	T	T	T	T	T	T	T	T	T	T	T	T	T	T	T	T	T	T	T	T	T	T	T
MT-7835-T-C-no-rs	7835	T	C	T	T	T	T	T	T	T	T	T	T	T	T	T	T	T	T	T	T	T	T	T	T	T	T	T	T	T	T	T	T	T	T	T	T	T	T	T	T	T	T	T	T	T	T	T	T
MT-7875-T-C-no-rs	7875	T	C	T	T	T	T	T	T	T	T	T	T	T	T	T	T	T	T	T	T	T	T	T	T	T	T	T	T	T	T	T	T	T	T	T	T	T	T	T	T	T	T	T	T	T	T	T	T
MT-7887-C-T-no-rs	7887	C	T	C	C	C	C	C	C	C	C	C	C	C	C	C	C	C	C	C	C	C	C	C	C	C	C	C	C	C	C	C	C	C	C	C	C	C	C	C	C	C	C	C	C	C	C	C	C
MT-7905-G-A-no-rs	7905	G	A	G	G	G	G	G	G	G	G	G	G	G	G	G	G	G	G	G	G	G	G	G	G	G	G	G	G	G	G	G	G	G	G	G	G	G	G	G	G	G	G	G	G	G	G	G	G
MT-7936-A-G-no-rs	7936	A	G	A	A	A	A	A	A	A	A	A	A	A	A	A	A	A	A	A	A	A	A	A	A	A	A	A	A	A	A	A	A	A	A	A	A	A	A	A	A	A	A	A	A	A	A	A	A
MT-7938-A-T-no-rs	7938	A	T	A	A	A	A	A	A	A	A	A	A	A	A	A	A	A	A	A	A	A	A	A	A	A	A	A	A	A	A	A	A	A	A	A	A	A	A	A	A	A	A	A	A	A	A	A	A
MT-7943-A-G-no-rs	7943	A	G	A	A	A	A	A	A	A	A	A	A	A	A	A	A	A	A	A	A	A	A	A	A	A	A	A	A	A	A	A	A	A	A	A	A	A	A	A	A	A	A	A	A	A	A	A	A
MT-7944-C-T-no-rs	7944	C	T	C	C	C	C	C	C	C	C	C	C	C	C	C	C	C	C	C	C	C	C	C	C	C	C	C	C	C	C	C	C	C	C	C	C	C	C	C	C	C	C	C	C	C	C	C	C
MT-7945-T-C-no-rs	7945	T	C	T	T	T	T	T	T	T	T	T	T	T	T	T	T	T	T	T	T	T	T	T	T	T	T	T	T	T	T	T	T	T	T	T	T	T	T	T	T	T	T	T	T	T	T	T	T
MT-7946-C-T-no-rs	7946	C	T	C	C	C	C	C	C	C	C	C	C	C	C	C	C	C	C	C	C	C	C	C	C	C	C	C	C	C	C	C	C	C	C	C	C	C	C	C	C	C	C	C	C	C	C	C	C
MT-7947-T-C-no-rs	7947	T	C	T	T	T	T	T	T	T	T	T	T	T	T	T	T	T	T	T	T	T	T	T	T	T	T	T	T	T	T	T	T	T	T	T	T	T	T	T	T	T	T	T	T	T	T	T	T
MT-7948-G-A-no-rs	7948	G	A	G	G	G	G	G	G	G	G	G	G	G	G	G	G	G	G	G	G	G	G	G	G	G	G	G	G	G	G	G	G	G	G	G	G	G	G	G	G	G	G	G	G	G	G	G	G
MT-7953-T-C-no-rs	7953	T	C	T	T	T	T	T	T	T	T	T	T	T	T	T	T	T	T	T	T	T	T	T	T	T	T	T	T	T	T	T	T	T	T	T	T	T	T	T	T	T	T	T	T	T	T	T	T
MT-7983-G-A-no-rs	7983	G	A	G	G	G	G	G	G	G	G	G	G	G	G	G	G	G	G	G	G	G	G	G	G	G	G	G	G	G	G	G	G	G	G	G	G	G	G	G	G	G	G	G	G	G	G	G	G
MT-7986-T-C-no-rs	7986	T	C	T	T	T	T	T	T	T	T	T	T	T	T	T	T	T	T	T	T	T	T	T	T	T	T	T	T	T	T	T	T	T	T	T	T	T	T	T	T	T	T	T	T	T	T	T	T
MT-8007-G-A-rs397358799	8007	G	A	G	A	A	A	A	A	A	A	A	A	A	A	A	A	A	A	A	A	A	A	A	G	A	A	A	A	A	A	A	A	A	A	A	A	A	A	A	A	A	A	A	A	A	A	A	A
MT-8015-C-T-no-rs	8015	C	T	C	C	C	C	C	C	C	C	C	C	C	C	C	C	C	C	C	C	C	C	C	C	C	C	C	C	C	C	C	C	C	C	C	C	C	C	C	C	C	C	C	C	C	C	C	C
MT-8027-T-C-no-rs	8027	T	C	T	T	T	T	T	T	T	T	T	T	T	T	T	T	T	T	T	T	T	T	T	T	T	T	T	T	T	T	T	T	T	T	T	T	T	T	T	T	T	T	T	T	T	T	T	T
MT-8030-G-A-no-rs	8030	G	A	G	G	G	G	G	G	G	G	G	G	G	G	G	G	G	G	G	G	G	G	G	G	G	G	G	G	G	G	G	G	G	G	G	G	G	G	G	G	G	G	G	G	G	G	G	G
MT-8036-C-T-no-rs	8036	C	T	C	C	C	C	C	C	C	C	C	C	C	C	C	C	C	C	C	C	C	C	C	C	C	C	C	C	C	C	C	C	C	C	C	C	C	C	C	C	C	C	C	C	C	C	C	C
MT-8039-A-G-no-rs	8039	A	G	A	G	A	G	A	A	A	A	G	G	G	G	G	G	G	A	G	A	G	G	G	A	G	A	G	A	A	A	G	G	A	G	G	A	G	A	G	A	G	G	G	G	G	G	A	A
MT-8045-C-T-no-rs	8045	C	T	C	C	C	C	C	C	C	C	C	C	C	C	C	C	C	C	C	C	C	C	C	C	C	C	C	C	C	C	C	C	C	C	C	C	C	C	C	C	C	C	C	C	C	C	C	C
MT-8099-T-C-no-rs	8099	T	C	T	T	T	T	T	T	T	T	T	T	T	T	T	T	T	T	T	T	T	T	T	T	T	T	T	T	T	T	T	T	T	T	T	T	T	T	T	T	T	T	T	T	T	T	T	T
MT-8108-G-A-no-rs	8108	G	A	G	G	G	G	G	G	G	G	G	G	G	G	G	G	G	G	G	G	G	G	G	G	G	G	G	G	G	G	G	G	G	G	G	G	G	G	G	G	G	G	G	G	G	G	G	G
MT-8112-G-A-rs869311958	8112	G	A	G	G	G	G	G	G	G	G	G	G	G	G	G	G	G	G	G	G	G	G	G	G	G	G	G	G	G	G	G	G	G	G	G	G	G	G	G	G	G	G	G	G	G	G	G	G
MT-8139-G-A-no-rs	8139	G	A	G	G	G	G	G	G	G	G	G	G	G	G	G	G	G	G	G	G	G	G	G	G	G	G	G	G	G	G	G	G	G	G	G	G	G	G	G	G	G	G	G	G	G	G	G	G
MT-8142-A-G-no-rs	8142	A	G	A	A	A	A	A	A	A	A	A	A	A	A	A	A	A	A	A	A	A	A	A	A	A	A	A	A	A	A	A	A	A	A	A	A	A	A	A	A	A	A	A	A	A	A	A	A
MT-8152-G-A-no-rs	8152	G	A	G	G	A	G	A	A	A	A	G	G	G	G	G	G	G	A	G	A	G	G	G	G	G	A	G	A	A	A	G	G	A	G	G	A	G	A	G	A	G	G	G	G	G	G	A	A
MT-8171-T-C-no-rs	8171	T	C	T	T	T	T	T	T	T	T	T	T	T	T	T	T	T	T	T	T	T	T	T	T	T	T	T	T	T	T	T	T	T	T	T	T	T	T	T	T	T	T	T	T	T	T	T	T
MT-8174-T-C-no-rs	8174	T	C	T	T	T	T	T	T	T	T	T	T	T	T	T	T	T	T	T	T	T	T	T	T	T	T	T	T	T	T	T	T	T	T	T	T	T	T	T	T	T	T	T	T	T	T	T	T
MT-8177-A-G-no-rs	8177	A	G	A	A	A	A	A	A	A	A	A	A	A	A	A	A	A	A	A	A	A	A	A	A	A	A	A	A	A	A	A	A	A	A	A	A	A	A	A	A	A	A	A	A	A	A	A	A
MT-8186-A-G-no-rs	8186	A	G	A	A	A	A	A	A	A	A	A	A	A	A	A	A	A	A	A	A	A	A	A	A	A	A	A	A	A	A	A	A	A	A	A	A	A	A	A	A	A	A	A	A	A	A	A	A
MT-8189-G-A-no-rs	8189	G	A	G	G	G	G	G	G	G	G	G	G	G	G	G	G	G	G	G	G	G	G	G	G	G	G	G	G	G	G	G	G	G	G	G	G	G	G	G	G	G	G	G	G	G	G	G	G
MT-8201-T-C-no-rs	8201	T	C	T	T	T	T	T	T	T	T	T	T	T	T	T	T	T	T	T	T	T	T	T	T	T	T	T	T	T	T	T	T	T	T	T	T	T	T	T	T	T	T	T	T	T	T	T	T
MT-8204-C-T-no-rs	8204	C	T	C	C	C	C	C	C	C	C	C	C	C	C	C	C	C	C	C	C	C	C	C	C	C	C	C	C	C	C	C	C	C	C	C	C	C	C	C	C	C	C	C	C	C	C	C	C
MT-8219-A-G-no-rs	8219	A	G	A	A	A	A	A	A	A	A	A	A	A	A	A	A	A	A	A	A	A	A	A	A	A	A	A	A	A	A	A	A	A	A	A	A	A	A	A	A	A	A	A	A	A	A	A	A
MT-8225-A-T-no-rs	8225	A	T	A	A	A	A	A	A	A	A	A	A	A	A	A	A	A	A	A	A	A	A	A	A	A	A	A	A	A	A	A	A	A	A	A	A	A	A	A	A	A	A	A	A	A	A	A	A
MT-8231-T-C-no-rs	8231	T	C	T	T	T	T	T	T	T	T	T	T	T	T	T	T	T	T	T	T	T	T	T	T	T	T	T	T	T	T	T	T	T	T	T	T	T	T	T	T	T	T	T	T	T	T	T	T
MT-8240-T-C-no-rs	8240	T	C	T	T	C	T	C	C	C	C	T	T	T	T	T	T	T	C	T	C	T	T	T	T	T	C	T	C	C	C	T	T	C	T	T	C	T	C	T	C	T	T	T	T	T	T	C	C
MT-8279-T-C-no-rs	8279	T	C	T	T	T	T	T	T	T	T	T	T	T	T	T	T	T	T	T	T	T	T	T	T	T	T	T	T	T	T	T	T	T	T	T	T	T	T	T	T	T	T	T	T	T	T	T	T
MT-8282-T-C-no-rs	8282	T	C	T	T	T	T	T	T	T	T	T	T	T	T	T	T	T	T	T	T	T	T	T	T	T	T	T	T	T	T	T	T	T	T	T	T	T	T	T	T	T	T	T	T	T	T	T	T
MT-8297-G-A-no-rs	8297	G	A	G	G	G	G	G	G	G	G	G	G	G	G	G	G	G	G	G	G	G	G	G	G	G	G	G	G	G	G	G	G	G	G	G	G	G	G	G	G	G	G	G	G	G	G	G	G
MT-8303-A-G-rs395594658	8303	A	G	A	A	A	A	A	A	A	A	A	A	A	A	A	A	A	A	A	A	A	A	A	A	A	A	A	A	A	A	A	A	A	A	A	A	A	A	A	A	A	A	A	A	A	A	A	A
MT-8309-A-G-no-rs	8309	A	G	A	A	A	A	A	A	A	A	A	A	A	A	A	A	A	A	A	A	A	A	A	A	A	A	A	A	A	A	A	A	A	A	A	A	A	A	A	A	A	A	A	A	A	A	A	A
MT-8321-C-T-rs397051745	8321	C	T	C	C	C	C	C	C	C	C	C	C	C	C	C	C	C	C	C	C	C	C	C	C	C	C	C	C	C	C	C	C	C	C	C	C	C	C	C	C	C	C	C	C	C	C	C	C
MT-8354-T-C-no-rs	8354	T	C	T	T	T	T	T	T	T	T	T	T	T	T	T	T	T	T	T	T	T	T	T	T	T	T	T	T	T	T	T	T	T	T	T	T	T	T	T	T	T	T	T	T	T	T	T	T
MT-8363-G-A-no-rs	8363	G	A	G	G	A	G	A	A	A	A	G	G	G	G	G	G	G	A	G	A	G	G	G	G	G	A	G	A	A	A	G	G	A	G	G	A	G	A	G	A	G	G	G	G	G	G	A	A
MT-8366-C-T-no-rs	8366	C	T	C	C	C	C	C	C	C	C	C	C	C	C	C	C	C	C	C	C	C	C	C	C	C	C	C	C	C	C	C	C	C	C	C	C	C	C	C	C	C	C	C	C	C	C	C	C
MT-8381-C-T-rs869311959	8381	C	T	C	C	C	C	C	C	C	C	C	C	C	C	C	C	C	C	C	C	C	C	C	C	C	C	C	C	C	C	C	C	C	C	C	C	C	C	C	C	C	C	C	C	C	C	C	C
MT-8384-A-G-no-rs	8384	A	G	A	A	A	A	A	A	A	A	A	A	A	A	A	A	A	A	A	A	A	A	A	A	A	A	A	A	A	A	A	A	A	A	A	A	A	A	A	A	A	A	A	A	A	A	A	A
MT-8391-A-G-no-rs	8391	A	G	A	A	A	A	A	A	A	A	A	A	A	A	A	A	A	A	A	A	A	A	A	A	A	A	A	A	A	A	A	A	A	A	A	A	A	A	A	A	A	A	A	A	A	A	A	A
MT-8399-G-A-no-rs	8399	G	A	G	G	G	G	G	G	G	G	G	G	G	G	G	G	G	G	G	G	G	G	G	G	G	G	G	G	G	G	G	G	G	G	G	G	G	G	G	G	G	G	G	G	G	G	G	G
MT-8407-G-A-no-rs	8407	G	A	G	G	G	G	G	G	G	G	G	G	G	G	G	G	G	G	G	G	G	G	G	G	G	G	G	G	G	G	G	G	G	G	G	G	G	G	G	G	G	G	G	G	G	G	G	G
MT-8424-G-A-no-rs	8424	G	A	G	G	G	G	G	G	G	G	G	G	G	G	G	G	G	G	G	G	G	G	G	G	G	G	G	G	G	G	G	G	G	G	G	G	G	G	G	G	G	G	G	G	G	G	G	G
MT-8429-C-T-no-rs	8429	C	T	C	C	C	C	C	C	C	C	C	C	C	C	C	C	C	C	C	C	C	C	C	C	C	C	C	C	C	C	C	C	C	C	C	C	C	C	C	C	C	C	C	C	C	C	C	C
MT-8438-G-A-no-rs	8438	G	A	G	G	G	G	G	G	G	G	G	G	G	G	G	G	G	G	G	G	G	G	G	G	G	G	G	G	G	G	G	G	G	G	G	G	G	G	G	G	G	G	G	G	G	G	G	G
MT-8447-C-T-no-rs	8447	C	T	C	C	C	C	C	C	C	C	C	C	C	C	C	C	C	C	C	C	C	C	C	C	C	C	C	C	C	C	C	C	C	C	C	C	C	C	C	C	C	C	C	C	C	C	C	C
MT-8448-G-T-no-rs	8448	G	T	G	G	G	G	G	G	G	G	G	G	G	G	G	G	G	G	G	G	G	G	G	G	G	G	G	G	G	G	G	G	G	G	G	G	G	G	G	G	G	G	G	G	G	G	G	G
MT-8468-C-T-no-rs	8468	C	T	C	C	C	C	C	C	C	C	C	C	C	C	C	C	C	C	C	C	C	C	C	C	C	C	C	C	C	C	C	C	C	C	C	C	C	C	C	C	C	C	C	C	C	C	C	C
MT-8471-C-T-no-rs	8471	C	T	C	C	C	C	C	C	C	C	C	C	C	C	C	C	C	C	C	C	C	C	C	C	C	C	C	C	C	C	C	C	C	C	C	C	C	C	C	C	C	C	C	C	C	C	C	C
MT-8477-A-C-no-rs	8477	A	C	A	A	A	A	A	A	A	A	A	A	A	A	A	A	A	A	A	A	A	A	A	A	A	A	A	A	A	A	A	A	A	A	A	A	A	A	A	A	A	A	A	A	A	A	A	A
MT-8492-G-A-no-rs	8492	G	A	G	G	G	G	G	G	G	G	G	G	G	G	G	G	G	G	G	G	G	G	G	G	G	G	G	G	G	G	G	G	G	G	G	G	G	G	G	G	G	G	G	G	G	G	G	G
MT-8498-A-G-no-rs	8498	A	G	A	A	A	A	A	A	A	A	A	A	A	A	A	A	A	A	A	A	A	A	A	A	A	A	A	A	A	A	A	A	A	A	A	A	A	A	A	A	A	A	A	A	A	A	A	A
MT-8516-C-T-no-rs	8516	C	T	C	C	C	C	C	C	C	C	C	C	C	C	C	C	C	C	C	C	C	C	C	C	C	C	C	C	C	C	C	C	C	C	C	C	C	C	C	C	C	C	C	C	C	C	C	C
MT-8540-G-A-no-rs	8540	G	A	G	G	G	G	G	G	G	G	G	G	G	G	G	G	G	G	G	G	G	G	G	G	G	G	G	G	G	G	G	G	G	G	G	G	G	G	G	G	G	G	G	G	G	G	G	G
MT-8543-T-C-no-rs	8543	T	C	T	T	T	T	T	T	T	T	T	T	T	T	T	T	T	T	T	T	T	T	T	T	T	T	T	T	T	T	T	T	T	T	T	T	T	T	T	T	T	T	T	T	T	T	T	T
MT-8546-C-T-no-rs	8546	C	T	C	C	C	C	C	C	C	C	C	C	C	C	C	C	C	C	C	C	C	C	C	C	C	C	C	C	C	C	C	C	C	C	C	C	C	C	C	C	C	C	C	C	C	C	C	C
MT-8552-A-G-no-rs	8552	A	G	A	A	A	A	A	A	A	A	A	A	A	A	A	A	A	A	A	A	A	A	A	A	A	A	A	A	A	A	A	A	A	A	A	A	A	A	A	A	A	A	A	A	A	A	A	A
MT-8615-G-A-no-rs	8615	G	A	G	G	G	G	G	G	G	G	G	G	G	G	G	G	G	G	G	G	G	G	G	G	G	G	G	G	G	G	G	G	G	G	G	G	G	G	G	G	G	G	G	G	G	G	G	G
MT-8621-C-T-no-rs	8621	C	T	C	C	C	C	C	C	C	C	C	C	C	C	C	C	C	C	C	C	C	C	C	C	C	C	C	C	C	C	C	C	C	C	C	C	C	C	C	C	C	C	C	C	C	C	C	C
MT-8624-T-C-no-rs	8624	T	C	T	T	T	T	T	T	T	T	T	T	T	T	T	T	T	T	T	T	T	T	T	T	T	T	T	T	T	T	T	T	T	T	T	T	T	T	T	T	T	T	T	T	T	T	T	T
MT-8628-T-C-no-rs	8628	T	C	T	T	T	T	T	T	T	T	T	T	T	T	T	T	T	T	T	T	T	T	T	T	T	T	T	T	T	T	T	T	T	T	T	T	T	T	T	T	T	T	T	T	T	T	T	T
MT-8636-C-T-no-rs	8636	C	T	C	C	C	C	C	C	C	C	C	C	C	C	C	C	C	C	C	C	C	C	C	C	C	C	C	C	C	C	C	C	C	C	C	C	C	C	C	C	C	C	C	C	C	C	C	C
MT-8665-T-C-no-rs	8665	T	C	T	T	T	T	T	T	T	T	T	T	T	T	T	T	T	T	T	T	T	T	T	T	T	T	T	T	T	T	T	T	T	T	T	T	T	T	T	T	T	T	T	T	T	T	T	T
MT-8735-C-T-no-rs	8735	C	T	C	C	C	C	C	C	C	C	C	C	C	C	C	C	C	C	C	C	C	C	C	C	C	C	C	C	C	C	C	C	C	C	C	C	C	C	C	C	C	C	C	C	C	C	C	C
MT-8749-T-C-no-rs	8749	T	C	T	T	T	T	T	T	T	T	T	T	T	T	T	T	T	T	T	T	T	T	T	T	T	T	T	T	T	T	T	T	T	T	T	T	T	T	T	T	T	T	T	T	T	T	T	T
MT-8758-C-T-no-rs	8758	C	T	C	C	C	C	C	C	C	C	C	C	C	C	C	C	C	C	C	C	C	C	C	C	C	C	C	C	C	C	C	C	C	C	C	C	C	C	C	C	C	C	C	C	C	C	C	C
MT-8765-T-C-no-rs	8765	T	C	T	T	T	T	T	T	T	T	T	T	T	T	T	T	T	T	T	T	T	T	T	T	T	T	T	T	T	T	T	T	T	T	T	T	T	T	T	T	T	T	T	T	T	T	T	T
MT-8771-C-T-no-rs	8771	C	T	C	C	C	C	C	C	C	C	C	C	C	C	C	C	C	C	C	C	C	C	C	C	C	C	C	C	C	C	C	C	C	C	C	C	C	C	C	C	C	C	C	C	C	C	C	C
MT-8777-A-C-no-rs	8777	A	C	A	A	A	A	A	A	A	A	A	A	A	A	A	A	A	A	A	A	A	A	A	A	A	A	A	A	A	A	A	A	A	A	A	A	A	A	A	A	A	A	A	A	A	A	A	A
MT-8779-A-G-no-rs	8779	A	G	A	A	A	A	A	A	A	A	A	A	A	A	A	A	A	A	A	A	A	A	A	A	A	A	A	A	A	A	A	A	A	A	A	A	A	A	A	A	A	A	A	A	A	A	A	A
MT-8782-G-A-no-rs	8782	G	A	G	G	G	G	G	G	G	G	G	G	G	G	G	G	G	G	G	G	G	G	G	G	G	G	G	G	G	G	G	G	G	G	G	G	G	G	G	G	G	G	G	G	G	G	G	G
MT-8794-C-T-no-rs	8794	C	T	C	C	C	C	C	C	C	C	C	C	C	C	C	C	C	C	C	C	C	C	C	C	C	C	C	C	C	C	C	C	C	C	C	C	C	C	C	C	C	C	C	C	C	C	C	C
MT-8800-T-C-no-rs	8800	T	C	T	T	T	T	T	T	T	T	T	T	T	T	T	T	T	T	T	T	T	T	T	T	T	T	T	T	T	T	T	T	T	T	T	T	T	T	T	T	T	T	T	T	T	T	T	T
MT-8818-A-G-no-rs	8818	A	G	A	A	A	A	A	A	A	A	A	A	A	A	A	A	A	A	A	A	A	A	A	A	A	A	A	A	A	A	A	A	A	A	A	A	A	A	A	A	A	A	A	A	A	A	A	A
MT-8878-A-G-no-rs	8878	A	G	A	A	A	A	A	A	A	A	A	A	A	A	A	A	A	A	A	A	A	A	A	A	A	A	A	A	A	A	A	A	A	A	A	A	A	A	A	A	A	A	A	A	A	A	A	A
MT-8944-C-T-no-rs	8944	C	T	C	C	C	C	C	C	C	C	C	C	C	C	C	C	C	C	C	C	C	C	C	C	C	C	C	C	C	C	C	C	C	C	C	C	C	C	C	C	C	C	C	C	C	C	C	C
MT-8969-A-G-no-rs	8969	A	G	A	A	A	A	A	A	A	A	A	A	A	A	A	A	A	A	A	A	A	A	A	A	A	A	A	A	A	A	A	A	A	A	A	A	A	A	A	A	A	A	A	A	A	A	A	A
MT-9055-C-T-no-rs	9055	C	T	C	C	T	C	T	T	T	T	C	C	C	C	C	C	C	T	C	T	C	C	C	C	C	T	C	T	T	T	C	C	T	C	C	T	C	T	C	T	C	C	C	C	C	C	T	T
MT-9073-T-C-no-rs	9073	T	C	T	T	T	T	T	T	T	T	T	T	T	T	T	T	T	T	T	T	T	T	T	T	T	T	T	T	T	T	T	T	T	T	T	T	T	T	T	T	T	T	T	T	T	T	T	T
MT-9088-C-T-no-rs	9088	C	T	C	C	T	C	T	T	T	T	C	C	C	C	C	C	C	T	C	T	C	C	C	C	C	T	C	T	T	T	C	C	T	C	C	T	C	T	C	T	C	C	C	C	C	C	T	T
MT-9155-G-A-no-rs	9155	G	A	G	G	G	G	G	G	G	G	G	G	G	G	G	G	G	G	G	G	G	G	G	G	G	G	G	G	G	G	G	G	G	G	G	G	G	G	G	G	G	G	G	G	G	G	G	G
MT-9157-A-G-no-rs	9157	A	G	A	A	A	A	A	A	A	A	A	A	A	A	A	A	A	A	A	A	A	A	A	A	A	A	A	A	A	A	A	A	A	A	A	A	A	A	A	A	A	A	A	A	A	A	A	A
MT-9163-C-T-no-rs	9163	C	T	C	C	C	C	C	C	C	C	C	C	C	C	C	C	C	C	C	C	C	C	C	C	C	C	C	C	C	C	C	C	C	C	C	C	C	C	C	C	C	C	C	C	C	C	C	C
MT-9169-T-C-no-rs	9169	T	C	T	T	T	T	T	T	T	T	T	T	T	T	T	T	T	T	T	T	T	T	T	T	T	T	T	T	T	T	T	T	T	T	T	T	T	T	T	T	T	T	T	T	T	T	T	T
MT-9172-C-T-no-rs	9172	C	T	C	C	C	C	C	C	C	C	C	C	C	C	C	C	C	C	C	C	C	C	C	C	C	C	C	C	C	C	C	C	C	C	C	C	C	C	C	C	C	C	C	C	C	C	C	C
MT-9187-C-T-no-rs	9187	C	T	C	C	C	C	C	C	C	C	C	C	C	C	C	C	C	C	C	C	C	C	C	C	C	C	C	C	C	C	C	C	C	C	C	C	C	C	C	C	C	C	C	C	C	C	C	C
MT-9190-T-C-no-rs	9190	T	C	T	T	T	T	T	T	T	T	T	T	T	T	T	T	T	T	T	T	T	T	T	T	T	T	T	T	T	T	T	T	T	T	T	T	T	T	T	T	T	T	T	T	T	T	T	T
MT-9196-C-T-no-rs	9196	C	T	C	C	C	C	C	C	C	C	C	C	C	C	C	C	C	C	C	C	C	C	C	C	C	C	C	C	C	C	C	C	C	C	C	C	C	C	C	C	C	C	C	C	C	C	C	C
MT-9217-A-G-no-rs	9217	A	G	A	A	A	A	A	A	A	A	A	A	A	A	A	A	A	A	A	A	A	A	A	A	A	A	A	A	A	A	A	A	A	A	A	A	A	A	A	A	A	A	A	A	A	A	A	A
MT-9229-A-G-no-rs	9229	A	G	A	A	A	A	A	A	A	A	A	A	A	A	A	A	A	A	A	A	A	A	A	A	A	A	A	A	A	A	A	A	A	A	A	A	A	A	A	A	A	A	A	A	A	A	A	A
MT-9247-A-G-no-rs	9247	A	G	A	A	A	A	A	A	A	A	A	A	A	A	A	A	A	A	A	A	A	A	A	A	A	A	A	A	A	A	A	A	A	A	A	A	A	A	A	A	A	A	A	A	A	A	A	A
MT-9250-G-A-no-rs	9250	G	A	G	G	G	G	G	G	G	G	G	G	G	G	G	G	G	G	G	G	G	G	G	G	G	G	G	G	G	G	G	G	G	G	G	G	G	G	G	G	G	G	G	G	G	G	G	G
MT-9253-C-T-no-rs	9253	C	T	C	C	C	C	C	C	C	C	C	C	C	C	C	C	C	C	C	C	C	C	C	C	C	C	C	C	C	C	C	C	C	C	C	C	C	C	C	C	C	C	C	C	C	C	C	C
MT-9271-T-C-no-rs	9271	T	C	T	T	T	T	T	T	T	T	T	T	T	T	T	T	T	T	T	T	T	T	T	T	T	T	T	T	T	T	T	T	T	T	T	T	T	T	T	T	T	T	T	T	T	T	T	T
MT-9280-T-C-no-rs	9280	T	C	T	T	T	T	T	T	T	T	T	T	T	T	T	T	T	T	T	T	T	T	T	T	T	T	T	T	T	T	T	T	T	T	T	T	T	T	T	T	T	T	T	T	T	T	T	T
MT-9289-C-T-no-rs	9289	C	T	C	C	C	C	C	C	C	C	C	C	C	C	C	C	C	C	C	C	C	C	C	C	C	C	C	C	C	C	C	C	C	C	C	C	C	C	C	C	C	C	C	C	C	C	C	C
MT-9292-T-C-no-rs	9292	T	C	T	T	T	T	T	T	T	T	T	T	T	T	T	T	T	T	T	T	T	T	T	T	T	T	T	T	T	T	T	T	T	T	T	T	T	T	T	T	T	T	T	T	T	T	T	T
MT-9298-T-C-no-rs	9298	T	C	T	T	T	T	T	T	T	T	T	T	T	T	T	T	T	T	T	T	T	T	T	T	T	T	T	T	T	T	T	T	T	T	T	T	T	T	T	T	T	T	T	T	T	T	T	T
MT-9316-A-G-no-rs	9316	A	G	A	A	A	A	A	A	A	A	A	A	A	A	A	A	A	A	A	A	A	A	A	A	A	A	A	A	A	A	A	A	A	A	A	A	A	A	A	A	A	A	A	A	A	A	A	A
MT-9334-C-T-no-rs	9334	C	T	C	C	C	C	C	C	C	C	C	C	C	C	C	C	C	C	C	C	C	C	C	C	C	C	C	C	C	C	C	C	C	C	C	C	C	C	C	C	C	C	C	C	C	C	C	C
MT-9349-C-T-no-rs	9349	C	T	C	C	C	C	C	C	C	C	C	C	C	C	C	C	C	C	C	C	C	C	C	C	C	C	C	C	C	C	C	C	C	C	C	C	C	C	C	C	C	C	C	C	C	C	C	C
MT-9386-G-A-no-rs	9386	G	A	G	G	G	G	G	G	G	G	G	G	G	G	G	G	G	G	G	G	G	G	G	G	G	G	G	G	G	G	G	G	G	G	G	G	G	G	G	G	G	G	G	G	G	G	G	G
MT-9513-A-G-no-rs	9513	A	G	A	A	A	A	A	A	A	A	A	A	A	A	A	A	A	A	A	A	A	A	A	A	A	A	A	A	A	A	A	A	A	A	A	A	A	A	A	A	A	A	A	A	A	A	A	A
MT-9542-G-A-rs869311965	9542	G	A	G	G	G	G	G	G	G	G	G	G	G	G	G	G	G	G	G	G	G	G	G	G	G	G	G	G	G	G	G	G	G	G	G	G	G	G	G	G	G	G	G	G	G	G	G	G
MT-9567-C-T-no-rs	9567	C	T	C	C	C	C	C	C	C	C	C	C	C	C	C	C	C	C	C	C	C	C	C	C	C	C	C	C	C	C	C	C	C	C	C	C	C	C	C	C	C	C	C	C	C	C	C	C
MT-9608-T-C-no-rs	9608	T	C	T	T	T	T	T	T	T	T	T	T	T	T	T	T	T	T	T	T	T	T	T	T	T	T	T	T	T	T	T	T	T	T	T	T	T	T	T	T	T	T	T	T	T	T	T	T
MT-9626-T-A-no-rs	9626	T	A	T	T	T	T	T	T	T	T	T	T	T	T	T	T	T	T	T	T	T	T	T	T	T	T	T	T	T	T	T	T	T	T	T	T	T	T	T	T	T	T	T	T	T	T	T	T
MT-9628-T-C-no-rs	9628	T	C	T	T	T	T	T	T	T	T	T	T	T	T	T	T	T	T	T	T	T	T	T	T	T	T	T	T	T	T	T	T	T	T	T	T	T	T	T	T	T	T	T	T	T	T	T	T
MT-9630-G-A-no-rs	9630	G	A	G	G	G	G	G	G	G	G	G	G	G	G	G	G	G	G	G	G	G	G	G	G	G	G	G	G	G	G	G	G	G	G	G	G	G	G	G	G	G	G	G	G	G	G	G	G
MT-9632-G-C-no-rs	9632	G	C	G	G	G	G	G	G	G	G	G	G	G	G	G	G	G	G	G	G	G	G	G	G	G	G	G	G	G	G	G	G	G	G	G	G	G	G	G	G	G	G	G	G	G	G	G	G
MT-9633-T-C-no-rs	9633	T	C	T	T	T	T	T	T	T	T	T	T	T	T	T	T	T	T	T	T	T	T	T	T	T	T	T	T	T	T	T	T	T	T	T	T	T	T	T	T	T	T	T	T	T	T	T	T
MT-9635-A-T-no-rs	9635	A	T	A	A	A	A	A	A	A	A	A	A	A	A	A	A	A	A	A	A	A	A	A	A	A	A	A	A	A	A	A	A	A	A	A	A	A	A	A	A	A	A	A	A	A	A	A	A
MT-9641-C-T-no-rs	9641	C	T	C	C	C	C	C	C	C	C	C	C	C	C	C	C	C	C	C	C	C	C	C	C	C	C	C	C	C	C	C	C	C	C	C	C	C	C	C	C	C	C	C	C	C	C	C	C
MT-9644-C-A-no-rs	9644	C	A	C	C	C	C	C	C	C	C	C	C	C	C	C	C	C	C	C	C	C	C	C	C	C	C	C	C	C	C	C	C	C	C	C	C	C	C	C	C	C	C	C	C	C	C	C	C
MT-9666-T-C-no-rs	9666	T	C	T	T	T	T	T	T	T	T	T	T	T	T	T	T	T	T	T	T	T	T	T	T	T	T	T	T	T	T	T	T	T	T	T	T	T	T	T	T	T	T	T	T	T	T	T	T
MT-9671-G-A-no-rs	9671	G	A	N	A	G	A	G	G	G	G	A	A	A	A	A	A	A	G	A	G	A	A	A	G	A	G	A	G	G	G	A	A	G	A	A	N	A	G	A	G	A	A	A	A	A	A	G	G
MT-9675-A-G-no-rs	9675	A	G	A	A	A	A	A	A	A	A	A	A	A	A	A	A	A	A	A	A	A	A	A	A	A	A	A	A	A	A	A	A	A	A	A	A	A	A	A	A	A	A	A	A	A	A	A	A
MT-9683-T-C-no-rs	9683	T	C	T	T	T	T	T	T	T	T	T	T	T	T	T	T	T	T	T	T	T	T	T	T	T	T	T	T	T	T	T	T	T	T	T	T	T	T	T	T	T	T	T	T	T	T	T	T
MT-9686-G-A-rs396288335	9686	G	A	G	G	G	G	G	G	G	G	G	G	G	G	G	G	G	G	G	G	G	G	G	G	G	G	G	G	G	G	G	G	G	G	G	G	G	G	G	G	G	G	G	G	G	G	G	G
MT-9687-C-T-no-rs	9687	C	T	C	C	C	C	C	C	C	C	C	C	C	C	C	C	C	C	C	C	C	C	C	C	C	C	C	C	C	C	C	C	C	C	C	C	C	C	C	C	C	C	C	C	C	C	C	C
MT-9689-A-G-no-rs	9689	A	G	A	A	A	A	A	A	A	A	A	A	A	A	A	A	A	A	A	A	A	A	A	A	A	A	A	A	A	A	A	A	A	A	A	A	A	A	A	A	A	A	A	A	A	A	A	A
MT-9696-T-C-rs869311966	9696	T	C	T	T	T	T	T	T	T	T	T	T	T	T	T	T	T	T	T	T	T	T	T	T	T	T	T	T	T	T	T	T	T	T	T	T	T	T	T	T	T	T	T	T	T	T	T	T
MT-9704-T-C-no-rs	9704	T	C	T	T	T	T	T	T	T	T	T	T	T	T	T	T	T	T	T	T	T	T	T	T	T	T	T	T	T	T	T	T	T	T	T	T	T	T	T	T	T	T	T	T	T	T	T	T
MT-9705-G-A-no-rs	9705	G	A	G	G	G	G	G	G	G	G	G	G	G	G	G	G	G	G	G	G	G	G	G	G	G	G	G	G	G	G	G	G	G	G	G	G	G	G	G	G	G	G	G	G	G	G	G	G
MT-9716-A-G-no-rs	9716	A	G	A	A	A	A	A	A	A	A	A	A	A	A	A	A	A	A	A	A	A	A	A	A	A	A	A	A	A	A	A	A	A	A	A	A	A	A	A	A	A	A	A	A	A	A	A	A
MT-9719-C-T-no-rs	9719	C	T	C	C	C	C	C	C	C	C	C	C	C	C	C	C	C	C	C	C	C	C	C	C	C	C	C	C	C	C	C	C	C	C	C	C	C	C	C	C	C	C	C	C	C	C	C	C
MT-9722-T-C-no-rs	9722	T	C	T	T	T	T	T	T	T	T	T	T	T	T	T	T	T	T	T	T	T	T	T	T	T	T	T	T	T	T	T	T	T	T	T	T	T	T	T	T	T	T	T	T	T	T	T	T
MT-9737-A-G-no-rs	9737	A	G	A	A	A	A	A	A	A	A	A	A	A	A	A	A	A	A	A	A	A	A	A	A	A	A	A	A	A	A	A	A	A	A	A	A	A	A	A	A	A	A	A	A	A	A	A	A
MT-9743-T-A-no-rs	9743	T	A	N	A	T	A	T	T	T	T	A	A	A	A	A	A	A	T	A	T	A	A	A	T	A	T	A	T	T	T	A	A	T	A	A	N	A	T	A	T	A	A	A	A	A	A	T	T
MT-9749-A-G-no-rs	9749	A	G	A	A	A	A	A	A	A	A	A	A	A	A	A	A	A	A	A	A	A	A	A	A	A	A	A	A	A	A	A	A	A	A	A	A	A	A	A	A	A	A	A	A	A	A	A	A
MT-9764-C-T-no-rs	9764	C	T	C	C	C	C	C	C	C	C	C	C	C	C	C	C	C	C	C	C	C	C	C	C	C	C	C	C	C	C	C	C	C	C	C	C	C	C	C	C	C	C	C	C	C	C	C	C
MT-9777-C-T-no-rs	9777	C	T	C	C	T	C	T	T	T	T	C	C	C	C	C	C	C	T	C	T	C	C	C	C	C	T	C	T	T	T	C	C	T	C	C	T	C	T	C	T	C	C	C	C	C	C	T	T
MT-9788-T-C-no-rs	9788	T	C	T	T	T	T	T	T	T	T	T	T	T	T	T	T	T	T	T	T	T	T	T	T	T	T	T	T	T	T	T	T	T	T	T	T	T	T	T	T	T	T	T	T	T	T	T	T
MT-9794-C-T-no-rs	9794	C	T	C	C	C	C	C	C	C	C	C	C	C	C	C	C	C	C	C	C	C	C	C	C	C	C	C	C	C	C	C	C	C	C	C	C	C	C	C	C	C	C	C	C	C	C	C	C
MT-9803-A-G-no-rs	9803	A	G	A	A	A	A	A	A	A	A	A	A	A	A	A	A	A	A	A	A	A	A	A	A	A	A	A	A	A	A	A	A	A	A	A	A	A	A	A	A	A	A	A	A	A	A	A	A
MT-9806-C-T-no-rs	9806	C	T	C	C	C	C	C	C	C	C	C	C	C	C	C	C	C	C	C	C	C	C	C	C	C	C	C	C	C	C	C	C	C	C	C	C	C	C	C	C	C	C	C	C	C	C	C	C
MT-9827-A-G-no-rs	9827	A	G	A	A	A	A	A	A	A	A	A	A	A	A	A	A	A	A	A	A	A	A	A	A	A	A	A	A	A	A	A	A	A	A	A	A	A	A	A	A	A	A	A	A	A	A	A	A
MT-9858-A-G-no-rs	9858	A	G	A	A	A	A	A	A	A	A	A	A	A	A	A	A	A	A	A	A	A	A	A	A	A	A	A	A	A	A	A	A	A	A	A	A	A	A	A	A	A	A	A	A	A	A	A	A
MT-9929-T-C-no-rs	9929	T	C	T	T	T	T	T	T	T	T	T	T	T	T	T	T	T	T	T	T	T	T	T	T	T	T	T	T	T	T	T	T	T	T	T	T	T	T	T	T	T	T	T	T	T	T	T	T
MT-9950-C-T-rs869311967	9950	C	T	C	C	C	C	C	C	C	C	C	C	C	C	C	C	C	C	C	C	C	C	C	C	C	C	C	C	C	C	C	C	C	C	C	C	C	C	C	C	C	C	C	C	C	C	C	C
MT-9956-A-T-no-rs	9956	A	T	A	A	A	A	A	A	A	A	A	A	A	A	A	A	A	A	A	A	A	A	A	A	A	A	A	A	A	A	A	A	A	A	A	A	A	A	A	A	A	A	A	A	A	A	A	A
MT-9963-G-A-rs869311968	9963	G	A	G	G	G	G	G	G	G	G	G	G	G	G	G	G	G	G	G	G	G	G	G	A	G	G	G	G	G	G	G	G	G	G	G	G	G	G	G	G	G	G	G	G	G	G	G	G
MT-10001-A-G-no-rs	10001	A	G	A	A	A	A	A	A	A	A	A	A	A	A	A	A	A	A	A	A	A	A	A	A	A	A	A	A	A	A	A	A	A	A	A	A	A	A	A	A	A	A	A	A	A	A	A	A
MT-10049-C-T-no-rs	10049	C	T	C	C	C	C	C	C	C	C	C	C	C	C	C	C	C	C	C	C	C	C	C	C	C	C	C	C	C	C	C	C	C	C	C	C	C	C	C	C	C	C	C	C	C	C	C	C
MT-10064-C-T-no-rs	10064	C	T	C	C	C	C	C	C	C	C	C	C	C	C	C	C	C	C	C	C	C	C	C	C	C	C	C	C	C	C	C	C	C	C	C	C	C	C	C	C	C	C	C	C	C	C	C	C
MT-10067-C-T-no-rs	10067	C	T	C	C	C	C	C	C	C	C	C	C	C	C	C	C	C	C	C	C	C	C	C	C	C	C	C	C	C	C	C	C	C	C	C	C	C	C	C	C	C	C	C	C	C	C	C	C
MT-10070-C-T-no-rs	10070	C	T	C	C	C	C	C	C	C	C	C	C	C	C	C	C	C	C	C	C	C	C	C	C	C	C	C	C	C	C	C	C	C	C	C	C	C	C	C	C	C	C	C	C	C	C	C	C
MT-10082-T-C-no-rs	10082	T	C	T	T	T	T	T	T	T	T	T	T	T	T	T	T	T	T	T	T	T	T	T	T	T	T	T	T	T	T	T	T	T	T	T	T	T	T	T	T	T	T	T	T	T	T	T	T
MT-10094-T-C-no-rs	10094	T	C	T	T	T	T	T	T	T	T	T	T	T	T	T	T	T	T	T	T	T	T	T	T	T	T	T	T	T	T	T	T	T	T	T	T	T	T	T	T	T	T	T	T	T	T	T	T
MT-10097-C-T-no-rs	10097	C	T	C	C	C	C	C	C	C	C	C	C	C	C	C	C	C	C	C	C	C	C	C	C	C	C	C	C	C	C	C	C	C	C	C	C	C	C	C	C	C	C	C	C	C	C	C	C
MT-10100-C-T-no-rs	10100	C	T	C	C	C	C	C	C	C	C	C	C	C	C	C	C	C	C	C	C	C	C	C	C	C	C	C	C	C	C	C	C	C	C	C	C	C	C	C	C	C	C	C	C	C	C	C	C
MT-10112-T-C-rs394577163	10112	T	C	T	T	C	T	C	C	C	C	T	T	T	T	T	T	T	C	T	C	T	T	T	T	T	C	T	C	C	C	T	T	C	T	T	C	T	C	T	C	T	T	T	T	T	T	C	C
MT-10118-C-T-no-rs	10118	C	T	C	C	C	C	C	C	C	C	C	C	C	C	C	C	C	C	C	C	C	C	C	C	C	C	C	C	C	C	C	C	C	C	C	C	C	C	C	C	C	C	C	C	C	C	C	C
MT-10163-T-C-no-rs	10163	T	C	T	T	T	T	T	T	T	T	T	T	T	T	T	T	T	T	T	T	T	T	T	T	T	T	T	T	T	T	T	T	T	T	T	T	T	T	T	T	T	T	T	T	T	T	T	T
MT-10175-A-G-no-rs	10175	A	G	A	A	G	A	G	G	G	G	A	A	A	A	A	A	A	G	A	G	A	A	A	A	A	G	A	G	G	G	A	A	G	A	A	G	A	G	A	G	A	A	A	A	A	A	G	G
MT-10179-C-T-no-rs	10179	C	T	C	C	C	C	C	C	C	C	C	C	C	C	C	C	C	C	C	C	C	C	C	C	C	C	C	C	C	C	C	C	C	C	C	C	C	C	C	C	C	C	C	C	C	C	C	C
MT-10193-T-C-no-rs	10193	T	C	T	T	T	T	T	T	T	T	T	T	T	T	T	T	T	T	T	T	T	T	T	T	T	T	T	T	T	T	T	T	T	T	T	T	T	T	T	T	T	T	T	T	T	T	T	T
MT-10216-T-C-rs395800648	10216	T	C	T	C	C	C	C	C	C	C	C	C	C	C	C	C	C	C	C	C	C	C	C	T	C	C	C	C	C	C	C	C	C	C	C	C	C	C	C	C	C	C	C	C	C	C	C	C
MT-10222-T-C-no-rs	10222	T	C	T	T	T	T	T	T	T	T	T	T	T	T	T	T	T	T	T	T	T	T	T	T	T	T	T	T	T	T	T	T	T	T	T	T	T	T	T	T	T	T	T	T	T	T	T	T
MT-10225-C-T-no-rs	10225	C	T	C	C	C	C	C	C	C	C	C	C	C	C	C	C	C	C	C	C	C	C	C	C	C	C	C	C	C	C	C	C	C	C	C	C	C	C	C	C	C	C	C	C	C	C	C	C
MT-10240-G-A-rs869311970	10240	G	A	G	G	G	G	G	G	G	G	G	G	G	G	G	G	G	G	G	G	G	G	G	G	G	G	G	G	G	G	G	G	G	G	G	G	G	G	G	G	G	G	G	G	G	G	G	G
MT-10246-T-C-no-rs	10246	T	C	T	T	T	T	T	T	T	T	T	T	T	T	T	T	T	T	T	T	T	T	T	T	T	T	T	T	T	T	T	T	T	T	T	T	T	T	T	T	T	T	T	T	T	T	T	T
MT-10267-T-C-no-rs	10267	T	C	T	T	T	T	T	T	T	T	T	T	T	T	T	T	T	T	T	T	T	T	T	T	T	T	T	T	T	T	T	T	T	T	T	T	T	T	T	T	T	T	T	T	T	T	T	T
MT-10279-C-T-no-rs	10279	C	T	C	C	C	C	C	C	C	C	C	C	C	C	C	C	C	C	C	C	C	C	C	C	C	C	C	C	C	C	C	C	C	C	C	C	C	C	C	C	C	C	C	C	C	C	C	C
MT-10285-T-C-no-rs	10285	T	C	T	T	T	T	T	T	T	T	T	T	T	T	T	T	T	T	T	T	T	T	T	T	T	T	T	T	T	T	T	T	T	T	T	T	T	T	T	T	T	T	T	T	T	T	T	T
MT-10297-T-C-no-rs	10297	T	C	T	T	T	T	T	T	T	T	T	T	T	T	T	T	T	T	T	T	T	T	T	T	T	T	T	T	T	T	T	T	T	T	T	T	T	T	T	T	T	T	T	T	T	T	T	T
MT-10319-C-T-no-rs	10319	C	T	C	C	C	C	C	C	C	C	C	C	C	C	C	C	C	C	C	C	C	C	C	C	C	C	C	C	C	C	C	C	C	C	C	C	C	C	C	C	C	C	C	C	C	C	C	C
MT-10336-A-G-no-rs	10336	A	G	A	A	A	A	A	A	A	A	A	A	A	A	A	A	A	A	A	A	A	A	A	A	A	A	A	A	A	A	A	A	A	A	A	A	A	A	A	A	A	A	A	A	A	A	A	A
MT-10341-G-A-no-rs	10341	G	A	G	G	G	G	G	G	G	G	G	G	G	G	G	G	G	G	G	G	G	G	G	G	G	G	G	G	G	G	G	G	G	G	G	G	G	G	G	G	G	G	G	G	G	G	G	G
MT-10399-T-A-no-rs	10399	T	A	T	T	T	T	T	T	T	T	T	T	T	T	T	T	T	T	T	T	T	T	T	T	T	T	T	T	T	T	T	T	T	T	T	T	T	T	T	T	T	T	T	T	T	T	T	T
MT-10402-G-A-no-rs	10402	G	A	G	G	G	G	G	G	G	G	G	G	G	G	G	G	G	G	G	G	G	G	G	G	G	G	G	G	G	G	G	G	G	G	G	G	G	G	G	G	G	G	G	G	G	G	G	G
MT-10405-G-A-no-rs	10405	G	A	G	G	G	G	G	G	G	G	G	G	G	G	G	G	G	G	G	G	G	G	G	G	G	G	G	G	G	G	G	G	G	G	G	G	G	G	G	G	G	G	G	G	G	G	G	G
MT-10406-T-C-no-rs	10406	T	C	T	T	T	T	T	T	T	T	T	T	T	T	T	T	T	T	T	T	T	T	T	T	T	T	T	T	T	T	T	T	T	T	T	T	T	T	T	T	T	T	T	T	T	T	T	T
MT-10417-A-G-no-rs	10417	A	G	A	A	A	A	A	A	A	A	A	A	A	A	A	A	A	A	A	A	A	A	A	A	A	A	A	A	A	A	A	A	A	A	A	A	A	A	A	A	A	A	A	A	A	A	A	A
MT-10435-C-T-no-rs	10435	C	T	C	C	C	C	C	C	C	C	C	C	C	C	C	C	C	C	C	C	C	C	C	C	C	C	C	C	C	C	C	C	C	C	C	C	C	C	C	C	C	C	C	C	C	C	C	C
MT-10447-A-G-no-rs	10447	A	G	A	A	A	A	A	A	A	A	A	A	A	A	A	A	A	A	A	A	A	A	A	A	A	A	A	A	A	A	A	A	A	A	A	A	A	A	A	A	A	A	A	A	A	A	A	A
MT-10453-T-C-no-rs	10453	T	C	T	T	T	T	T	T	T	T	T	T	T	T	T	T	T	T	T	T	T	T	T	T	T	T	T	T	T	T	T	T	T	T	T	T	T	T	T	T	T	T	T	T	T	T	T	T
MT-10459-T-C-no-rs	10459	T	C	T	T	T	T	T	T	T	T	T	T	T	T	T	T	T	T	T	T	T	T	T	T	T	T	T	T	T	T	T	T	T	T	T	T	T	T	T	T	T	T	T	T	T	T	T	T
MT-10462-G-A-no-rs	10462	G	A	G	G	G	G	G	G	G	G	G	G	G	G	G	G	G	G	G	G	G	G	G	G	G	G	G	G	G	G	G	G	G	G	G	G	G	G	G	G	G	G	G	G	G	G	G	G
MT-10473-T-C-no-rs	10473	T	C	T	C	T	C	T	T	T	T	C	C	C	C	C	C	C	T	C	T	C	C	C	T	C	T	C	T	T	T	C	C	T	C	C	T	C	T	C	T	C	C	C	C	C	C	T	T
MT-10519-C-T-no-rs	10519	C	T	C	C	C	C	C	C	C	C	C	C	C	C	C	C	C	C	C	C	C	C	C	C	C	C	C	C	C	C	C	C	C	C	C	C	C	C	C	C	C	C	C	C	C	C	C	C
MT-10561-C-T-no-rs	10561	C	T	C	C	C	C	C	C	C	C	C	C	C	C	C	C	C	C	C	C	C	C	C	C	C	C	C	C	C	C	C	C	C	C	C	C	C	C	C	C	C	C	C	C	C	C	C	C
MT-10615-C-T-rs396553635	10615	C	T	C	C	C	C	C	C	C	C	C	C	C	C	C	C	C	C	C	C	C	C	C	C	C	C	C	C	C	C	C	C	C	C	C	C	C	C	C	C	C	C	C	C	C	C	C	C
MT-10648-C-T-no-rs	10648	C	T	C	C	C	C	C	C	C	C	C	C	C	C	C	C	C	C	C	C	C	C	C	C	C	C	C	C	C	C	C	C	C	C	C	C	C	C	C	C	C	C	C	C	C	C	C	C
MT-10667-A-G-no-rs	10667	A	G	A	A	A	A	A	A	A	A	A	A	A	A	A	A	A	A	A	A	A	A	A	A	A	A	A	A	A	A	A	A	A	A	A	A	A	A	A	A	A	A	A	A	A	A	A	A
MT-10688-G-A-no-rs	10688	G	A	G	G	G	G	G	G	G	G	G	G	G	G	G	G	G	G	G	G	G	G	G	G	G	G	G	G	G	G	G	G	G	G	G	G	G	G	G	G	G	G	G	G	G	G	G	G
MT-10766-G-A-no-rs	10766	G	A	G	G	G	G	G	G	G	G	G	G	G	G	G	G	G	G	G	G	G	G	G	A	G	G	G	G	G	G	G	G	G	G	G	G	G	G	G	G	G	G	G	G	G	G	G	G
MT-10829-G-C-no-rs	10829	G	C	C	C	C	C	C	C	C	C	C	C	C	C	C	C	C	C	C	C	C	C	C	C	C	C	C	C	C	C	C	C	C	C	C	C	C	C	C	C	C	C	C	C	C	C	C	C
MT-10834-T-C-no-rs	10834	T	C	T	T	T	T	T	T	T	T	T	T	T	T	T	T	T	T	T	T	T	T	T	T	T	T	T	T	T	T	T	T	T	T	T	T	T	T	T	T	T	T	T	T	T	T	T	T
MT-10852-C-T-no-rs	10852	C	T	C	C	C	C	C	C	C	C	C	C	C	C	C	C	C	C	C	C	C	C	C	C	C	C	C	C	C	C	C	C	C	C	C	C	C	C	C	C	C	C	C	C	C	C	C	C
MT-10855-A-G-no-rs	10855	A	G	A	A	A	A	A	A	A	A	A	A	A	A	A	A	A	A	A	A	A	A	A	A	A	A	A	A	A	A	A	A	A	A	A	A	A	A	A	A	A	A	A	A	A	A	A	A
MT-10861-C-T-no-rs	10861	C	T	C	C	T	C	T	T	T	T	C	C	C	C	C	C	C	T	C	T	C	C	C	C	C	T	C	T	T	T	C	C	T	C	C	T	C	T	C	T	C	C	C	C	C	C	T	T
MT-10879-T-C-no-rs	10879	T	C	T	T	T	T	T	T	T	T	T	T	T	T	T	T	T	T	T	T	T	T	T	T	T	T	T	T	T	T	T	T	T	T	T	T	T	T	T	T	T	T	T	T	T	T	T	T
MT-10882-C-T-no-rs	10882	C	T	C	C	C	C	C	C	C	C	C	C	C	C	C	C	C	C	C	C	C	C	C	C	C	C	C	C	C	C	C	C	C	C	C	C	C	C	C	C	C	C	C	C	C	C	C	C
MT-10885-A-G-no-rs	10885	A	G	A	A	A	A	A	A	A	A	A	A	A	A	A	A	A	A	A	A	A	A	A	A	A	A	A	A	A	A	A	A	A	A	A	A	A	A	A	A	A	A	A	A	A	A	A	A
MT-10906-T-C-no-rs	10906	T	C	T	T	T	T	T	T	T	T	T	T	T	T	T	T	T	T	T	T	T	T	T	T	T	T	T	T	T	T	T	T	T	T	T	T	T	T	T	T	T	T	T	T	T	T	T	T
MT-10916-C-T-no-rs	10916	C	T	C	C	C	C	C	C	C	C	C	C	C	C	C	C	C	C	C	C	C	C	C	C	C	C	C	C	C	C	C	C	C	C	C	C	C	C	C	C	C	C	C	C	C	C	C	C
MT-10921-A-G-no-rs	10921	A	G	A	A	A	A	A	A	A	A	A	A	A	A	A	A	A	A	A	A	A	A	A	A	A	A	A	A	A	A	A	A	A	A	A	A	A	A	A	A	A	A	A	A	A	A	A	A
MT-10947-C-T-no-rs	10947	C	T	C	C	C	C	C	C	C	C	C	C	C	C	C	C	C	C	C	C	C	C	C	C	C	C	C	C	C	C	C	C	C	C	C	C	C	C	C	C	C	C	C	C	C	C	C	C
MT-10951-A-G-no-rs	10951	A	G	A	A	A	A	A	A	A	A	A	A	A	A	A	A	A	A	A	A	A	A	A	A	A	A	A	A	A	A	A	A	A	A	A	A	A	A	A	A	A	A	A	A	A	A	A	A
MT-10963-A-G-no-rs	10963	A	G	A	A	A	A	A	A	A	A	A	A	A	A	A	A	A	A	A	A	A	A	A	A	A	A	A	A	A	A	A	A	A	A	A	A	A	A	A	A	A	A	A	A	A	A	A	A
MT-10969-C-T-no-rs	10969	C	T	C	C	C	C	C	C	C	C	C	C	C	C	C	C	C	C	C	C	C	C	C	C	C	C	C	C	C	C	C	C	C	C	C	C	C	C	C	C	C	C	C	C	C	C	C	C
MT-10984-C-T-no-rs	10984	C	T	C	C	C	C	C	C	C	C	C	C	C	C	C	C	C	C	C	C	C	C	C	C	C	C	C	C	C	C	C	C	C	C	C	C	C	C	C	C	C	C	C	C	C	C	C	C
MT-11002-G-A-no-rs	11002	G	A	G	G	G	G	G	G	G	G	G	G	G	G	G	G	G	G	G	G	G	G	G	G	G	G	G	G	G	G	G	G	G	G	G	G	G	G	G	G	G	G	G	G	G	G	G	G
MT-11023-T-C-no-rs	11023	T	C	T	T	T	T	T	T	T	T	T	T	T	T	T	T	T	T	T	T	T	T	T	T	T	T	T	T	T	T	T	T	T	T	T	T	T	T	T	T	T	T	T	T	T	T	T	T
MT-11035-G-A-no-rs	11035	G	A	G	G	G	G	G	G	G	G	G	G	G	G	G	G	G	G	G	G	G	G	G	G	G	G	G	G	G	G	G	G	G	G	G	G	G	G	G	G	G	G	G	G	G	G	G	G
MT-11044-C-T-no-rs	11044	C	T	C	C	C	C	C	C	C	C	C	C	C	C	C	C	C	C	C	C	C	C	C	C	C	C	C	C	C	C	C	C	C	C	C	C	C	C	C	C	C	C	C	C	C	C	C	C
MT-11048-C-T-no-rs	11048	C	T	C	C	C	C	C	C	C	C	C	C	C	C	C	C	C	C	C	C	C	C	C	C	C	C	C	C	C	C	C	C	C	C	C	C	C	C	C	C	C	C	C	C	C	C	C	C
MT-11059-T-C-no-rs	11059	T	C	T	T	T	T	T	T	T	T	T	T	T	T	T	T	T	T	T	T	T	T	T	T	T	T	T	T	T	T	T	T	T	T	T	T	T	T	T	T	T	T	T	T	T	T	T	T
MT-11086-A-G-no-rs	11086	A	G	A	A	A	A	A	A	A	A	A	A	A	A	A	A	A	A	A	A	A	A	A	A	A	A	A	A	A	A	A	A	A	A	A	A	A	A	A	A	A	A	A	A	A	A	A	A
MT-11098-C-T-no-rs	11098	C	T	C	C	C	C	C	C	C	C	C	C	C	C	C	C	C	C	C	C	C	C	C	C	C	C	C	C	C	C	C	C	C	C	C	C	C	C	C	C	C	C	C	C	C	C	C	C
MT-11110-C-T-no-rs	11110	C	T	C	C	C	C	C	C	C	C	C	C	C	C	C	C	C	C	C	C	C	C	C	C	C	C	C	C	C	C	C	C	C	C	C	C	C	C	C	C	C	C	C	C	C	C	C	C
MT-11137-A-G-no-rs	11137	A	G	A	A	A	A	A	A	A	A	A	A	A	A	A	A	A	A	A	A	A	A	A	A	A	A	A	A	A	A	A	A	A	A	A	A	A	A	A	A	A	A	A	A	A	A	A	A
MT-11140-T-C-no-rs	11140	T	C	T	T	T	T	T	T	T	T	T	T	T	T	T	T	T	T	T	T	T	T	T	T	T	T	T	T	T	T	T	T	T	T	T	T	T	T	T	T	T	T	T	T	T	T	T	T
MT-11212-T-C-no-rs	11212	T	C	T	T	T	T	T	T	T	T	T	T	T	T	T	T	T	T	T	T	T	T	T	T	T	T	T	T	T	T	T	T	T	T	T	T	T	T	T	T	T	T	T	T	T	T	T	T
MT-11311-C-T-no-rs	11311	C	T	C	C	C	C	C	C	C	C	C	C	C	C	C	C	C	C	C	C	C	C	C	C	C	C	C	C	C	C	C	C	C	C	C	C	C	C	C	C	C	C	C	C	C	C	C	C
MT-11419-C-T-no-rs	11419	C	T	C	C	C	C	C	C	C	C	C	C	C	C	C	C	C	C	C	C	C	C	C	C	C	C	C	C	C	C	C	C	C	C	C	C	C	C	C	C	C	C	C	C	C	C	C	C
MT-11459-T-C-no-rs	11459	T	C	T	T	T	T	T	T	T	T	T	T	T	T	T	T	T	T	T	T	T	T	T	T	T	T	T	T	T	T	T	T	T	T	T	T	T	T	T	T	T	T	T	T	T	T	T	T
MT-11482-T-C-no-rs	11482	T	C	T	T	T	T	T	T	T	T	T	T	T	T	T	T	T	T	T	T	T	T	T	T	T	T	T	T	T	T	T	T	T	T	T	T	T	T	T	T	T	T	T	T	T	T	T	T
MT-11488-T-C-no-rs	11488	T	C	T	T	T	T	T	T	T	T	T	T	T	T	T	T	T	T	T	T	T	T	T	T	T	T	T	T	T	T	T	T	T	T	T	T	T	T	T	T	T	T	T	T	T	T	T	T
MT-11515-G-A-no-rs	11515	G	A	G	G	G	G	G	G	G	G	G	G	G	G	G	G	G	G	G	G	G	G	G	G	G	G	G	G	G	G	G	G	G	G	G	G	G	G	G	G	G	G	G	G	G	G	G	G
MT-11545-A-G-no-rs	11545	A	G	A	G	G	G	G	G	G	G	G	G	G	G	G	G	G	G	G	G	G	G	G	A	G	G	G	G	G	G	G	G	G	G	G	G	G	G	G	G	G	G	G	G	G	G	G	G
MT-11557-T-C-no-rs	11557	T	C	T	T	T	T	T	T	T	T	T	T	T	T	T	T	T	T	T	T	T	T	T	T	T	T	T	T	T	T	T	T	T	T	T	T	T	T	T	T	T	T	T	T	T	T	T	T
MT-11563-T-C-no-rs	11563	T	C	T	T	T	T	T	T	T	T	T	T	T	T	T	T	T	T	T	T	T	T	T	T	T	T	T	T	T	T	T	T	T	T	T	T	T	T	T	T	T	T	T	T	T	T	T	T
MT-11617-A-G-no-rs	11617	A	G	A	A	A	A	A	A	A	A	A	A	A	A	A	A	A	A	A	A	A	A	A	A	A	A	A	A	A	A	A	A	A	A	A	A	A	A	A	A	A	A	A	A	A	A	A	A
MT-11633-T-C-no-rs	11633	T	C	T	T	T	T	T	T	T	T	T	T	T	T	T	T	T	T	T	T	T	T	T	T	T	T	T	T	T	T	T	T	T	T	T	T	T	T	T	T	T	T	T	T	T	T	T	T
MT-11684-C-T-rs394875929	11684	C	T	C	C	C	C	C	C	C	C	C	C	C	C	C	C	C	C	C	C	C	C	C	C	C	C	C	C	C	C	C	C	C	C	C	C	C	C	C	C	C	C	C	C	C	C	C	C
MT-11695-C-T-rs395577435	11695	C	T	C	C	C	C	C	C	C	C	C	C	C	C	C	C	C	C	C	C	C	C	C	C	C	C	C	C	C	C	C	C	C	C	C	C	C	C	C	C	C	C	C	C	C	C	C	C
MT-11701-T-C-no-rs	11701	T	C	T	T	T	T	T	T	T	T	T	T	T	T	T	T	T	T	T	T	T	T	T	T	T	T	T	T	T	T	T	T	T	T	T	T	T	T	T	T	T	T	T	T	T	T	T	T
MT-11726-A-G-rs869311972	11726	A	G	A	A	A	A	A	A	A	A	A	A	A	A	A	A	A	A	A	A	A	A	A	A	A	A	A	A	A	A	A	A	A	A	A	A	A	A	A	A	A	A	A	A	A	A	A	A
MT-11737-G-A-no-rs	11737	G	A	G	G	G	G	G	G	G	G	G	G	G	G	G	G	G	G	G	G	G	G	G	G	G	G	G	G	G	G	G	G	G	G	G	G	G	G	G	G	G	G	G	G	G	G	G	G
MT-11750-A-G-no-rs	11750	A	G	A	A	A	A	A	A	A	A	A	A	A	A	A	A	A	A	A	A	A	A	A	A	A	A	A	A	A	A	A	A	A	A	A	A	A	A	A	A	A	A	A	A	A	A	A	A
MT-11774-A-G-no-rs	11774	A	G	A	A	A	A	A	A	A	A	A	A	A	A	A	A	A	A	A	A	A	A	A	A	A	A	A	A	A	A	A	A	A	A	A	A	A	A	A	A	A	A	A	A	A	A	A	A
MT-11785-C-T-no-rs	11785	C	T	C	C	C	C	C	C	C	C	C	C	C	C	C	C	C	C	C	C	C	C	C	C	C	C	C	C	C	C	C	C	C	C	C	C	C	C	C	C	C	C	C	C	C	C	C	C
MT-11791-G-A-no-rs	11791	G	A	G	G	G	G	G	G	G	G	G	G	G	G	G	G	G	G	G	G	G	G	G	G	G	G	G	G	G	G	G	G	G	G	G	G	G	G	G	G	G	G	G	G	G	G	G	G
MT-11852-T-C-no-rs	11852	T	C	T	T	T	T	T	T	T	T	T	T	T	T	T	T	T	T	T	T	T	T	T	T	T	T	T	T	T	T	T	T	T	T	T	T	T	T	T	T	T	T	T	T	T	T	T	T
MT-11857-T-C-no-rs	11857	T	C	T	T	T	T	T	T	T	T	T	T	T	T	T	T	T	T	T	T	T	T	T	T	T	T	T	T	T	T	T	T	T	T	T	T	T	T	T	T	T	T	T	T	T	T	T	T
MT-11861-T-C-no-rs	11861	T	C	T	T	T	T	T	T	T	T	T	T	T	T	T	T	T	T	T	T	T	T	T	T	T	T	T	T	T	T	T	T	T	T	T	T	T	T	T	T	T	T	T	T	T	T	T	T
MT-11932-C-T-no-rs	11932	C	T	C	C	C	C	C	C	C	C	C	C	C	C	C	C	C	C	C	C	C	C	C	C	C	C	C	C	C	C	C	C	C	C	C	C	C	C	C	C	C	C	C	C	C	C	C	C
MT-11935-T-C-no-rs	11935	T	C	T	T	T	T	T	T	T	T	T	T	T	T	T	T	T	T	T	T	T	T	T	T	T	T	T	T	T	T	T	T	T	T	T	T	T	T	T	T	T	T	T	T	T	T	T	T
MT-11953-T-C-no-rs	11953	T	C	T	T	T	T	T	T	T	T	T	T	T	T	T	T	T	T	T	T	T	T	T	T	T	T	T	T	T	T	T	T	T	T	T	T	T	T	T	T	T	T	T	T	T	T	T	T
MT-11989-A-G-no-rs	11989	A	G	A	A	A	A	A	A	A	A	A	A	A	A	A	A	A	A	A	A	A	A	A	A	A	A	A	A	A	A	A	A	A	A	A	A	A	A	A	A	A	A	A	A	A	A	A	A
MT-12022-C-T-no-rs	12022	C	T	C	C	C	C	C	C	C	C	C	C	C	C	C	C	C	C	C	C	C	C	C	C	C	C	C	C	C	C	C	C	C	C	C	C	C	C	C	C	C	C	C	C	C	C	C	C
MT-12031-T-C-no-rs	12031	T	C	T	T	T	T	T	T	T	T	T	T	T	T	T	T	T	T	T	T	T	T	T	T	T	T	T	T	T	T	T	T	T	T	T	T	T	T	T	T	T	T	T	T	T	T	T	T
MT-12082-T-C-no-rs	12082	T	C	T	T	T	T	T	T	T	T	T	T	T	T	T	T	T	T	T	T	T	T	T	T	T	T	T	T	T	T	T	T	T	T	T	T	T	T	T	T	T	T	T	T	T	T	T	T
MT-12085-G-A-no-rs	12085	G	A	G	G	G	G	G	G	G	G	G	G	G	G	G	G	G	G	G	G	G	G	G	G	G	G	G	G	G	G	G	G	G	G	G	G	G	G	G	G	G	G	G	G	G	G	G	G
MT-12121-C-T-rs394296960	12121	C	T	C	C	C	C	C	C	C	C	C	C	C	C	C	C	C	C	C	C	C	C	C	C	C	C	C	C	C	C	C	C	C	C	C	C	C	C	C	C	C	C	C	C	C	C	C	C
MT-12178-C-T-no-rs	12178	C	T	C	C	C	C	C	C	C	C	C	C	C	C	C	C	C	C	C	C	C	C	C	C	C	C	C	C	C	C	C	C	C	C	C	C	C	C	C	C	C	C	C	C	C	C	C	C
MT-12184-T-C-no-rs	12184	T	C	T	T	T	T	T	T	T	T	T	T	T	T	T	T	T	T	T	T	T	T	T	T	T	T	T	T	T	T	T	T	T	T	T	T	T	T	T	T	T	T	T	T	T	T	T	T
MT-12193-T-C-no-rs	12193	T	C	T	T	T	T	T	T	T	T	T	T	T	T	T	T	T	T	T	T	T	T	T	T	T	T	T	T	T	T	T	T	T	T	T	T	T	T	T	T	T	T	T	T	T	T	T	T
MT-12202-G-A-rs396327263	12202	G	A	G	G	G	G	G	G	G	G	G	G	G	G	G	G	G	G	G	G	G	G	G	G	G	G	G	G	G	G	G	G	G	G	G	G	G	G	G	G	G	G	G	G	G	G	G	G
MT-12214-G-A-no-rs	12214	G	A	G	G	G	G	G	G	G	G	G	G	G	G	G	G	G	G	G	G	G	G	G	G	G	G	G	G	G	G	G	G	G	G	G	G	G	G	G	G	G	G	G	G	G	G	G	G
MT-12220-A-G-no-rs	12220	A	G	A	A	A	A	A	A	A	A	A	A	A	A	A	A	A	A	A	A	A	A	A	A	A	A	A	A	A	A	A	A	A	A	A	A	A	A	A	A	A	A	A	A	A	A	A	A
MT-12232-G-A-no-rs	12232	G	A	G	G	A	G	A	A	A	A	G	G	G	G	G	G	G	A	G	A	G	G	G	G	G	A	G	A	A	A	G	G	A	G	G	A	G	A	G	A	G	G	G	G	G	G	A	A
MT-12239-T-C-no-rs	12239	T	C	T	T	T	T	T	T	T	T	T	T	T	T	T	T	T	T	T	T	T	T	T	T	T	T	T	T	T	T	T	T	T	T	T	T	T	T	T	T	T	T	T	T	T	T	T	T
MT-12301-T-C-no-rs	12301	T	C	T	T	T	T	T	T	T	T	T	T	T	T	T	T	T	T	T	T	T	T	T	T	T	T	T	T	T	T	T	T	T	T	T	T	T	T	T	T	T	T	T	T	T	T	T	T
MT-12334-G-A-no-rs	12334	G	A	G	G	A	G	A	A	A	A	G	G	G	G	G	G	G	A	G	A	G	G	G	G	G	A	G	A	A	A	G	G	A	G	G	A	G	A	G	A	G	G	G	G	G	G	A	A
MT-12354-T-C-no-rs	12354	T	C	T	T	T	T	T	T	T	T	T	T	T	T	T	T	T	T	T	T	T	T	T	T	T	T	T	T	T	T	T	T	T	T	T	T	T	T	T	T	T	T	T	T	T	T	T	T
MT-12406-T-C-rs869311975	12406	T	C	T	T	C	T	C	C	C	C	T	T	T	T	T	T	T	C	T	C	T	T	T	T	T	C	T	C	C	C	T	T	C	T	T	C	T	C	T	C	T	T	T	T	T	T	C	C
MT-12424-A-G-no-rs	12424	A	G	A	A	A	A	A	A	A	A	A	A	A	A	A	A	A	A	A	A	A	A	A	A	A	A	A	A	A	A	A	A	A	A	A	A	A	A	A	A	A	A	A	A	A	A	A	A
MT-12445-T-C-rs869311976	12445	T	C	T	T	T	T	T	T	T	T	T	T	T	T	T	T	T	T	T	T	T	T	T	T	T	T	T	T	T	T	T	T	T	T	T	T	T	T	T	T	T	T	T	T	T	T	T	T
MT-12448-C-T-no-rs	12448	C	T	C	C	C	C	C	C	C	C	C	C	C	C	C	C	C	C	C	C	C	C	C	C	C	C	C	C	C	C	C	C	C	C	C	C	C	C	C	C	C	C	C	C	C	C	C	C
MT-12454-C-T-no-rs	12454	C	T	C	C	C	C	C	C	C	C	C	C	C	C	C	C	C	C	C	C	C	C	C	C	C	C	C	C	C	C	C	C	C	C	C	C	C	C	C	C	C	C	C	C	C	C	C	C
MT-12457-T-C-no-rs	12457	T	C	T	T	T	T	T	T	T	T	T	T	T	T	T	T	T	T	T	T	T	T	T	T	T	T	T	T	T	T	T	T	T	T	T	T	T	T	T	T	T	T	T	T	T	T	T	T
MT-12463-T-C-no-rs	12463	T	C	T	T	T	T	T	T	T	T	T	T	T	T	T	T	T	T	T	T	T	T	T	T	T	T	T	T	T	T	T	T	T	T	T	T	T	T	T	T	T	T	T	T	T	T	T	T
MT-12484-T-C-no-rs	12484	T	C	T	T	T	T	T	T	T	T	T	T	T	T	T	T	T	T	T	T	T	T	T	T	T	T	T	T	T	T	T	T	T	T	T	T	T	T	T	T	T	T	T	T	T	T	T	T
MT-12487-A-G-no-rs	12487	A	G	A	A	A	A	A	A	A	A	A	A	A	A	A	A	A	A	A	A	A	A	A	A	A	A	A	A	A	A	A	A	A	A	A	A	A	A	A	A	A	A	A	A	A	A	A	A
MT-12496-G-A-no-rs	12496	G	A	G	G	G	G	G	G	G	G	G	G	G	G	G	G	G	G	G	G	G	G	G	G	G	G	G	G	G	G	G	G	G	G	G	G	G	G	G	G	G	G	G	G	G	G	G	G
MT-12499-C-T-no-rs	12499	C	T	C	C	C	C	C	C	C	C	C	C	C	C	C	C	C	C	C	C	C	C	C	C	C	C	C	C	C	C	C	C	C	C	C	C	C	C	C	C	C	C	C	C	C	C	C	C
MT-12502-T-C-no-rs	12502	T	C	T	T	T	T	T	T	T	T	T	T	T	T	T	T	T	T	T	T	T	T	T	T	T	T	T	T	T	T	T	T	T	T	T	T	T	T	T	T	T	T	T	T	T	T	T	T
MT-12547-A-G-no-rs	12547	A	G	A	A	A	A	A	A	A	A	A	A	A	A	A	A	A	A	A	A	A	A	A	A	A	A	A	A	A	A	A	A	A	A	A	A	A	A	A	A	A	A	A	A	A	A	A	A
MT-12551-G-A-no-rs	12551	G	A	G	G	G	G	G	G	G	G	G	G	G	G	G	G	G	G	G	G	G	G	G	G	G	G	G	G	G	G	G	G	G	G	G	G	G	G	G	G	G	G	G	G	G	G	G	G
MT-12556-C-T-no-rs	12556	C	T	C	C	C	C	C	C	C	C	C	C	C	C	C	C	C	C	C	C	C	C	C	C	C	C	C	C	C	C	C	C	C	C	C	C	C	C	C	C	C	C	C	C	C	C	C	C
MT-12559-G-A-no-rs	12559	G	A	G	G	G	G	G	G	G	G	G	G	G	G	G	G	G	G	G	G	G	G	G	G	G	G	G	G	G	G	G	G	G	G	G	G	G	G	G	G	G	G	G	G	G	G	G	G
MT-12598-A-C-no-rs	12598	A	C	A	A	A	A	A	A	A	A	A	A	A	A	A	A	A	A	A	A	A	A	A	A	A	A	A	A	A	A	A	A	A	A	A	A	A	A	A	A	A	A	A	A	A	A	A	A
MT-12614-C-A-no-rs	12614	C	A	C	C	C	C	C	C	C	C	C	C	C	C	C	C	C	C	C	C	C	C	C	C	C	C	C	C	C	C	C	C	C	C	C	C	C	C	C	C	C	C	C	C	C	C	C	C
MT-12676-C-T-no-rs	12676	C	T	C	C	C	C	C	C	C	C	C	C	C	C	C	C	C	C	C	C	C	C	C	C	C	C	C	C	C	C	C	C	C	C	C	C	C	C	C	C	C	C	C	C	C	C	C	C
MT-12685-C-T-no-rs	12685	C	T	C	C	C	C	C	C	C	C	C	C	C	C	C	C	C	C	C	C	C	C	C	C	C	C	C	C	C	C	C	C	C	C	C	C	C	C	C	C	C	C	C	C	C	C	C	C
MT-12709-A-G-no-rs	12709	A	G	A	A	A	A	A	A	A	A	A	A	A	A	A	A	A	A	A	A	A	A	A	A	A	A	A	A	A	A	A	A	A	A	A	A	A	A	A	A	A	A	A	A	A	A	A	A
MT-12727-A-T-no-rs	12727	A	T	A	A	A	A	A	A	A	A	A	A	A	A	A	A	A	A	A	A	A	A	A	A	A	A	A	A	A	A	A	A	A	A	A	A	A	A	A	A	A	A	A	A	A	A	A	A
MT-12793-T-C-no-rs	12793	T	C	T	T	T	T	T	T	T	T	T	T	T	T	T	T	T	T	T	T	T	T	T	T	T	T	T	T	T	T	T	T	T	T	T	T	T	T	T	T	T	T	T	T	T	T	T	T
MT-12834-A-G-no-rs	12834	A	G	A	A	A	A	A	A	A	A	A	A	A	A	A	A	A	A	A	A	A	A	A	A	A	A	A	A	A	A	A	A	A	A	A	A	A	A	A	A	A	A	A	A	A	A	A	A
MT-12844-A-G-no-rs	12844	A	G	A	A	A	A	A	A	A	A	A	A	A	A	A	A	A	A	A	A	A	A	A	A	A	A	A	A	A	A	A	A	A	A	A	A	A	A	A	A	A	A	A	A	A	A	A	A
MT-12847-T-C-no-rs	12847	T	C	T	T	T	T	T	T	T	T	T	T	T	T	T	T	T	T	T	T	T	T	T	T	T	T	T	T	T	T	T	T	T	T	T	T	T	T	T	T	T	T	T	T	T	T	T	T
MT-12868-A-G-no-rs	12868	A	G	A	A	A	A	A	A	A	A	A	A	A	A	A	A	A	A	A	A	A	A	A	A	A	A	A	A	A	A	A	A	A	A	A	A	A	A	A	A	A	A	A	A	A	A	A	A
MT-12877-A-G-no-rs	12877	A	G	A	A	A	A	A	A	A	A	A	A	A	A	A	A	A	A	A	A	A	A	A	A	A	A	A	A	A	A	A	A	A	A	A	A	A	A	A	A	A	A	A	A	A	A	A	A
MT-12898-T-C-rs397323879	12898	T	C	T	T	T	T	T	T	T	T	T	T	T	T	T	T	T	T	T	T	T	T	T	T	T	T	T	T	T	T	T	T	T	T	T	T	T	T	T	T	T	T	T	T	T	T	T	T
MT-12907-T-C-no-rs	12907	T	C	T	T	T	T	T	T	T	T	T	T	T	T	T	T	T	T	T	T	T	T	T	T	T	T	T	T	T	T	T	T	T	T	T	T	T	T	T	T	T	T	T	T	T	T	T	T
MT-12913-C-T-no-rs	12913	C	T	C	C	C	C	C	C	C	C	C	C	C	C	C	C	C	C	C	C	C	C	C	C	C	C	C	C	C	C	C	C	C	C	C	C	C	C	C	C	C	C	C	C	C	C	C	C
MT-12916-T-C-no-rs	12916	T	C	T	T	T	T	T	T	T	T	T	T	T	T	T	T	T	T	T	T	T	T	T	T	T	T	T	T	T	T	T	T	T	T	T	T	T	T	T	T	T	T	T	T	T	T	T	T
MT-12931-T-A-no-rs	12931	T	A	T	T	T	T	T	T	T	T	T	T	T	T	T	T	T	T	T	T	T	T	T	T	T	T	T	T	T	T	T	T	T	T	T	T	T	T	T	T	T	T	T	T	T	T	T	T
MT-12934-T-C-no-rs	12934	T	C	T	T	T	T	T	T	T	T	T	T	T	T	T	T	T	T	T	T	T	T	T	T	T	T	T	T	T	T	T	T	T	T	T	T	T	T	T	T	T	T	T	T	T	T	T	T
MT-12949-C-T-no-rs	12949	C	T	C	C	C	C	C	C	C	C	C	C	C	C	C	C	C	C	C	C	C	C	C	C	C	C	C	C	C	C	C	C	C	C	C	C	C	C	C	C	C	C	C	C	C	C	C	C
MT-12952-C-T-rs394631413	12952	C	T	C	C	C	C	C	C	C	C	C	C	C	C	C	C	C	C	C	C	C	C	C	C	C	C	C	C	C	C	C	C	C	C	C	C	C	C	C	C	C	C	C	C	C	C	C	C
MT-13051-T-C-rs395669129	13051	T	C	T	C	C	C	C	C	C	C	C	C	C	C	C	C	C	C	C	C	C	C	C	T	C	C	C	C	C	C	C	C	C	C	C	C	C	C	C	C	C	C	C	C	C	C	C	C
MT-13078-A-G-no-rs	13078	A	G	A	A	A	A	A	A	A	A	A	A	A	A	A	A	A	A	A	A	A	A	A	A	A	A	A	A	A	A	A	A	A	A	A	A	A	A	A	A	A	A	A	A	A	A	A	A
MT-13081-G-A-no-rs	13081	G	A	G	G	G	G	G	G	G	G	G	G	G	G	G	G	G	G	G	G	G	G	G	G	G	G	G	G	G	G	G	G	G	G	G	G	G	G	G	G	G	G	G	G	G	G	G	G
MT-13102-G-A-no-rs	13102	G	A	G	G	G	G	G	G	G	G	G	G	G	G	G	G	G	G	G	G	G	G	G	G	G	G	G	G	G	G	G	G	G	G	G	G	G	G	G	G	G	G	G	G	G	G	G	G
MT-13106-T-A-no-rs	13106	T	A	T	T	T	T	T	T	T	T	T	T	T	T	T	T	T	T	T	T	T	T	T	T	T	T	T	T	T	T	T	T	T	T	T	T	T	T	T	T	T	T	T	T	T	T	T	T
MT-13120-T-C-no-rs	13120	T	C	T	T	T	T	T	T	T	T	T	T	T	T	T	T	T	T	T	T	T	T	T	T	T	T	T	T	T	T	T	T	T	T	T	T	T	T	T	T	T	T	T	T	T	T	T	T
MT-13126-C-T-no-rs	13126	C	T	C	C	C	C	C	C	C	C	C	C	C	C	C	C	C	C	C	C	C	C	C	C	C	C	C	C	C	C	C	C	C	C	C	C	C	C	C	C	C	C	C	C	C	C	C	C
MT-13129-T-C-no-rs	13129	T	C	T	T	T	T	T	T	T	T	T	T	T	T	T	T	T	T	T	T	T	T	T	T	T	T	T	T	T	T	T	T	T	T	T	T	T	T	T	T	T	T	T	T	T	T	T	T
MT-13144-C-T-no-rs	13144	C	T	C	C	C	C	C	C	C	C	C	C	C	C	C	C	C	C	C	C	C	C	C	C	C	C	C	C	C	C	C	C	C	C	C	C	C	C	C	C	C	C	C	C	C	C	C	C
MT-13154-T-C-no-rs	13154	T	C	T	T	T	T	T	T	T	T	T	T	T	T	T	T	T	T	T	T	T	T	T	T	T	T	T	T	T	T	T	T	T	T	T	T	T	T	T	T	T	T	T	T	T	T	T	T
MT-13166-A-G-no-rs	13166	A	G	A	A	A	A	A	A	A	A	A	A	A	A	A	A	A	A	A	A	A	A	A	A	A	A	A	A	A	A	A	A	A	A	A	A	A	A	A	A	A	A	A	A	A	A	A	A
MT-13171-T-C-no-rs	13171	T	C	T	T	T	T	T	T	T	T	T	T	T	T	T	T	T	T	T	T	T	T	T	T	T	T	T	T	T	T	T	T	T	T	T	T	T	T	T	T	T	T	T	T	T	T	T	T
MT-13189-C-T-no-rs	13189	C	T	C	C	C	C	C	C	C	C	C	C	C	C	C	C	C	C	C	C	C	C	C	C	C	C	C	C	C	C	C	C	C	C	C	C	C	C	C	C	C	C	C	C	C	C	C	C
MT-13204-C-T-no-rs	13204	C	T	C	C	C	C	C	C	C	C	C	C	C	C	C	C	C	C	C	C	C	C	C	C	C	C	C	C	C	C	C	C	C	C	C	C	C	C	C	C	C	C	C	C	C	C	C	C
MT-13206-C-T-no-rs	13206	C	T	C	C	C	C	C	C	C	C	C	C	C	C	C	C	C	C	C	C	C	C	C	C	C	C	C	C	C	C	C	C	C	C	C	C	C	C	C	C	C	C	C	C	C	C	C	C
MT-13211-G-A-no-rs	13211	G	A	G	G	G	G	G	G	G	G	G	G	G	G	G	G	G	G	G	G	G	G	G	G	G	G	G	G	G	G	G	G	G	G	G	G	G	G	G	G	G	G	G	G	G	G	G	G
MT-13228-A-G-no-rs	13228	A	G	A	A	A	A	A	A	A	A	A	A	A	A	A	A	A	A	A	A	A	A	A	A	A	A	A	A	A	A	A	A	A	A	A	A	A	A	A	A	A	A	A	A	A	A	A	A
MT-13231-T-C-no-rs	13231	T	C	T	T	T	T	T	T	T	T	T	T	T	T	T	T	T	T	T	T	T	T	T	T	T	T	T	T	T	T	T	T	T	T	T	T	T	T	T	T	T	T	T	T	T	T	T	T
MT-13234-T-C-no-rs	13234	T	C	T	T	T	T	T	T	T	T	T	T	T	T	T	T	T	T	T	T	T	T	T	T	T	T	T	T	T	T	T	T	T	T	T	T	T	T	T	T	T	T	T	T	T	T	T	T
MT-13240-A-G-no-rs	13240	A	G	A	A	A	A	A	A	A	A	A	A	A	A	A	A	A	A	A	A	A	A	A	A	A	A	A	A	A	A	A	A	A	A	A	A	A	A	A	A	A	A	A	A	A	A	A	A
MT-13246-C-T-no-rs	13246	C	T	C	C	C	C	C	C	C	C	C	C	C	C	C	C	C	C	C	C	C	C	C	C	C	C	C	C	C	C	C	C	C	C	C	C	C	C	C	C	C	C	C	C	C	C	C	C
MT-13258-A-G-no-rs	13258	A	G	A	A	A	A	A	A	A	A	A	A	A	A	A	A	A	A	A	A	A	A	A	A	A	A	A	A	A	A	A	A	A	A	A	A	A	A	A	A	A	A	A	A	A	A	A	A
MT-13261-A-G-no-rs	13261	A	G	A	A	A	A	A	A	A	A	A	A	A	A	A	A	A	A	A	A	A	A	A	A	A	A	A	A	A	A	A	A	A	A	A	A	A	A	A	A	A	A	A	A	A	A	A	A
MT-13276-T-C-no-rs	13276	T	C	T	T	T	T	T	T	T	T	T	T	T	T	T	T	T	T	T	T	T	T	T	T	T	T	T	T	T	T	T	T	T	T	T	T	T	T	T	T	T	T	T	T	T	T	T	T
MT-13282-A-G-no-rs	13282	A	G	A	A	A	A	A	A	A	A	A	A	A	A	A	A	A	A	A	A	A	A	A	A	A	A	A	A	A	A	A	A	A	A	A	A	A	A	A	A	A	A	A	A	A	A	A	A
MT-13311-A-G-no-rs	13311	A	G	A	A	A	A	A	A	A	A	A	A	A	A	A	A	A	A	A	A	A	A	A	A	A	A	A	A	A	A	A	A	A	A	A	A	A	A	A	A	A	A	A	A	A	A	A	A
MT-13335-A-G-rs397216633	13335	A	G	A	G	G	G	G	G	G	G	G	G	G	G	G	G	G	G	G	G	G	G	G	A	G	G	G	G	G	G	G	G	G	G	G	G	G	G	G	G	G	G	G	G	G	G	G	G
MT-13358-C-T-no-rs	13358	C	T	C	C	C	C	C	C	C	C	C	C	C	C	C	C	C	C	C	C	C	C	C	C	C	C	C	C	C	C	C	C	C	C	C	C	C	C	C	C	C	C	C	C	C	C	C	C
MT-13369-C-T-no-rs	13369	C	T	C	C	C	C	C	C	C	C	C	C	C	C	C	C	C	C	C	C	C	C	C	C	C	C	C	C	C	C	C	C	C	C	C	C	C	C	C	C	C	C	C	C	C	C	C	C
MT-13372-A-G-no-rs	13372	A	G	A	A	G	A	G	G	G	G	A	A	A	A	A	A	A	G	A	G	A	A	A	A	A	G	A	G	G	G	A	A	G	A	A	G	A	G	A	G	A	A	A	A	A	A	G	G
MT-13465-C-T-no-rs	13465	C	T	C	C	T	C	T	T	T	T	C	C	C	C	C	C	C	T	C	T	C	C	C	C	C	T	C	T	T	T	C	C	T	C	C	T	C	T	C	T	C	C	C	C	C	C	T	T
MT-13468-G-A-no-rs	13468	G	A	G	G	A	G	A	A	A	A	G	G	G	G	G	G	G	A	G	A	G	G	G	G	G	A	G	A	A	A	G	G	A	G	G	A	G	A	G	A	G	G	G	G	G	G	A	A
MT-13486-G-A-no-rs	13486	G	A	G	G	G	G	G	G	G	G	G	G	G	G	G	G	G	G	G	G	G	G	G	G	G	G	G	G	G	G	G	G	G	G	G	G	G	G	G	G	G	G	G	G	G	G	G	G
MT-13489-C-T-no-rs	13489	C	T	C	C	C	C	C	C	C	C	C	C	C	C	C	C	C	C	C	C	C	C	C	C	C	C	C	C	C	C	C	C	C	C	C	C	C	C	C	C	C	C	C	C	C	C	C	C
MT-13528-A-C-no-rs	13528	A	C	A	A	A	A	A	A	A	A	A	A	A	A	A	A	A	A	A	A	A	A	A	A	A	A	A	A	A	A	A	A	A	A	A	A	A	A	A	A	A	A	A	A	A	A	A	A
MT-13561-C-T-no-rs	13561	C	T	C	C	C	C	C	C	C	C	C	C	C	C	C	C	C	C	C	C	C	C	C	C	C	C	C	C	C	C	C	C	C	C	C	C	C	C	C	C	C	C	C	C	C	C	C	C
MT-13567-T-C-no-rs	13567	T	C	T	T	T	T	T	T	T	T	T	T	T	T	T	T	T	T	T	T	T	T	T	T	T	T	T	T	T	T	T	T	T	T	T	T	T	T	T	T	T	T	T	T	T	T	T	T
MT-13569-C-T-no-rs	13569	C	T	C	C	C	C	C	C	C	C	C	C	C	C	C	C	C	C	C	C	C	C	C	C	C	C	C	C	C	C	C	C	C	C	C	C	C	C	C	C	C	C	C	C	C	C	C	C
MT-13573-A-G-no-rs	13573	A	G	A	A	A	A	A	A	A	A	A	A	A	A	A	A	A	A	A	A	A	A	A	A	A	A	A	A	A	A	A	A	A	A	A	A	A	A	A	A	A	A	A	A	A	A	A	A
MT-13617-C-T-no-rs	13617	C	T	C	C	C	C	C	C	C	C	C	C	C	C	C	C	C	C	C	C	C	C	C	C	C	C	C	C	C	C	C	C	C	C	C	C	C	C	C	C	C	C	C	C	C	C	C	C
MT-13631-G-A-no-rs	13631	G	A	G	G	A	G	A	A	A	A	G	G	G	G	G	G	G	A	G	A	G	G	G	G	G	A	G	A	A	A	G	G	A	G	G	A	G	A	G	A	G	G	G	G	G	G	A	A
MT-13635-C-T-no-rs	13635	C	T	C	C	C	C	C	C	C	C	C	C	C	C	C	C	C	C	C	C	C	C	C	C	C	C	C	C	C	C	C	C	C	C	C	C	C	C	C	C	C	C	C	C	C	C	C	C
MT-13638-T-C-no-rs	13638	T	C	T	T	T	T	T	T	T	T	T	T	T	T	T	T	T	T	T	T	T	T	T	T	T	T	T	T	T	T	T	T	T	T	T	T	T	T	T	T	T	T	T	T	T	T	T	T
MT-13652-T-C-no-rs	13652	T	C	T	T	T	T	T	T	T	T	T	T	T	T	T	T	T	T	T	T	T	T	T	T	T	T	T	T	T	T	T	T	T	T	T	T	T	T	T	T	T	T	T	T	T	T	T	T
MT-13698-T-C-no-rs	13698	T	C	T	T	T	T	T	T	T	T	T	T	T	T	T	T	T	T	T	T	T	T	T	T	T	T	T	T	T	T	T	T	T	T	T	T	T	T	T	T	T	T	T	T	T	T	T	T
MT-13711-G-A-rs394781943	13711	G	A	A	A	A	A	A	A	A	A	A	A	A	A	A	A	A	A	A	A	A	A	A	A	A	A	A	A	A	A	A	A	A	A	A	A	A	A	A	A	A	A	A	A	A	A	A	A
MT-13722-T-C-rs869311978	13722	T	C	T	T	T	T	T	T	T	T	T	T	T	T	T	T	T	T	T	T	T	T	T	T	T	T	T	T	T	T	T	T	T	T	T	T	T	T	T	T	T	T	T	T	T	T	T	T
MT-13744-G-T-rs396186466	13744	G	T	T	T	T	T	T	T	T	T	T	T	T	T	T	T	T	T	T	T	T	T	T	T	T	T	T	T	T	T	T	T	T	T	T	T	T	T	T	T	T	T	T	T	T	T	T	T
MT-13763-T-C-rs869311979	13763	T	C	T	T	T	T	T	T	T	T	T	T	T	T	T	T	T	T	T	T	T	T	T	T	T	T	T	T	T	T	T	T	T	T	T	T	T	T	T	T	T	T	T	T	T	T	T	T
MT-13767-C-T-no-rs	13767	C	T	C	C	C	C	C	C	C	C	C	C	C	C	C	C	C	C	C	C	C	C	C	C	C	C	C	C	C	C	C	C	C	C	C	C	C	C	C	C	C	C	C	C	C	C	C	C
MT-13818-C-T-rs869311980	13818	C	T	C	C	C	C	C	C	C	C	C	C	C	C	C	C	C	C	C	C	C	C	C	T	C	C	C	C	C	C	C	C	C	C	C	C	C	C	C	C	C	C	C	C	C	C	C	C
MT-13825-A-G-no-rs	13825	A	G	A	A	A	A	A	A	A	A	A	A	A	A	A	A	A	A	A	A	A	A	A	A	A	A	A	A	A	A	A	A	A	A	A	A	A	A	A	A	A	A	A	A	A	A	A	A
MT-13830-T-C-no-rs	13830	T	C	T	T	T	T	T	T	T	T	T	T	T	T	T	T	T	T	T	T	T	T	T	T	T	T	T	T	T	T	T	T	T	T	T	T	T	T	T	T	T	T	T	T	T	T	T	T
MT-13839-T-C-no-rs	13839	T	C	T	T	T	T	T	T	T	T	T	T	T	T	T	T	T	T	T	T	T	T	T	T	T	T	T	T	T	T	T	T	T	T	T	T	T	T	T	T	T	T	T	T	T	T	T	T
MT-13842-C-T-no-rs	13842	C	T	C	C	C	C	C	C	C	C	C	C	C	C	C	C	C	C	C	C	C	C	C	C	C	C	C	C	C	C	C	C	C	C	C	C	C	C	C	C	C	C	C	C	C	C	C	C
MT-13848-A-G-no-rs	13848	A	G	A	A	A	A	A	A	A	A	A	A	A	A	A	A	A	A	A	A	A	A	A	A	A	A	A	A	A	A	A	A	A	A	A	A	A	A	A	A	A	A	A	A	A	A	A	A
MT-13856-T-C-no-rs	13856	T	C	T	T	T	T	T	T	T	T	T	T	T	T	T	T	T	T	T	T	T	T	T	T	T	T	T	T	T	T	T	T	T	T	T	T	T	T	T	T	T	T	T	T	T	T	T	T
MT-13872-C-T-no-rs	13872	C	T	C	C	C	C	C	C	C	C	C	C	C	C	C	C	C	C	C	C	C	C	C	C	C	C	C	C	C	C	C	C	C	C	C	C	C	C	C	C	C	C	C	C	C	C	C	C
MT-13893-C-T-no-rs	13893	C	T	C	C	C	C	C	C	C	C	C	C	C	C	C	C	C	C	C	C	C	C	C	C	C	C	C	C	C	C	C	C	C	C	C	C	C	C	C	C	C	C	C	C	C	C	C	C
MT-13926-T-C-no-rs	13926	T	C	T	T	T	T	T	T	T	T	T	T	T	T	T	T	T	T	T	T	T	T	T	T	T	T	T	T	T	T	T	T	T	T	T	T	T	T	T	T	T	T	T	T	T	T	T	T
MT-13935-A-G-no-rs	13935	A	G	A	A	G	A	G	G	G	G	A	A	A	A	A	A	A	G	A	G	A	A	A	A	A	G	A	G	G	G	A	A	G	A	A	G	A	G	A	G	A	A	A	A	A	A	G	G
MT-13941-C-T-no-rs	13941	C	T	C	C	C	C	C	C	C	C	C	C	C	C	C	C	C	C	C	C	C	C	C	C	C	C	C	C	C	C	C	C	C	C	C	C	C	C	C	C	C	C	C	C	C	C	C	C
MT-13953-C-T-no-rs	13953	C	T	C	C	C	C	C	C	C	C	C	C	C	C	C	C	C	C	C	C	C	C	C	C	C	C	C	C	C	C	C	C	C	C	C	C	C	C	C	C	C	C	C	C	C	C	N	C
MT-13959-C-T-no-rs	13959	C	T	C	C	C	C	C	C	C	C	C	C	C	C	C	C	C	C	C	C	C	C	C	C	C	C	C	C	C	C	C	C	C	C	C	C	C	C	C	C	C	C	C	C	C	C	C	C
MT-14021-C-T-no-rs	14021	C	T	C	C	C	C	C	C	C	C	C	C	C	C	C	C	C	C	C	C	C	C	C	C	C	C	C	C	C	C	C	C	C	C	C	C	C	C	C	C	C	C	C	C	C	C	C	C
MT-14040-T-C-no-rs	14040	T	C	T	T	T	T	T	T	T	T	T	T	T	T	T	T	T	T	T	T	T	T	T	T	T	T	T	T	T	T	T	T	T	T	T	T	T	T	T	T	T	T	T	T	T	T	T	T
MT-14058-C-A-no-rs	14058	C	A	C	C	C	C	C	C	C	C	C	C	C	C	C	C	C	C	C	C	C	C	C	C	C	C	C	C	C	C	C	C	C	C	C	C	C	C	C	C	C	C	C	C	C	C	C	C
MT-14061-C-T-no-rs	14061	C	T	C	C	C	C	C	C	C	C	C	C	C	C	C	C	C	C	C	C	C	C	C	C	C	C	C	C	C	C	C	C	C	C	C	C	C	C	C	C	C	C	C	C	C	C	C	C
MT-14069-T-C-no-rs	14069	T	C	T	T	T	T	T	T	T	T	T	T	T	T	T	T	T	T	T	T	T	T	T	T	T	T	T	T	T	T	T	T	T	T	T	T	T	T	T	T	T	T	T	T	T	T	T	T
MT-14150-T-C-no-rs	14150	T	C	T	T	T	T	T	T	T	T	T	T	T	T	T	T	T	T	T	T	T	T	T	T	T	T	T	T	T	T	T	T	T	T	T	T	T	T	T	T	T	T	T	T	T	T	T	T
MT-14177-T-C-no-rs	14177	T	C	T	T	T	T	T	T	T	T	T	T	T	T	T	T	T	T	T	T	T	T	T	T	T	T	T	T	T	T	T	T	T	T	T	T	T	T	T	T	T	T	T	T	T	T	T	T
MT-14186-C-T-no-rs	14186	C	T	C	C	C	C	C	C	C	C	C	C	C	C	C	C	C	C	C	C	C	C	C	C	C	C	C	C	C	C	C	C	C	C	C	C	C	C	C	C	C	C	C	C	C	C	C	C
MT-14202-G-A-no-rs	14202	G	A	G	G	G	G	G	G	G	G	G	G	G	G	G	G	G	G	G	G	G	G	G	G	G	G	G	G	G	G	G	G	G	G	G	G	G	G	G	G	G	G	G	G	G	G	G	G
MT-14208-T-C-no-rs	14208	T	C	T	T	T	T	T	T	T	T	T	T	T	T	T	T	T	T	T	T	T	T	T	T	T	T	T	T	T	T	T	T	T	T	T	T	T	T	T	T	T	T	T	T	T	T	T	T
MT-14214-A-G-no-rs	14214	A	G	A	A	A	A	A	A	A	A	A	A	A	A	A	A	A	A	A	A	A	A	A	A	A	A	A	A	A	A	A	A	A	A	A	A	A	A	A	A	A	A	A	A	A	A	A	A
MT-14233-C-A-no-rs	14233	C	A	C	C	C	C	C	C	C	C	C	C	C	C	C	C	C	C	C	C	C	C	C	C	C	C	C	C	C	C	C	C	C	C	C	C	C	C	C	C	C	C	C	C	C	C	C	C
MT-14244-T-C-no-rs	14244	T	C	T	T	T	T	T	T	T	T	T	T	T	T	T	T	T	T	T	T	T	T	T	T	T	T	T	T	T	T	T	T	T	T	T	T	T	T	T	T	T	T	T	T	T	T	T	T
MT-14250-A-G-no-rs	14250	A	G	A	A	A	A	A	A	A	A	A	A	A	A	A	A	A	A	A	A	A	A	A	A	A	A	A	A	A	A	A	A	A	A	A	A	A	A	A	A	A	A	A	A	A	A	A	A
MT-14254-G-A-no-rs	14254	G	A	G	G	G	G	G	G	G	G	G	G	G	G	G	G	G	G	G	G	G	G	G	G	G	G	G	G	G	G	G	G	G	G	G	G	G	G	G	G	G	G	G	G	G	G	G	G
MT-14286-C-T-no-rs	14286	C	T	C	C	C	C	C	C	C	C	C	C	C	C	C	C	C	C	C	C	C	C	C	C	C	C	C	C	C	C	C	C	C	C	C	C	C	C	C	C	C	C	C	C	C	C	C	C
MT-14323-T-C-no-rs	14323	T	C	T	T	T	T	T	T	T	T	T	T	T	T	T	T	T	T	T	T	T	T	T	T	T	T	T	T	T	T	T	T	T	T	T	T	T	T	T	T	T	T	T	T	T	T	T	T
MT-14337-C-T-no-rs	14337	C	T	C	C	C	C	C	C	C	C	C	C	C	C	C	C	C	C	C	C	C	C	C	C	C	C	C	C	C	C	C	C	C	C	C	C	C	C	C	C	C	C	C	C	C	C	C	C
MT-14352-C-T-no-rs	14352	C	T	C	T	C	T	C	C	C	C	T	T	T	T	T	T	T	C	T	C	T	T	T	C	T	C	T	C	C	C	T	T	C	T	T	C	T	C	T	C	T	T	T	T	T	T	C	C
MT-14356-T-C-no-rs	14356	T	C	T	T	T	T	T	T	T	T	T	T	T	T	T	T	T	T	T	T	T	T	T	T	T	T	T	T	T	T	T	T	T	T	T	T	T	T	T	T	T	T	T	T	T	T	T	T
MT-14361-C-T-no-rs	14361	C	T	C	C	C	C	C	C	C	C	C	C	C	C	C	C	C	C	C	C	C	C	C	C	C	C	C	C	C	C	C	C	C	C	C	C	C	C	C	C	C	C	C	C	C	C	C	C
MT-14370-T-C-no-rs	14370	T	C	T	T	T	T	T	T	T	T	T	T	T	T	T	T	T	T	T	T	T	T	T	T	T	T	T	T	T	T	T	T	T	T	T	T	T	T	T	T	T	T	T	T	T	T	T	T
MT-14385-C-A-no-rs	14385	C	A	C	C	C	C	C	C	C	C	C	C	C	C	C	C	C	C	C	C	C	C	C	C	C	C	C	C	C	C	C	C	C	C	C	C	C	C	C	C	C	C	C	C	C	C	C	C
MT-14388-T-C-no-rs	14388	T	C	T	T	T	T	T	T	T	T	T	T	T	T	T	T	T	T	T	T	T	T	T	T	T	T	T	T	T	T	T	T	T	T	T	T	T	T	T	T	T	T	T	T	T	T	T	T
MT-14391-C-T-no-rs	14391	C	T	C	C	C	C	C	C	C	C	C	C	C	C	C	C	C	C	C	C	C	C	C	C	C	C	C	C	C	C	C	C	C	C	C	C	C	C	C	C	C	C	C	C	C	C	C	C
MT-14451-A-C-no-rs	14451	A	C	A	A	A	A	A	A	A	A	A	A	A	A	A	A	A	A	A	A	A	A	A	A	A	A	A	A	A	A	A	A	A	A	A	A	A	A	A	A	A	A	A	A	A	A	A	A
MT-14460-T-C-no-rs	14460	T	C	T	T	T	T	T	T	T	T	T	T	T	T	T	T	T	T	T	T	T	T	T	T	T	T	T	T	T	T	T	T	T	T	T	T	T	T	T	T	T	T	T	T	T	T	T	T
MT-14472-C-T-no-rs	14472	C	T	C	C	C	C	C	C	C	C	C	C	C	C	C	C	C	C	C	C	C	C	C	C	C	C	C	C	C	C	C	C	C	C	C	C	C	C	C	C	C	C	C	C	C	C	C	C
MT-14475-T-C-no-rs	14475	T	C	T	T	T	T	T	T	T	T	T	T	T	T	T	T	T	T	T	T	T	T	T	T	T	T	T	T	T	T	T	T	T	T	T	T	T	T	T	T	T	T	T	T	T	T	T	T
MT-14484-A-G-no-rs	14484	A	G	A	A	A	A	A	A	A	A	A	A	A	A	A	A	A	A	A	A	A	A	A	A	A	A	A	A	A	A	A	A	A	A	A	A	A	A	A	A	A	A	A	A	A	A	A	A
MT-14499-C-T-no-rs	14499	C	T	C	C	C	C	C	C	C	C	C	C	C	C	C	C	C	C	C	C	C	C	C	C	C	C	C	C	C	C	C	C	C	C	C	C	C	C	C	C	C	C	C	C	C	C	C	C
MT-14502-C-T-no-rs	14502	C	T	C	C	C	C	C	C	C	C	C	C	C	C	C	C	C	C	C	C	C	C	C	C	C	C	C	C	C	C	C	C	C	C	C	C	C	C	C	C	C	C	C	C	C	C	C	C
MT-14505-T-C-no-rs	14505	T	C	T	T	T	T	T	T	T	T	T	T	T	T	T	T	T	T	T	T	T	T	T	T	T	T	T	T	T	T	T	T	T	T	T	T	T	T	T	T	T	T	T	T	T	T	T	T
MT-14520-G-A-no-rs	14520	G	A	G	G	G	G	G	G	G	G	G	G	G	G	G	G	G	G	G	G	G	G	G	G	G	G	G	G	G	G	G	G	G	G	G	G	G	G	G	G	G	G	G	G	G	G	G	G
MT-14531-T-C-no-rs	14531	T	C	T	T	T	T	T	T	T	T	T	T	T	T	T	T	T	T	T	T	T	T	T	T	T	T	T	T	T	T	T	T	T	T	T	T	T	T	T	T	T	T	T	T	T	T	T	T
MT-14538-C-T-no-rs	14538	C	T	C	C	C	C	C	C	C	C	C	C	C	C	C	C	C	C	C	C	C	C	C	C	C	C	C	C	C	C	C	C	C	C	C	C	C	C	C	C	C	C	C	C	C	C	C	C
MT-14553-A-G-no-rs	14553	A	G	A	A	A	A	A	A	A	A	A	A	A	A	A	A	A	A	A	A	A	A	A	A	A	A	A	A	A	A	A	A	A	A	A	A	A	A	A	A	A	A	A	A	A	A	A	A
MT-14562-T-C-no-rs	14562	T	C	T	T	T	T	T	T	T	T	T	T	T	T	T	T	T	T	T	T	T	T	T	T	T	T	T	T	T	T	T	T	T	T	T	T	T	T	T	T	T	T	T	T	T	T	T	T
MT-14574-G-A-no-rs	14574	G	A	G	G	G	G	G	G	G	G	G	G	G	G	G	G	G	G	G	G	G	G	G	G	G	G	G	G	G	G	G	G	G	G	G	G	G	G	G	G	G	G	G	G	G	G	G	G
MT-14595-C-A-no-rs	14595	C	A	C	C	C	C	C	C	C	C	C	C	C	C	C	C	C	C	C	C	C	C	C	C	C	C	C	C	C	C	C	C	C	C	C	C	C	C	C	C	C	C	C	C	C	C	C	C
MT-14607-T-C-no-rs	14607	T	C	T	T	T	T	T	T	T	T	T	T	T	T	T	T	T	T	T	T	T	T	T	T	T	T	T	T	T	T	T	T	T	T	T	T	T	T	T	T	T	T	T	T	T	T	T	T
MT-14619-A-G-no-rs	14619	A	G	A	A	A	A	A	A	A	A	A	A	A	A	A	A	A	A	A	A	A	A	A	A	A	A	A	A	A	A	A	A	A	A	A	A	A	A	A	A	A	A	A	A	A	A	A	A
MT-14625-C-T-no-rs	14625	C	T	C	C	C	C	C	C	C	C	C	C	C	C	C	C	C	C	C	C	C	C	C	C	C	C	C	C	C	C	C	C	C	C	C	C	C	C	C	C	C	C	C	C	C	C	C	C
MT-14628-G-A-no-rs	14628	G	A	G	A	A	A	A	A	A	A	A	A	A	A	A	A	A	A	A	A	A	A	A	G	A	A	A	A	A	A	A	A	A	A	A	A	A	A	A	A	A	A	A	A	A	A	A	A
MT-14646-T-C-no-rs	14646	T	C	T	T	T	T	T	T	T	T	T	T	T	T	T	T	T	T	T	T	T	T	T	T	T	T	T	T	T	T	T	T	T	T	T	T	T	T	T	T	T	T	T	T	T	T	T	T
MT-14664-C-G-no-rs	14664	C	G	C	C	C	C	C	C	C	C	C	C	C	C	C	C	C	C	C	C	C	C	C	C	C	C	C	C	C	C	C	C	C	C	C	C	C	C	C	C	C	C	C	C	C	C	C	C
MT-14673-G-A-no-rs	14673	G	A	G	G	G	G	G	G	G	G	G	G	G	G	G	G	G	G	G	G	G	G	G	G	G	G	G	G	G	G	G	G	G	G	G	G	G	G	G	G	G	G	G	G	G	G	G	G
MT-14691-C-T-no-rs	14691	C	T	C	C	C	C	C	C	C	C	C	C	C	C	C	C	C	C	C	C	C	C	C	C	C	C	C	C	C	C	C	C	C	C	C	C	C	C	C	C	C	C	C	C	C	C	C	C
MT-14736-C-T-no-rs	14736	C	T	N	T	C	T	C	C	C	C	T	T	T	T	T	T	T	C	T	C	T	T	T	C	T	C	T	C	C	C	T	T	C	T	T	N	T	C	T	C	T	T	T	T	T	T	C	C
MT-14761-C-T-no-rs	14761	C	T	C	C	C	C	C	C	C	C	C	C	C	C	C	C	C	C	C	C	C	C	C	C	C	C	C	C	C	C	C	C	C	C	C	C	C	C	C	C	C	C	C	C	C	C	C	C
MT-14791-G-A-no-rs	14791	G	A	G	G	G	G	G	G	G	G	G	G	G	G	G	G	G	G	G	G	G	G	G	G	G	G	G	G	G	G	G	G	G	G	G	G	G	G	G	G	G	G	G	G	G	G	G	G
MT-14813-C-T-no-rs	14813	C	T	C	C	C	C	C	C	C	C	C	C	C	C	C	C	C	C	C	C	C	C	C	C	C	C	C	C	C	C	C	C	C	C	C	C	C	C	C	C	C	C	C	C	C	C	C	C
MT-14817-A-G-no-rs	14817	A	G	A	A	A	A	A	A	A	A	A	A	A	A	A	A	A	A	A	A	A	A	A	A	A	A	A	A	A	A	A	A	A	A	A	A	A	A	A	A	A	A	A	A	A	A	A	A
MT-14827-G-A-no-rs	14827	G	A	G	G	G	G	G	G	G	G	G	G	G	G	G	G	G	G	G	G	G	G	G	G	G	G	G	G	G	G	G	G	G	G	G	G	G	G	G	G	G	G	G	G	G	G	G	G
MT-14853-A-G-no-rs	14853	A	G	A	A	A	A	A	A	A	A	A	A	A	A	A	A	A	A	A	A	A	A	A	A	A	A	A	A	A	A	A	A	A	A	A	A	A	A	A	A	A	A	A	A	A	A	A	A
MT-14856-T-C-no-rs	14856	T	C	T	T	T	T	T	T	T	T	T	T	T	T	T	T	T	T	T	T	T	T	T	T	T	T	T	T	T	T	T	T	T	T	T	T	T	T	T	T	T	T	T	T	T	T	T	T
MT-14859-T-C-no-rs	14859	T	C	T	T	T	T	T	T	T	T	T	T	T	T	T	T	T	T	T	T	T	T	T	T	T	T	T	T	T	T	T	T	T	T	T	T	T	T	T	T	T	T	T	T	T	T	T	T
MT-14883-C-T-no-rs	14883	C	T	C	C	C	C	C	C	C	C	C	C	C	C	C	C	C	C	C	C	C	C	C	C	C	C	C	C	C	C	C	C	C	C	C	C	C	C	C	C	C	C	C	C	C	C	C	C
MT-14892-G-A-no-rs	14892	G	A	G	G	G	G	G	G	G	G	G	G	G	G	G	G	G	G	G	G	G	G	G	G	G	G	G	G	G	G	G	G	G	G	G	G	G	G	G	G	G	G	G	G	G	G	G	G
MT-14893-A-G-no-rs	14893	A	G	A	A	A	A	A	A	A	A	A	A	A	A	A	A	A	A	A	A	A	A	A	A	A	A	A	A	A	A	A	A	A	A	A	A	A	A	A	A	A	A	A	A	A	A	A	A
MT-14896-T-C-no-rs	14896	T	C	T	T	T	T	T	T	T	T	T	T	T	T	T	T	T	T	T	T	T	T	T	T	T	T	T	T	T	T	T	T	T	T	T	T	T	T	T	T	T	T	T	T	T	T	T	T
MT-14898-G-A-no-rs	14898	G	A	G	G	G	G	G	G	G	G	G	G	G	G	G	G	G	G	G	G	G	G	G	G	G	G	G	G	G	G	G	G	G	G	G	G	G	G	G	G	G	G	G	G	G	G	G	G
MT-14907-A-G-no-rs	14907	A	G	A	A	A	A	A	A	A	A	A	A	A	A	A	A	A	A	A	A	A	A	A	A	A	A	A	A	A	A	A	A	A	A	A	A	A	A	A	A	A	A	A	A	A	A	A	A
MT-14910-T-C-no-rs	14910	T	C	T	T	T	T	T	T	T	T	T	T	T	T	T	T	T	T	T	T	T	T	T	T	T	T	T	T	T	T	T	T	T	T	T	T	T	T	T	T	T	T	T	T	T	T	T	T
MT-14928-C-T-no-rs	14928	C	T	C	C	C	C	C	C	C	C	C	C	C	C	C	C	C	C	C	C	C	C	C	C	C	C	C	C	C	C	C	C	C	C	C	C	C	C	C	C	C	C	C	C	C	C	C	C
MT-14970-T-C-no-rs	14970	T	C	T	T	T	T	T	T	T	T	T	T	T	T	T	T	T	T	T	T	T	T	T	T	T	T	T	T	T	T	T	T	T	T	T	T	T	T	T	T	T	T	T	T	T	T	T	T
MT-14979-T-C-no-rs	14979	T	C	T	T	T	T	T	T	T	T	T	T	T	T	T	T	T	T	T	T	T	T	T	T	T	T	T	T	T	T	T	T	T	T	T	T	T	T	T	T	T	T	T	T	T	T	T	T
MT-14994-A-G-no-rs	14994	A	G	A	A	A	A	A	A	A	A	A	A	A	A	A	A	A	A	A	A	A	A	A	A	A	A	A	A	A	A	A	A	A	A	A	A	A	A	A	A	A	A	A	A	A	A	A	A
MT-14997-A-G-rs394028408	14997	A	G	A	A	A	A	A	A	A	A	A	A	A	A	A	A	A	A	A	A	A	A	A	A	A	A	A	A	A	A	A	A	A	A	A	A	A	A	A	A	A	A	A	A	A	A	A	A
MT-15006-C-T-no-rs	15006	C	T	C	C	C	C	C	C	C	C	C	C	C	C	C	C	C	C	C	C	C	C	C	C	C	C	C	C	C	C	C	C	C	C	C	C	C	C	C	C	C	C	C	C	C	C	C	C
MT-15012-G-A-no-rs	15012	G	A	G	G	G	G	G	G	G	G	G	G	G	G	G	G	G	G	G	G	G	G	G	G	G	G	G	G	G	G	G	G	G	G	G	G	G	G	G	G	G	G	G	G	G	G	G	G
MT-15018-C-T-no-rs	15018	C	T	C	C	C	C	C	C	C	C	C	C	C	C	C	C	C	C	C	C	C	C	C	C	C	C	C	C	C	C	C	C	C	C	C	C	C	C	C	C	C	C	C	C	C	C	C	C
MT-15036-C-T-no-rs	15036	C	T	C	C	C	C	C	C	C	C	C	C	C	C	C	C	C	C	C	C	C	C	C	C	C	C	C	C	C	C	C	C	C	C	C	C	C	C	C	C	C	C	C	C	C	C	C	C
MT-15057-C-T-no-rs	15057	C	T	C	C	C	C	C	C	C	C	C	C	C	C	C	C	C	C	C	C	C	C	C	C	C	C	C	C	C	C	C	C	C	C	C	C	C	C	C	C	C	C	C	C	C	C	C	C
MT-15069-A-T-no-rs	15069	A	T	A	A	A	A	A	A	A	A	A	A	A	A	A	A	A	A	A	A	A	A	A	A	A	A	A	A	A	A	A	A	A	A	A	A	A	A	A	A	A	A	A	A	A	A	A	A
MT-15075-C-T-no-rs	15075	C	T	C	C	C	C	C	C	C	C	C	C	C	C	C	C	C	C	C	C	C	C	C	C	C	C	C	C	C	C	C	C	C	C	C	C	C	C	C	C	C	C	C	C	C	C	C	C
MT-15078-C-T-no-rs	15078	C	T	C	C	C	C	C	C	C	C	C	C	C	C	C	C	C	C	C	C	C	C	C	C	C	C	C	C	C	C	C	C	C	C	C	C	C	C	C	C	C	C	C	C	C	C	C	C
MT-15082-C-T-no-rs	15082	C	T	C	C	C	C	C	C	C	C	C	C	C	C	C	C	C	C	C	C	C	C	C	C	C	C	C	C	C	C	C	C	C	C	C	C	C	C	C	C	C	C	C	C	C	C	C	C
MT-15084-G-A-no-rs	15084	G	A	G	G	G	G	G	G	G	G	G	G	G	G	G	G	G	G	G	G	G	G	G	G	G	G	G	G	G	G	G	G	G	G	G	G	G	G	G	G	G	G	G	G	G	G	G	G
MT-15102-C-T-no-rs	15102	C	T	C	C	C	C	C	C	C	C	C	C	C	C	C	C	C	C	C	C	C	C	C	C	C	C	C	C	C	C	C	C	C	C	C	C	C	C	C	C	C	C	C	C	C	C	C	C
MT-15114-A-G-no-rs	15114	A	G	A	A	A	A	A	A	A	A	A	A	A	A	A	A	A	A	A	A	A	A	A	A	A	A	A	A	A	A	A	A	A	A	A	A	A	A	A	A	A	A	A	A	A	A	A	A
MT-15135-A-G-no-rs	15135	A	G	A	A	A	A	A	A	A	A	A	A	A	A	A	A	A	A	A	A	A	A	A	A	A	A	A	A	A	A	A	A	A	A	A	A	A	A	A	A	A	A	A	A	A	A	A	A
MT-15141-G-A-no-rs	15141	G	A	A	G	G	G	G	G	G	G	G	G	G	G	G	G	G	G	G	G	G	G	G	G	G	G	G	G	G	G	G	G	G	G	G	G	G	G	G	G	G	G	G	G	G	G	G	G
MT-15144-T-C-no-rs	15144	T	C	T	T	T	T	T	T	T	T	T	T	T	T	T	T	T	T	T	T	T	T	T	T	T	T	T	T	T	T	T	T	T	T	T	T	T	T	T	T	T	T	T	T	T	T	T	T
MT-15147-C-T-no-rs	15147	C	T	C	C	C	C	C	C	C	C	C	C	C	C	C	C	C	C	C	C	C	C	C	C	C	C	C	C	C	C	C	C	C	C	C	C	C	C	C	C	C	C	C	C	C	C	C	C
MT-15159-A-G-no-rs	15159	A	G	A	A	A	A	A	A	A	A	A	A	A	A	A	A	A	A	A	A	A	A	A	A	A	A	A	A	A	A	A	A	A	A	A	A	A	A	A	A	A	A	A	A	A	A	A	A
MT-15173-T-C-no-rs	15173	T	C	T	T	T	T	T	T	T	T	T	T	T	T	T	T	T	T	T	T	T	T	T	T	T	T	T	T	T	T	T	T	T	T	T	T	T	T	T	T	T	T	T	T	T	T	T	T
MT-15174-G-A-no-rs	15174	G	A	G	G	G	G	G	G	G	G	G	G	G	G	G	G	G	G	G	G	G	G	G	G	G	G	G	G	G	G	G	G	G	G	G	G	G	G	G	G	G	G	G	G	G	G	G	G
MT-15201-C-T-no-rs	15201	C	T	C	C	C	C	C	C	C	C	C	C	C	C	C	C	C	C	C	C	C	C	C	C	C	C	C	C	C	C	C	C	C	C	C	C	C	C	C	C	C	C	C	C	C	C	C	C
MT-15204-C-T-no-rs	15204	C	T	C	C	T	C	T	T	T	T	C	C	C	C	C	C	C	T	C	T	C	C	C	C	C	T	C	T	T	T	C	C	T	C	C	T	C	T	C	T	C	C	C	C	C	C	T	T
MT-15207-A-C-no-rs	15207	A	C	A	A	A	A	A	A	A	A	A	A	A	A	A	A	A	A	A	A	A	A	A	A	A	A	A	A	A	A	A	A	A	A	A	A	A	A	A	A	A	A	A	A	A	A	A	A
MT-15210-G-A-no-rs	15210	G	A	G	G	G	G	G	G	G	G	G	G	G	G	G	G	G	G	G	G	G	G	G	G	G	G	G	G	G	G	G	G	G	G	G	G	G	G	G	G	G	G	G	G	G	G	G	G
MT-15229-G-A-no-rs	15229	G	A	G	G	G	G	G	G	G	G	G	G	G	G	G	G	G	G	G	G	G	G	G	G	G	G	G	G	G	G	G	G	G	G	G	G	G	G	G	G	G	G	G	G	G	G	G	G
MT-15249-C-T-no-rs	15249	C	T	C	C	C	C	C	C	C	C	C	C	C	C	C	C	C	C	C	C	C	C	C	C	C	C	C	C	C	C	C	C	C	C	C	C	C	C	C	C	C	C	C	C	C	C	C	C
MT-15252-A-T-no-rs	15252	A	T	A	A	A	A	A	A	A	A	A	A	A	A	A	A	A	A	A	A	A	A	A	A	A	A	A	A	A	A	A	A	A	A	A	A	A	A	A	A	A	A	A	A	A	A	A	A
MT-15279-T-C-no-rs	15279	T	C	T	T	T	T	T	T	T	T	T	T	T	T	T	T	T	T	T	T	T	T	T	T	T	T	T	T	T	T	T	T	T	T	T	T	T	T	T	T	T	T	T	T	T	T	T	T
MT-15282-T-C-no-rs	15282	T	C	T	T	T	T	T	T	T	T	T	T	T	T	T	T	T	T	T	T	T	T	T	T	T	T	T	T	T	T	T	T	T	T	T	T	T	T	T	T	T	T	T	T	T	T	T	T
MT-15312-T-C-no-rs	15312	T	C	T	T	T	T	T	T	T	T	T	T	T	T	T	T	T	T	T	T	T	T	T	T	T	T	T	T	T	T	T	T	T	T	T	T	T	T	T	T	T	T	T	T	T	T	T	T
MT-15315-T-C-rs395056337	15315	T	C	T	T	T	T	T	T	T	T	T	T	T	T	T	T	T	T	T	T	T	T	T	T	T	T	T	T	T	T	T	T	T	T	T	T	T	T	T	T	T	T	T	T	T	T	T	T
MT-15321-A-G-no-rs	15321	A	G	A	A	A	A	A	A	A	A	A	A	A	A	A	A	A	A	A	A	A	A	A	A	A	A	A	A	A	A	A	A	A	A	A	A	A	A	A	A	A	A	A	A	A	A	A	A
MT-15344-G-A-no-rs	15344	G	A	G	G	A	G	A	A	A	A	G	G	G	G	G	G	G	A	G	A	G	G	G	G	G	A	G	A	A	A	G	G	A	G	G	A	G	A	G	A	G	G	G	G	G	G	A	A
MT-15391-T-C-no-rs	15391	T	C	T	T	T	T	T	T	T	T	T	T	T	T	T	T	T	T	T	T	T	T	T	T	T	T	T	T	T	T	T	T	T	T	T	T	T	T	T	T	T	T	T	T	T	T	T	T
MT-15490-C-T-no-rs	15490	C	T	C	C	C	C	C	C	C	C	C	C	C	C	C	C	C	C	C	C	C	C	C	C	C	C	C	C	C	C	C	C	C	C	C	C	C	C	C	C	C	C	C	C	C	C	C	C
MT-15495-T-C-rs393902574	15495	T	C	C	C	C	C	C	C	C	C	C	C	C	C	C	C	C	C	C	C	C	C	C	C	C	C	C	C	C	C	C	C	C	C	C	C	C	C	C	C	C	C	C	C	C	C	C	C
MT-15496-A-G-rs395752364	15496	A	G	A	A	A	A	A	A	A	A	A	A	A	A	A	A	A	A	A	A	A	A	A	A	A	A	A	A	A	A	A	A	A	A	A	A	A	A	A	A	A	A	A	A	A	A	A	A
MT-15521-G-A-no-rs	15521	G	A	G	G	G	G	G	G	G	G	G	G	G	G	G	G	G	G	G	G	G	G	G	G	G	G	G	G	G	G	G	G	G	G	G	G	G	G	G	G	G	G	G	G	G	G	G	G
MT-15526-T-C-no-rs	15526	T	C	T	T	T	T	T	T	T	T	T	T	T	T	T	T	T	T	T	T	T	T	T	T	T	T	T	T	T	T	T	T	T	T	T	T	T	T	T	T	T	T	T	T	T	T	T	T
MT-15534-C-T-rs397079674	15534	C	T	C	C	C	C	C	C	C	C	C	C	C	C	C	C	C	C	C	C	C	C	C	C	C	C	C	C	C	C	C	C	C	C	C	C	C	C	C	C	C	C	C	C	C	C	C	C
MT-15536-T-C-no-rs	15536	T	C	T	T	T	T	T	T	T	T	T	T	T	T	T	T	T	T	T	T	T	T	T	T	T	T	T	T	T	T	T	T	T	T	T	T	T	T	T	T	T	T	T	T	T	T	T	T
MT-15538-A-G-rs869311984	15538	A	G	A	A	A	A	A	A	A	A	A	A	A	A	A	A	A	A	A	A	A	A	A	A	A	A	A	A	A	A	A	A	A	A	A	A	A	A	A	A	A	A	A	A	A	A	A	A
MT-15540-A-G-no-rs	15540	A	G	A	A	A	A	A	A	A	A	A	A	A	A	A	A	A	A	A	A	A	A	A	A	A	A	A	A	A	A	A	A	A	A	A	A	A	A	A	A	A	A	A	A	A	A	A	A
MT-15569-T-C-no-rs	15569	T	C	T	T	T	T	T	T	T	T	T	T	T	T	T	T	T	T	T	T	T	T	T	T	T	T	T	T	T	T	T	T	T	T	T	T	T	T	T	T	T	T	T	T	T	T	T	T
MT-15595-A-G-no-rs	15595	A	G	A	A	A	A	A	A	A	A	A	A	A	A	A	A	A	A	A	A	A	A	A	A	A	A	A	A	A	A	A	A	A	A	A	A	A	A	A	A	A	A	A	A	A	A	A	A
MT-15596-A-G-rs869311987	15596	A	G	A	A	A	A	A	A	A	A	A	A	A	A	A	A	A	A	A	A	A	A	A	A	A	A	A	A	A	A	A	A	A	A	A	A	A	A	A	A	A	A	A	A	A	A	A	A
MT-15600-G-A-no-rs	15600	G	A	G	G	G	G	G	G	G	G	G	G	G	G	G	G	G	G	G	G	G	G	G	G	G	G	G	G	G	G	G	G	G	G	G	G	G	G	G	G	G	G	G	G	G	G	G	G
MT-15601-T-C-no-rs	15601	T	C	T	T	T	T	T	T	T	T	T	T	T	T	T	T	T	T	T	T	T	T	T	T	T	T	T	T	T	T	T	T	T	T	T	T	T	T	T	T	T	T	T	T	T	T	T	T
MT-15617-T-C-no-rs	15617	T	C	T	T	T	T	T	T	T	T	T	T	T	T	T	T	T	T	T	T	T	T	T	T	T	T	T	T	T	T	T	T	T	T	T	T	T	T	T	T	T	T	T	T	T	T	T	T
MT-15651-G-A-no-rs	15651	G	A	G	G	G	G	G	G	G	G	G	G	G	G	G	G	G	G	G	G	G	G	G	G	G	G	G	G	G	G	G	G	G	G	G	G	G	G	G	G	G	G	G	G	G	G	G	G
MT-15657-T-C-no-rs	15657	T	C	T	T	T	T	T	T	T	T	T	T	T	T	T	T	T	T	T	T	T	T	T	T	T	T	T	T	T	T	T	T	T	T	T	T	T	T	T	T	T	T	T	T	T	T	T	T
MT-15659-T-C-no-rs	15659	T	C	T	T	T	T	T	T	T	T	T	T	T	T	T	T	T	T	T	T	T	T	T	T	T	T	T	T	T	T	T	T	T	T	T	T	T	T	T	T	T	T	T	T	T	T	T	T
MT-15667-A-G-no-rs	15667	A	G	A	A	A	A	A	A	A	A	A	A	A	A	A	A	A	A	A	A	A	A	A	A	A	A	A	A	A	A	A	A	A	A	A	A	A	A	A	A	A	A	A	A	A	A	A	A
MT-15672-G-A-no-rs	15672	G	A	G	G	G	G	G	G	G	G	G	G	G	G	G	G	G	G	G	G	G	G	G	G	G	G	G	G	G	G	G	G	G	G	G	G	G	G	G	G	G	G	G	G	G	G	G	G
MT-15686-A-G-no-rs	15686	A	G	A	A	A	A	A	A	A	A	A	A	A	A	A	A	A	A	A	A	A	A	A	A	A	A	A	A	A	A	A	A	A	A	A	A	A	A	A	A	A	A	A	A	A	A	A	A
MT-15695-A-G-no-rs	15695	A	G	A	A	A	A	A	A	A	A	A	A	A	A	A	A	A	A	A	A	A	A	A	A	A	A	A	A	A	A	A	A	A	A	A	A	A	A	A	A	A	A	A	A	A	A	A	A
MT-15703-T-C-no-rs	15703	T	C	T	C	C	C	C	C	C	C	C	C	C	C	C	C	C	C	C	C	C	C	C	T	C	C	C	C	C	C	C	C	C	C	C	C	C	C	C	C	C	C	C	C	C	C	C	C
MT-15709-C-T-rs869311991	15709	C	T	C	C	C	C	C	C	C	C	C	C	C	C	C	C	C	C	C	C	C	C	C	C	C	C	C	C	C	C	C	C	C	C	C	C	C	C	C	C	C	C	C	C	C	C	C	C
MT-15718-C-T-no-rs	15718	C	T	C	C	C	C	C	C	C	C	C	C	C	C	C	C	C	C	C	C	C	C	C	C	C	C	C	C	C	C	C	C	C	C	C	C	C	C	C	C	C	C	C	C	C	C	C	C
MT-15726-G-A-no-rs	15726	G	A	G	G	G	G	G	G	G	G	G	G	G	G	G	G	G	G	G	G	G	G	G	G	G	G	G	G	G	G	G	G	G	G	G	G	G	G	G	G	G	G	G	G	G	G	G	G
MT-15737-T-C-no-rs	15737	T	C	T	T	T	T	T	T	T	T	T	T	T	T	T	T	T	T	T	T	T	T	T	T	T	T	T	T	T	T	T	T	T	T	T	T	T	T	T	T	T	T	T	T	T	T	T	T
MT-15740-A-G-no-rs	15740	A	G	A	A	A	A	A	A	A	A	A	A	A	A	A	A	A	A	A	A	A	A	A	A	A	A	A	A	A	A	A	A	A	A	A	A	A	A	A	A	A	A	A	A	A	A	A	A
MT-15771-C-T-rs395526001	15771	C	T	C	C	T	C	T	T	T	T	C	C	C	C	C	C	C	T	C	T	C	C	C	C	C	T	C	T	T	T	C	C	T	C	C	T	C	T	C	T	C	C	C	C	C	C	T	T
MT-15773-A-G-no-rs	15773	A	G	A	A	A	A	A	A	A	A	A	A	A	A	A	A	A	A	A	A	A	A	A	A	A	A	A	A	A	A	A	A	A	A	A	A	A	A	A	A	A	A	A	A	A	A	A	A
MT-15775-C-T-no-rs	15775	C	T	C	C	C	C	C	C	C	C	C	C	C	C	C	C	C	C	C	C	C	C	C	C	C	C	C	C	C	C	C	C	C	C	C	C	C	C	C	C	C	C	C	C	C	C	C	C
MT-15777-A-G-no-rs	15777	A	G	A	A	G	A	G	G	G	G	A	A	A	A	A	A	A	G	A	G	A	A	A	A	A	G	A	G	G	G	A	A	G	A	A	N	A	G	A	G	A	A	A	A	A	A	G	G
MT-15806-C-T-no-rs	15806	C	T	C	C	C	C	C	C	C	C	C	C	C	C	C	C	C	C	C	C	C	C	C	C	C	C	C	C	C	C	C	C	C	C	C	C	C	C	C	C	C	C	C	C	C	C	C	C
MT-15807-C-T-no-rs	15807	C	T	C	C	C	C	C	C	C	C	C	C	C	C	C	C	C	C	C	C	C	C	C	C	C	C	C	C	C	C	C	C	C	C	C	C	C	C	C	C	C	C	C	C	C	C	C	C
MT-15872-A-G-no-rs	15872	A	G	A	A	A	A	A	A	A	A	A	A	A	A	A	A	A	A	A	A	A	A	A	A	A	A	A	A	A	A	A	A	A	A	A	A	A	A	A	A	A	A	A	A	A	A	A	A
MT-15890-T-G-no-rs	15890	T	G	T	T	T	T	T	T	T	T	T	T	T	T	T	T	T	T	T	T	T	T	T	T	T	T	T	T	T	T	T	T	T	T	T	T	T	T	T	T	T	T	T	T	T	T	T	T
MT-15974-C-T-rs397425342	15974	C	T	C	C	C	C	C	C	C	C	C	C	C	C	C	C	C	C	C	C	C	C	C	T	C	C	C	C	C	C	C	C	C	C	C	C	C	C	C	C	C	C	C	C	C	C	C	C
MT-15984-T-C-no-rs	15984	T	C	T	T	T	T	T	T	T	T	T	T	T	T	T	T	T	T	T	T	T	T	T	T	T	T	T	T	T	T	T	T	T	T	T	T	T	T	T	T	T	T	T	T	T	T	T	T
MT-15995-A-G-no-rs	15995	A	G	A	A	A	A	A	A	A	A	A	A	A	A	A	A	A	A	A	A	A	A	A	A	A	A	A	A	A	A	A	A	A	A	A	A	A	A	A	A	A	A	A	A	A	A	A	A
MT-16007-T-C-no-rs	16007	T	C	T	T	T	T	T	T	T	T	T	T	T	T	T	T	T	T	T	T	T	T	T	T	T	T	T	T	T	T	T	T	T	T	T	T	T	T	T	T	T	T	T	T	T	T	T	T
MT-16031-T-C-no-rs	16031	T	C	T	C	T	C	T	T	T	T	C	C	C	C	C	C	C	T	C	T	C	C	C	T	C	T	C	T	T	T	C	C	T	C	C	T	C	T	C	T	C	C	C	C	C	C	T	T
MT-16038-A-G-no-rs	16038	A	G	A	A	G	A	G	G	G	G	A	A	A	A	A	A	A	G	A	G	A	A	A	A	A	G	A	G	G	G	A	A	G	A	A	G	A	G	A	G	A	A	A	A	A	A	G	G
MT-16055-A-G-rs869311994	16055	A	G	A	A	A	A	A	A	A	A	A	A	A	A	A	A	A	A	A	A	A	A	A	G	A	A	A	A	A	A	A	A	A	A	A	A	A	A	A	A	A	A	A	A	A	A	A	A
MT-16068-T-C-rs394992198	16068	T	C	T	T	T	T	T	T	T	T	T	T	T	T	T	T	T	T	T	T	T	T	T	T	T	T	T	T	T	T	T	T	T	T	T	T	T	T	T	T	T	T	T	T	T	T	T	T
MT-16074-G-A-no-rs	16074	G	A	G	G	G	G	G	G	G	G	G	G	G	G	G	G	G	G	G	G	G	G	G	G	G	G	G	G	G	G	G	G	G	G	G	G	G	G	G	G	G	G	G	G	G	G	G	G
MT-16112-C-T-no-rs	16112	C	T	C	C	C	C	C	C	C	C	C	C	C	C	C	C	C	C	C	C	C	C	C	C	C	C	C	C	C	C	C	C	C	C	C	C	C	C	C	C	C	C	C	C	C	C	C	C
MT-16116-A-G-no-rs	16116	A	G	A	A	A	A	A	A	A	A	A	A	A	A	A	A	A	A	A	A	A	A	A	A	A	A	A	A	A	A	A	A	A	A	A	A	A	A	A	A	A	A	A	A	A	A	A	A
MT-16130-T-C-no-rs	16130	T	C	T	C	C	C	C	C	C	C	C	C	C	C	C	C	C	C	C	C	C	C	C	T	C	C	C	C	C	C	C	C	C	C	C	C	C	C	C	C	C	C	C	C	C	C	C	C
MT-16145-G-A-no-rs	16145	G	A	G	G	G	G	G	G	G	G	G	G	G	G	G	G	G	G	G	G	G	G	G	G	G	G	G	G	G	G	G	G	G	G	G	G	G	G	G	G	G	G	G	G	G	G	G	G
MT-16161-G-A-no-rs	16161	G	A	G	G	G	G	G	G	G	G	G	G	G	G	G	G	G	G	G	G	G	G	G	G	G	G	G	G	G	G	G	G	G	G	G	G	G	G	G	G	G	G	G	G	G	G	G	G
MT-16305-G-A-rs396986848	16305	G	A	G	G	G	G	G	G	G	G	G	G	G	G	G	G	G	G	G	G	G	G	G	G	G	G	G	G	G	G	G	G	G	G	G	G	G	G	G	G	G	G	G	G	G	G	G	G
MT-16313-G-A-rs394916921	16313	G	A	G	G	G	G	G	G	G	G	G	G	G	G	G	G	G	G	G	G	G	G	G	G	G	G	G	G	G	G	G	G	G	G	G	G	G	G	G	G	G	G	G	G	G	G	G	G
MT-16329-G-A-no-rs	16329	G	A	G	G	G	G	G	G	G	G	G	G	G	G	G	G	G	G	G	G	G	G	G	G	G	G	G	G	G	G	G	G	G	G	G	G	G	G	G	G	G	G	G	G	G	G	G	G
MT-16385-A-G-rs869311998	16385	A	G	A	A	A	A	A	A	A	A	A	A	A	A	A	A	A	A	A	A	A	A	A	A	A	A	A	A	A	A	A	A	A	A	A	A	A	A	A	A	A	A	A	A	A	A	A	A
MT-16394-A-G-no-rs	16394	A	G	A	A	A	A	A	A	A	A	A	A	A	A	A	A	A	A	A	A	A	A	A	A	A	A	A	A	A	A	A	A	A	A	A	A	A	A	A	A	A	A	A	A	A	A	A	A
MT-16439-C-T-rs869311999	16439	C	T	C	C	C	C	C	C	C	C	C	C	C	C	C	C	C	C	C	C	C	C	C	C	C	C	C	C	C	C	C	C	C	C	C	C	C	C	C	C	C	C	C	C	C	C	C	C
MT-16476-C-T-rs869312000	16476	C	T	C	C	C	C	C	C	C	C	C	C	C	C	C	C	C	C	C	C	C	C	C	C	C	C	C	C	C	C	C	C	C	C	C	C	C	C	C	C	C	C	C	C	C	C	C	C
MT-16514-C-T-no-rs	16514	C	T	C	C	C	C	C	C	C	C	C	C	C	C	C	C	C	C	C	C	C	C	C	C	C	C	C	C	C	C	C	C	C	C	C	C	C	C	C	C	C	C	C	C	C	C	C	C
MT-16579-A-G-no-rs	16579	A	G	A	A	A	A	A	A	A	A	A	A	A	A	A	A	A	A	A	A	A	A	A	A	A	A	A	A	A	A	A	A	A	A	A	A	A	A	A	A	A	A	A	A	A	A	A	A
MT-16614-C-T-no-rs	16614	C	T	C	C	C	C	C	C	C	C	C	C	C	C	C	C	C	C	C	C	C	C	C	C	C	C	C	C	C	C	C	C	C	C	C	C	C	C	C	C	C	C	C	C	C	C	C	C
MT-16644-T-C-no-rs	16644	T	C	T	T	T	T	T	T	T	T	T	T	T	T	T	T	T	T	T	T	T	T	T	T	T	T	T	T	T	T	T	T	T	T	T	T	T	T	T	T	T	T	T	T	T	T	T	T
[truncated: 129 more columns]

## Sheet: S4_mtDNA_HGs
Table S4: mtDNA HG affiliation in KHs (n=93) and global modern horse dataset (n=81) [20]
Sample ID	Haplogroup	Population (KHs)/ Breeds	Region	Aceesion Numbers
AN_001_2	A	Kaimanawa Horse	New Zealand	-
BR_003_2	G	Kaimanawa Horse	New Zealand	-
MI_004_2	P	Kaimanawa Horse	New Zealand	-
SG_005_2	G	Kaimanawa Horse	New Zealand	-
BO_006_2	P	Kaimanawa Horse	New Zealand	-
BE_012_2	P	Kaimanawa Horse	New Zealand	-
SP_013_2	P	Kaimanawa Horse	New Zealand	-
FE_035_2	P	Kaimanawa Horse	New Zealand	-
SA_039_2	G	Kaimanawa Horse	New Zealand	-
SU_040_2	G	Kaimanawa Horse	New Zealand	-
AB_043_2	G	Kaimanawa Horse	New Zealand	-
SM_045_2	G	Kaimanawa Horse	New Zealand	-
KA_047_2	G	Kaimanawa Horse	New Zealand	-
AU_049_2	G	Kaimanawa Horse	New Zealand	-
RO_051_2	G	Kaimanawa Horse	New Zealand	-
BE_053_2	P	Kaimanawa Horse	New Zealand	-
CA_054_2	G	Kaimanawa Horse	New Zealand	-
AN_055_2	P	Kaimanawa Horse	New Zealand	-
PH_056_2	G	Kaimanawa Horse	New Zealand	-
FI_062_2	G	Kaimanawa Horse	New Zealand	-
KA_063_2	G	Kaimanawa Horse	New Zealand	-
KI_065_2	B	Kaimanawa Horse	New Zealand	-
TR_066_2	G	Kaimanawa Horse	New Zealand	-
QU_067_2	P	Kaimanawa Horse	New Zealand	-
PR_068_2	G	Kaimanawa Horse	New Zealand	-
MS_069_2	P	Kaimanawa Horse	New Zealand	-
KH_070_2	P	Kaimanawa Horse	New Zealand	-
GI_074_2	P	Kaimanawa Horse	New Zealand	-
LI_075_2	G	Kaimanawa Horse	New Zealand	-
LI_077_2	G	Kaimanawa Horse	New Zealand	-
EL_078_2	P	Kaimanawa Horse	New Zealand	-
FO_082_2	G	Kaimanawa Horse	New Zealand	-
BU_083_2	G	Kaimanawa Horse	New Zealand	-
RA_085_2	P	Kaimanawa Horse	New Zealand	-
BL_086_2	G	Kaimanawa Horse	New Zealand	-
DR_087_2	P	Kaimanawa Horse	New Zealand	-
MA_090_2	G	Kaimanawa Horse	New Zealand	-
GU_091_2	P	Kaimanawa Horse	New Zealand	-
GY_094_2	G	Kaimanawa Horse	New Zealand	-
SH_096_2	G	Kaimanawa Horse	New Zealand	-
CI_098_2	G	Kaimanawa Horse	New Zealand	-
EI_099_2	G	Kaimanawa Horse	New Zealand	-
NG_103_2	G	Kaimanawa Horse	New Zealand	-
LU_104_2	G	Kaimanawa Horse	New Zealand	-
MI_106_2	P	Kaimanawa Horse	New Zealand	-
PI_108_2	P	Kaimanawa Horse	New Zealand	-
LP_109_2	G	Kaimanawa Horse	New Zealand	-
TA_002_1	A	Kaimanawa Horse	New Zealand	-
PO_007_1	G	Kaimanawa Horse	New Zealand	-
BH_008_1	P	Kaimanawa Horse	New Zealand	-
CH_009_1	P	Kaimanawa Horse	New Zealand	-
AR_010_1	G	Kaimanawa Horse	New Zealand	-
TE_011_1	G	Kaimanawa Horse	New Zealand	-
TB_014_1	G	Kaimanawa Horse	New Zealand	-
CA_015_1	G	Kaimanawa Horse	New Zealand	-
KO_017_1	P	Kaimanawa Horse	New Zealand	-
EL_030_1	P	Kaimanawa Horse	New Zealand	-
CA_031_1	P	Kaimanawa Horse	New Zealand	-
PA_032_1	P	Kaimanawa Horse	New Zealand	-
AL_033_1	G	Kaimanawa Horse	New Zealand	-
MU_034_1	G	Kaimanawa Horse	New Zealand	-
DE_036_1	P	Kaimanawa Horse	New Zealand	-
TB_037_1	P	Kaimanawa Horse	New Zealand	-
KO_038_1	G	Kaimanawa Horse	New Zealand	-
FL_041_1	G	Kaimanawa Horse	New Zealand	-
GA_042_1	G	Kaimanawa Horse	New Zealand	-
SH_044_1	L	Kaimanawa Horse	New Zealand	-
ZO_046_1	G	Kaimanawa Horse	New Zealand	-
LE_050_1	G	Kaimanawa Horse	New Zealand	-
BE_052_1	P	Kaimanawa Horse	New Zealand	-
NU_057_1	G	Kaimanawa Horse	New Zealand	-
RA_059_1	G	Kaimanawa Horse	New Zealand	-
HE_061_1	G	Kaimanawa Horse	New Zealand	-
CR_064_1	P	Kaimanawa Horse	New Zealand	-
PH_072_1	N	Kaimanawa Horse	New Zealand	-
RO_073_1	G	Kaimanawa Horse	New Zealand	-
EC_076_1	G	Kaimanawa Horse	New Zealand	-
ST_079_1	G	Kaimanawa Horse	New Zealand	-
SE_080_1	G	Kaimanawa Horse	New Zealand	-
CO_081_1	G	Kaimanawa Horse	New Zealand	-
DD_088_1	P	Kaimanawa Horse	New Zealand	-
GA_093_1	G	Kaimanawa Horse	New Zealand	-
BR_097_1	G	Kaimanawa Horse	New Zealand	-
AR_100_1	G	Kaimanawa Horse	New Zealand	-
BE_101_1	P	Kaimanawa Horse	New Zealand	-
RO_102_1	G	Kaimanawa Horse	New Zealand	-
BR_107_1	G	Kaimanawa Horse	New Zealand	-
BR_110_1	P	Kaimanawa Horse	New Zealand	-
DC1000263	G	Kaimanawa Horse	New Zealand	-
DC1000267	G	Kaimanawa Horse	New Zealand	-
KY_112_2	P	Kaimanawa Horse	New Zealand	-
CI_113_2	G	Kaimanawa Horse	New Zealand	-
PE_114_2	G	Kaimanawa Horse	New Zealand	-
1_ChP01_JN398377.2	A	Chincoteague Pony	America North	JN398377
2_CsP01_JN398378.1	A	Caspian Pony	Middle East	JN398378
3_Mrm12_JN398379.1	A	Maremmano	Europe South	JN398379
4_Arb05_JN398380.1	A	Arabian	Middle East	JN398380
5_Mrm11_JN398381.1	A	Maremmano	Europe South	JN398381
6_Mrm07_JN398382.1	A	Maremmano	Europe South	JN398382
7_Irn14_JN398383.1	A	Unspecified Iranian Breed	Middle East	JN398383
8_Syr02_JN398384.1	A	Unspecified Syrian Breed	Middle East	JN398384
9_AkT10_JN398385.1	A	Akhal-Teke	Asia Centre	JN398385
10_WeP01_JN398386.1	B	Westphalian	Europe Centre	JN398386
11_Mrm14_JN398387.1	B	Maremmano	Europe South	JN398387
12_Mrm08_JN398388.1	B	Maremmano	Europe South	JN398388
13_Syr05_JN398389.1	B	Unspecified Syrian Breed	Middle East	JN398389
14_Ita01_JN398390.1	B	Unspecified Italian Breed	Europe South	JN398390
15_Syr04_JN398391.1	B	Unspecified Syrian Breed	Middle East	JN398391
16_Arb02_JN398392.1	C	Arabian	Middle East	JN398392
17_AkT11_JN398393.1	C	Akhal-Teke	Asia Centre	JN398393
18_Syr01_JN398394.1	C	Unspecified Syrian Breed	Middle East	JN398394
19_Irn09_JN398395.1	C	Unspecified Iranian Breed	Middle East	JN398395
20_SfP01_JN398396.1	C	Suffolk Punch	Europe North	JN398396
21_Mrm13_JN398397.1	C	Maremmano	Europe South	JN398397
22_NoF01_JN398398.1	D	Norwegian Fjord	Europe North	JN398398
23_ILH02_JN398399.1	D	Icelandic Horse	Europe North	JN398399
24_ILH01_JN398400.1	D	Icelandic Horse	Europe North	JN398400
25_Mrm05_JN398401.1	E	Maremmano	Europe South	JN398401
26_Prz01_JN398402.1	F	Przewalskii	Asia Centre	JN398402
27_Prz02_JN398403.1	F	Przewalskii	Asia Centre	JN398403
28_AkT06_JN398404.1	G	Akhal-Teke	Asia Centre	JN398404
30_Irn05_JN398405.1	G	Unspecified Iranian Breed	Middle East	JN398405
31_Arb03_JN398406.1	G	Arabian	Middle East	JN398406
32_Gia02_JN398407.1	G	Giara Horse (Sardinia)	Europe South	JN398407
33_Syr03_JN398408.1	G	Unspecified Syrian Breed	Middle East	JN398408
34_Ita02_JN398409.1	G	Unspecified Italian Breed	Europe South	JN398409
35_AkT07_JN398410.1	G	Akhal-Teke	Asia Centre	JN398410
36_Gia01_JN398411.1	G	Giara Horse (Sardinia)	Europe South	JN398411
37_Arb06_JN398412.1	G	Arabian	Middle East	JN398412
38_Mrm06_JN398413.1	H	Maremmano	Europe South	JN398413
39_Irn11_JN398414.1	I	Unspecified Iranian Breed	Middle East	JN398414
40_Irn10_JN398415.1	I	Unspecified Iranian Breed	Middle East	JN398415
41_CsP04_JN398416.1	I	Caspian Pony	Middle East	JN398416
42_Trk01_JN398417.1	I	Trakhener	Europe North	JN398417
43_Mrm15_JN398418.1	J	Maremmano	Europe South	JN398418
44_Irn02_JN398419.1	J	Unspecified Iranian Breed	Middle East	JN398419
45_Bel01_JN398420.1	K	Belgian Draft	Europe Centre	JN398420
46_APH01_JN398421.1	L	American Paint Horse	America North	JN398421
47_AkT09_JN398422.1	L	Akhal-Teke	Asia Centre	JN398422
48_Irn01_JN398423.1	L	Unspecified Iranian Breed	Middle East	JN398423
49_AkT08_JN398424.1	L	Akhal-Teke	Asia Centre	JN398424
50_Ita03_JN398425.1	L	Unspecified Italian Breed	Europe South	JN398425
51_Mrm10_JN398426.1	L	Maremmano	Europe South	JN398426
52_Mrm03_JN398427.1	L	Maremmano	Europe South	JN398427
53_CsP02_JN398428.1	L	Caspian Pony	Middle East	JN398428
54_Old01_JN398429.1	L	Oldenburg	Europe North	JN398429
55_And01_JN398430.1	L	Andalusian	Europe South	JN398430
56_Sil01_JN398431.1	L	Silesian	Europe Centre	JN398431
57_Mrm04_JN398432.1	L	Maremmano	Europe South	JN398432
58_Irn13_JN398433.1	L	Unspecified Iranian Breed	Middle East	JN398433
59_Arb04_JN398434.1	L	Arabian	Middle East	JN398434
60_AkT05_JN398435.1	M	Akhal-Teke	Asia Centre	JN398435
61_CsP05_JN398436.1	M	Caspian Pony	Middle East	JN398436
62_Mrm01_JN398437.1	M	Maremmano	Europe South	JN398437
63_Fre01_JN398438.1	M	Friesian	Europe Centre	JN398438
64_Cly01_JN398439.1	M	Clydesdale	Europe North	JN398439
65_EnS01_JN398440.1	N	English Shire	Europe North	JN398440
66_Sad01_JN398441.1	N	Saddlebred	America North	JN398441
67_Exm01_JN398442.1	N	Exmoor Pony	Europe North	JN398442
68_And02_JN398443.1	N	Andalusian	Europe South	JN398443
69_Irn06_JN398444.1	N	Unspecified Iranian Breed	Middle East	JN398444
70_Irn12_JN398445.1	O	Unspecified Iranian Breed	Middle East	JN398445
71_Irn03_JN398446.1	P	Unspecified Iranian Breed	Middle East	JN398446
72_CsP03_JN398447.1	P	Caspian Pony	Middle East	JN398447
73_Arb01_JN398448.1	P	Arabian	Middle East	JN398448
74_AkT02_JN398449.1	Q	Akhal-Teke	Asia Centre	JN398449
75_AkT01_JN398450.1	Q	Akhal-Teke	Asia Centre	JN398450
76_Irn07_JN398451.1	Q	Unspecified Iranian Breed	Middle East	JN398451
77_AkT04_JN398452.1	Q	Akhal-Teke	Asia Centre	JN398452
78_AkT03_JN398453.1	Q	Akhal-Teke	Asia Centre	JN398453
80_Mrm02_JN398454.1	Q	Maremmano	Europe South	JN398454
81_Irn08_JN398455.1	Q	Unspecified Iranian Breed	Middle East	JN398455
82_Mrm09_JN398456.1	R	Maremmano	Europe South	JN398456
83_Irn04_JN398457.1	R	Unspecified Iranian Breed	Middle East	JN398457

## Sheet: S5_d_loop_Diversity_Paramters
Table S5: Partial mtDNA D-loop (255-bp) genetic diversity in KHs compared with other feral horse populations. N: number of samples; S: number of polymorphic (segregating) sites; h: number of haplotypes; Hd: haplotype diversity; k: average number of nucleotide differences; π: nucleotide diversity; θW: theta estimator based on the segregating sites; SD: standard deviation values; Significance: **P-…
Population	Study	N	S	h	k	Hd (SD)	π (SD)	θW (SD)
Feral Horses
KH	This study	71	4	4	0.192	0.110 (0.051)	0.00687 (0.00355)	0.02956 (0.01616)
Assateague	[30]	3	4	3	2.667	1.0 (0.272)	0.09524 (0.02749)	0.09524 (0.06854)
Mustang	[32]	77	9	8	1.441	0.612 (0.049)	0.05146 (0.00465)	0.0654 (0.02676)
Florida Cracker	[31]	3	2	2	1.333	0.667 (0.314)	0.04762 (0.02245)	0.04762 (0.03923)
Sulphur Mustang	[31]	6	0	1	-	-	-	-
Kiger Mustang	[31]	6	3	3	1.267	0.733 (0.155)	0.04524 (0.01634)	0.04692 (0.03249)
Spanish Mustang	[31]	4	4	2	2	0.50 (0.265)	0.07143 (0.03788)	0.07792 (0.0532)
Mustangs_combined	[31,32]	93	10	10	1.461	0.611 (0.047)	0.05218 (0.0444)	0.06997 (0.02738)
Theodore National Park	[10]	3	2	2	1.333	0.667 (0.314)	0.04762 (0.02245)	0.04762 (0.03923)
Sable Island	[12]	21	1	2	0.095	0.095 (0.084)	0.0034 (0.00301)	0.00993 (0.00993)
Saint-Pierre et Miquleon	[12]	11	10	5	3.527	0.782 (0.093)	0.12597 (0.01716)	0.12193 (0.05945)
Grand Turk	[12]	11	2	2	0.364	0.182 (0.144)	0.01299 (0.01026)	0.02439 (0.01852)
Total_Feral Horses		216	16	15	1.783	0.714 (0.017)	0.06367 (0.00247)	0.09604 (0.03097)
Domestic horses
Global Domestic Horses (Achilli)	[20]	81	23	21	2.286	0.89 (0.02)	0.08166 (0.00586)	0.16543 (0.05306)

## Sheet: S6_Y-chr_data
Table S6: Information on 157 MSY variants genotyped in male KHs (n=43), using Equine GGP array and KASP genotyping techniques and retrieved from global modern horse dataset (n=157) [34]
Note: The orange color indicates the bases imputed using the information from other samples in the same haplogroup
Variant Details											Kaimanawa Male Horses
SNP Name	Position	Variant Type	Ancestral Allele	Derived Allele	Method	Single base REF	Single base ALT	Major Group	Derived allele in haplogroup/type	Needed Strand Correction	TA_002_1	AR_010_1	TE_011_1	CA_015_1	PA_032_1	MU_034_1	TB_037_1	KO_038_1	FL_041_1	ZO_046_1	LE_050_1	BE_052_1	RA_059_1	HE_061_1	CR_064_1	RO_073_1	EC_076_1	ST_079_1	SE_080_1	GA_093_1	BR_097_1	RO_102_1	BR_107_1	DC1000267	BR_110_1	PO_007_1	BH_008_1	EL_030_1	CA_031_1	DE_036_1	BE_101_1	CH_009_1	NU_057_1	GA_042_1	AL_033_1	KO_017_1	TB_014_1	AR_100_1	CO_081_1
fAAV	LipY764_contig14:3071	SNV	T	C	Illumina Array	T	C	Crown	A	Yes	C	C	C	C	C	C	C	C	C	C	C	C	C	C	C	C	C	C	C	C	C	C	C	C	C	C	C	C	C	C	C	C	T	T	T	T	T	T	T
rW	LipY764_contig79:13451	SNV	G	A	Illumina Array	G	A	Crown	A	No	A	A	A	A	A	A	A	A	A	A	A	A	A	A	A	A	A	A	A	A	A	A	A	A	A	A	A	A	A	A	A	A	G	G	G	G	G	G	G
fUV	LipY764_contig110:2533	SNV	A	G	Illumina Array	A	G	Crown	Ad-h	No	A	A	A	A	A	A	A	A	A	A	A	A	A	A	A	A	A	A	A	A	A	A	A	A	A	A	A	A	A	A	A	A	A	A	A	A	A	A	A
fUU	LipY764_contig110:834	SNV	T	G	Illumina Array	T	G	Crown	Ad-h	Yes	T	T	T	T	T	T	T	T	T	T	T	T	T	T	T	T	T	T	T	T	T	T	T	T	T	T	T	T	T	T	T	T	T	T	T	T	T	T	T
rAG	LipY764_contig150:8337	SNV	A	G	Illumina Array	A	G	Crown	Ad-h	No	A	A	A	A	A	A	A	A	A	A	A	A	A	A	A	A	A	A	A	A	A	A	A	A	A	A	A	A	A	A	A	A	A	A	A	A	A	A	A
fVW	LipY764_contig167:10750	Indel	GAAAAAATG	GAAAAAAATG	Illumina Array	G	A	Crown	Ad-h	No	G	G	G	G	G	G	G	G	G	G	G	G	G	G	G	G	G	G	G	G	G	G	G	G	G	G	G	G	G	G	G	G	G	G	G	G	G	G	G
fVM	LipY764_contig189:11079	SNV	C	T	Illumina Array	C	T	Crown	Ad-h	Yes	C	C	C	C	C	C	C	C	C	C	C	C	C	C	C	C	C	C	C	C	C	C	C	C	C	C	C	C	C	C	C	C	C	C	C	C	C	C	C
fWP	LipY764_contig192:14225	SNV	C	T	Illumina Array	C	T	Crown	Ad-hA1	Yes	C	C	C	C	C	C	C	C	C	C	C	C	C	C	C	C	C	C	C	C	C	C	C	C	C	C	C	C	C	C	C	C	C	C	C	C	C	C	C
fYZ	LipY764_contig335:2797	SNV	G	A	Illumina Array	G	A	Crown	Ad-h	No	G	G	G	G	G	G	G	G	G	G	G	G	G	G	G	G	G	G	G	G	G	G	G	G	G	G	G	G	G	G	G	G	G	G	G	G	G	G	G
fZQ	LipY764_contig396:2202	SNV	T	G	Illumina Array	T	G	Crown	Ad-h	Yes	T	T	T	T	T	T	T	T	T	T	T	T	T	T	T	T	T	T	T	T	T	T	T	T	T	T	T	T	T	T	T	T	T	T	T	T	T	T	T
fSF	LipY764_contig42:34625	SNV	G	A	Illumina Array	G	A	Crown	Ad-h	No	G	G	G	G	G	G	G	G	G	G	G	G	G	G	G	G	G	G	G	G	G	G	G	G	G	G	G	G	G	G	G	G	G	G	G	G	G	G	G
fAAB	LipY764_contig468:1814	SNV	G	C	Illumina Array	G	C	Crown	Ad-hA1	No	G	G	G	G	G	G	G	G	G	G	G	G	G	G	G	G	G	G	G	G	G	G	G	G	G	G	G	G	G	G	G	G	G	G	G	G	G	G	G
fSP	LipY764_contig49:25035	SNV	C	A	Illumina Array	C	A	Crown	Ad-h	No	C	C	C	C	C	C	C	C	C	C	C	C	C	C	C	C	C	C	C	C	C	C	C	C	C	C	C	C	C	C	C	C	C	C	C	C	C	C	C
fSY	LipY764_contig57:7087	SNV	C	T	Illumina Array	C	T	Crown	Ad-h	Yes	C	C	C	C	C	C	C	C	C	C	C	C	C	C	C	C	C	C	C	C	C	C	C	C	C	C	C	C	C	C	C	C	C	C	C	C	C	C	C
fTA	LipY764_contig59:25124	SNV	A	C	Illumina Array	A	C	Crown	Ad-hB	No	A	A	A	A	A	A	A	A	A	A	A	A	A	A	A	A	A	A	A	A	A	A	A	A	A	A	A	A	A	A	A	A	A	A	A	A	A	A	A
fZN	LipY764_contig6:25497	SNV	A	G	Illumina Array	A	G	Crown	Ad-h	No	A	A	A	A	A	A	A	A	A	A	A	A	A	A	A	A	A	A	A	A	A	A	A	A	A	A	A	A	A	A	A	A	A	A	A	A	A	A	A
fQM	LipY764_contig615:33	SNV	T	G	Illumina Array	T	G	Crown	Ad-h	Yes	T	T	T	T	T	T	T	T	T	T	T	T	T	T	T	T	T	T	T	T	T	T	T	T	T	T	T	T	T	T	T	T	T	T	T	T	T	T	T
rOR	LipY764_contig62:740	SNV	G	A	Illumina Array	G	A	Crown	Ad-h	No	G	G	G	G	G	G	G	G	G	G	G	G	G	G	G	G	G	G	G	G	G	G	G	G	G	G	G	G	G	G	G	G	G	G	G	G	G	G	G
fSL	LipY764_contig79:14073	SNV	C	T	Illumina Array	C	T	Crown	Ad-h	Yes	C	C	C	C	C	C	C	C	C	C	C	C	C	C	C	C	C	C	C	C	C	C	C	C	C	C	C	C	C	C	C	C	C	C	C	C	C	C	C
rX	LipY764_contig296:1984	SNV	G	T	Illumina Array	G	T	Crown	Ao	Yes	G	G	G	G	G	G	G	G	G	G	G	G	G	G	G	G	G	G	G	G	G	G	G	G	T	T	T	T	T	T	T	T	G	G	G	G	G	G	G
fAAX	LipY764_contig14:28873	SNV	G	A	Illumina Array	G	A	Crown	Ao	No	G	G	G	G	G	G	G	G	G	G	G	G	G	G	G	G	G	G	G	G	G	G	G	G	A	A	A	A	A	A	A	A	G	G	G	G	G	G	G
fRJ	LipY764_contig24:7498	SNV	A	G	Illumina Array	A	G	Crown	Ao-a	No	A	A	A	A	A	A	A	A	A	A	A	A	A	A	A	A	A	A	A	A	A	A	A	A	G	G	G	G	G	G	G	G	A	A	A	A	A	A	A
fZC	LipY764_contig345:3648	SNV	T	C	Illumina Array	T	C	Crown	Ao-a	Yes	T	T	T	T	T	T	T	T	T	T	T	T	T	T	T	T	T	T	T	T	T	T	T	T	C	C	C	C	C	C	C	C	T	T	T	T	T	T	T
fVK	LipY764_contig142:11412	SNV	A	G	Illumina Array	A	G	Crown	Ao-aA	No	A	A	A	A	A	A	A	A	A	A	A	A	A	A	A	A	A	A	A	A	A	A	A	A	A	A	A	A	A	A	A	A	A	A	A	A	A	A	A
fVS	LipY764_contig164:7565	SNV	C	A	Illumina Array	C	A	Crown	Ao-aA1b	No	C	C	C	C	C	C	C	C	C	C	C	C	C	C	C	C	C	C	C	C	C	C	C	C	C	C	C	C	C	C	C	C	C	C	C	C	C	C	C
fWV	LipY764_contig201:2430	SNV	G	A	Illumina Array	G	A	Crown	Ao-aM	No	G	G	G	G	G	G	G	G	G	G	G	G	G	G	G	G	G	G	G	G	G	G	G	G	G	G	G	G	G	G	G	G	G	G	G	G	G	G	G
fXI	LipY764_contig222:6314	SNV	G	T	Illumina Array	G	T	Crown	Ao-aA	Yes	G	G	G	G	G	G	G	G	G	G	G	G	G	G	G	G	G	G	G	G	G	G	G	G	G	G	G	G	G	G	G	G	G	G	G	G	G	G	G
fXX	LipY764_contig261:8594	SNV	A	T	Illumina Array	A	T	Crown	Ao-aM	Yes	A	A	A	A	A	A	A	A	A	A	A	A	A	A	A	A	A	A	A	A	A	A	A	A	A	A	A	A	A	A	A	A	A	A	A	A	A	A	A
fYJ	LipY764_contig287:2028	SNV	C	T	Illumina Array	C	T	Crown	Ao-aM	Yes	C	C	C	C	C	C	C	C	C	C	C	C	C	C	C	C	C	C	C	C	C	C	C	C	C	C	C	C	C	C	C	C	C	C	C	C	C	C	C
fZF	LipY764_contig353:5978	SNV	C	T	Illumina Array	C	T	Crown	Ao-aM	Yes	C	C	C	C	C	C	C	C	C	C	C	C	C	C	C	C	C	C	C	C	C	C	C	C	C	C	C	C	C	C	C	C	C	C	C	C	C	C	C
fSE	LipY764_contig41:8032	SNV	T	C	Illumina Array	T	C	Crown	Ao-aA1b	Yes	T	T	T	T	T	T	T	T	T	T	T	T	T	T	T	T	T	T	T	T	T	T	T	T	T	T	T	T	T	T	T	T	T	T	T	T	T	T	T
fAAG	LipY764_contig503:587	SNV	A	G	Illumina Array	A	G	Crown	Ao-aA1a	No	A	A	A	A	A	A	A	A	A	A	A	A	A	A	A	A	A	A	A	A	A	A	A	A	A	A	A	A	A	A	A	A	A	A	A	A	A	A	A
fAAJ	LipY764_contig506:3650	SNV	C	T	Illumina Array	C	T	Crown	Ao-aA	Yes	C	C	C	C	C	C	C	C	C	C	C	C	C	C	C	C	C	C	C	C	C	C	C	C	C	C	C	C	C	C	C	C	C	C	C	C	C	C	C
fSZ	LipY764_contig59:8289	SNV	C	T	Illumina Array	C	T	Crown	Ao-aM	Yes	C	C	C	C	C	C	C	C	C	C	C	C	C	C	C	C	C	C	C	C	C	C	C	C	C	C	C	C	C	C	C	C	C	C	C	C	C	C	C
fTD	LipY764_contig68:22366	SNV	T	C	Illumina Array	T	C	Crown	Ao-aM	Yes	T	T	T	T	T	T	T	T	T	T	T	T	T	T	T	T	T	T	T	T	T	T	T	T	T	T	T	T	T	T	T	T	T	T	T	T	T	T	T
sAP	LipY764_contig79:13336	SNV	A	T	Illumina Array	A	T	Crown	Ao-aM	Yes	A	A	A	A	A	A	A	A	A	A	A	A	A	A	A	A	A	A	A	A	A	A	A	A	A	A	A	A	A	A	A	A	A	A	A	A	A	A	A
fTM	LipY764_contig79:30881	SNV	C	T	Illumina Array	C	T	Crown	Ao-aA1a1	Yes	C	C	C	C	C	C	C	C	C	C	C	C	C	C	C	C	C	C	C	C	C	C	C	C	C	C	C	C	C	C	C	C	C	C	C	C	C	C	C
fTV	LipY764_contig89:7172	SNV	G	A	Illumina Array	G	A	Crown	Ao-aM	No	G	G	G	G	G	G	G	G	G	G	G	G	G	G	G	G	G	G	G	G	G	G	G	G	G	G	G	G	G	G	G	G	G	G	G	G	G	G	G
fUP	LipY764_contig105:5694	SNV	A	G	Illumina Array	A	G	Crown	Ao-n	No	A	A	A	A	A	A	A	A	A	A	A	A	A	A	A	A	A	A	A	A	A	A	A	A	A	A	A	A	A	A	A	A	A	A	A	A	A	A	A
fVX	LipY764_contig168:8736	SNV	A	G	Illumina Array	A	G	Crown	Ao-nM1	No	A	A	A	A	A	A	A	A	A	A	A	A	A	A	A	A	A	A	A	A	A	A	A	A	A	A	A	A	A	A	A	A	A	A	A	A	A	A	A
fXL	LipY764_contig244:3532	SNV	A	G	Illumina Array	A	G	Crown	Ao-n	No	A	A	A	A	A	A	A	A	A	A	A	A	A	A	A	A	A	A	A	A	A	A	A	A	A	A	A	A	A	A	A	A	A	A	A	A	A	A	A
fYF	LipY764_contig281:684	SNV	G	A	Illumina Array	G	A	Crown	Ao-n	No	G	G	G	G	G	G	G	G	G	G	G	G	G	G	G	G	G	G	G	G	G	G	G	G	G	G	G	G	G	G	G	G	G	G	G	G	G	G	G
fZJ	LipY764_contig368:7144	SNV	C	T	Illumina Array	C	T	Crown	Ao-n	Yes	C	C	C	C	C	C	C	C	C	C	C	C	C	C	C	C	C	C	C	C	C	C	C	C	C	C	C	C	C	C	C	C	C	C	C	C	C	C	C
sE	LipY764_contig398:2471	SNV	G	A	Illumina Array	G	A	Crown	Ao-n	No	G	G	G	G	G	G	G	G	G	G	G	G	G	G	G	G	G	G	G	G	G	G	G	G	G	G	G	G	G	G	G	G	G	G	G	G	G	G	G
fSI	LipY764_contig43:20910	SNV	T	G	Illumina Array	T	G	Crown	Ao-nM1b	Yes	T	T	T	T	T	T	T	T	T	T	T	T	T	T	T	T	T	T	T	T	T	T	T	T	T	T	T	T	T	T	T	T	T	T	T	T	T	T	T
fZY	LipY764_contig436:4640	SNV	T	C	Illumina Array	T	C	Crown	Ao-nM1b2	Yes	T	T	T	T	T	T	T	T	T	T	T	T	T	T	T	T	T	T	T	T	T	T	T	T	T	T	T	T	T	T	T	T	T	T	T	T	T	T	T
fAAO	LipY764_contig564:2107	SNV	G	T	Illumina Array	G	T	Crown	Ao-n	Yes	G	G	G	G	G	G	G	G	G	G	G	G	G	G	G	G	G	G	G	G	G	G	G	G	G	G	G	G	G	G	G	G	G	G	G	G	G	G	G
fTQ	LipY764_contig82:13818	SNV	A	G	Illumina Array	A	G	Crown	Ao-nM1b	No	A	A	A	A	A	A	A	A	A	A	A	A	A	A	A	A	A	A	A	A	A	A	A	A	A	A	A	A	A	A	A	A	A	A	A	A	A	A	A
fYR	LipY764_contig312:3646	SNV	T	A	Illumina Array	T	A	Crown	H	Yes	T	T	T	T	T	T	T	T	T	T	T	T	T	T	T	T	T	T	T	T	T	T	T	T	T	T	T	T	T	T	T	T	T	T	T	T	T	T	T
fBZU	LipY764_contig575:452	SNV	G	A	Illumina Array	G	A	Crown	H	No	G	G	G	G	G	G	G	G	G	G	G	G	G	G	G	G	G	G	G	G	G	G	G	G	G	G	G	G	G	G	G	G	G	G	G	G	G	G	G
fABE	LipY764_contig18:7704	SNV	A	T	Illumina Array	A	T	Crown cond	Crown cond	No	T	T	T	T	T	T	T	T	T	T	T	T	T	T	T	T	T	T	T	T	T	T	T	T	T	T	T	T	T	T	T	T	T	T	T	T	T	T	T
rAX	LipY764_contig359:7646	SNV	T	C	Illumina Array	T	C	Crown cond	Crown cond	Yes	C	C	C	C	C	C	C	C	C	C	C	C	C	C	C	C	C	C	C	C	C	C	C	C	C	C	C	C	C	C	C	C	C	C	C	C	C	C	C
fZM	LipY764_contig383:6635	SNV	C	T	Illumina Array	C	T	Crown cond	Crown cond	Yes	T	T	T	T	T	T	T	T	T	T	T	T	T	T	T	T	T	T	T	T	T	T	T	T	T	T	T	T	T	T	T	T	T	T	T	T	T	T	T
fAAN	LipY764_contig6:27268	SNV	T	G	Illumina Array	T	G	Crown cond	Crown cond	Yes	G	G	G	G	G	G	G	G	G	G	G	G	G	G	G	G	G	G	G	G	G	G	G	G	G	G	G	G	G	G	G	G	G	G	G	G	G	G	G
fAAR	LipY764_contig6:35119	SNV	C	G	Illumina Array	C	G	Crown cond	Crown cond	No	G	G	G	G	G	G	G	G	G	G	G	G	G	G	G	G	G	G	G	G	G	G	G	G	G	G	G	G	G	G	G	G	G	G	G	G	G	G	G
fTL	LipY764_contig79:14084	SNV	A	G	Illumina Array	A	G	Crown cond	Crown cond	No	G	G	G	G	G	G	G	G	G	G	G	G	G	G	G	G	G	G	G	G	G	G	G	G	G	G	G	G	G	G	G	G	G	G	G	G	G	G	G
fUR	LipY764_contig106:17949	SNV	A	G	Illumina Array	A	G	Crown	Hc	No	A	A	A	A	A	A	A	A	A	A	A	A	A	A	A	A	A	A	A	A	A	A	A	A	A	A	A	A	A	A	A	A	A	A	A	A	A	A	A
fXM	LipY764_contig5:48694	SNV	C	T	Illumina Array	C	T	Crown	Hc	Yes	C	C	C	C	C	C	C	C	C	C	C	C	C	C	C	C	C	C	C	C	C	C	C	C	C	C	C	C	C	C	C	C	C	C	C	C	C	C	C
sQB	LipY764_contig9:14318	SNV	A	T	Illumina Array	A	T	Crown	Hc	No	A	A	A	A	A	A	A	A	A	A	A	A	A	A	A	A	A	A	A	A	A	A	A	A	A	A	A	A	A	A	A	A	A	A	A	A	A	A	A
fWQ	LipY764_contig193:6579	SNV	G	A	Illumina Array	G	A	Crown	Hs	No	G	G	G	G	G	G	G	G	G	G	G	G	G	G	G	G	G	G	G	G	G	G	G	G	G	G	G	G	G	G	G	G	G	G	G	G	G	G	G
fXC	LipY764_contig209:10341	SNV	A	C	Illumina Array	A	C	Crown	Hs	No	A	A	A	A	A	A	A	A	A	A	A	A	A	A	A	A	A	A	A	A	A	A	A	A	A	A	A	A	A	A	A	A	A	A	A	A	A	A	A
fSQ	LipY764_contig49:30278	SNV	C	T	Illumina Array	C	T	Crown	Hs	Yes	C	C	C	C	C	C	C	C	C	C	C	C	C	C	C	C	C	C	C	C	C	C	C	C	C	C	C	C	C	C	C	C	C	C	C	C	C	C	C
rAL	LipY764_contig16:12521	SNV	A	G	Illumina Array	A	G	Crown	Hs-aA	No	A	A	A	A	A	A	A	A	A	A	A	A	A	A	A	A	A	A	A	A	A	A	A	A	A	A	A	A	A	A	A	A	A	A	A	A	A	A	A
fWL	LipY764_contig189:1747	SNV	T	A	Illumina Array	T	A	Crown	Hs-aB	No	T	T	T	T	T	T	T	T	T	T	T	T	T	T	T	T	T	T	T	T	T	T	T	T	T	T	T	T	T	T	T	T	T	T	T	T	T	T	T
fTI	LipY764_contig78:6725	SNV	C	T	Illumina Array	C	T	Crown	Hs-a	Yes	C	C	C	C	C	C	C	C	C	C	C	C	C	C	C	C	C	C	C	C	C	C	C	C	C	C	C	C	C	C	C	C	C	C	C	C	C	C	C
rAM	LipY764_contig88:652	SNV	T	G	Illumina Array	T	G	Crown	Hs-aB	Yes	T	T	T	T	T	T	T	T	T	T	T	T	T	T	T	T	T	T	T	T	T	T	T	T	T	T	T	T	T	T	T	T	T	T	T	T	T	T	T
fYV	LipY764_contig328:1288	SNV	G	A	Illumina Array	G	A	Crown	T(1)	No	G	G	G	G	G	G	G	G	G	G	G	G	G	G	G	G	G	G	G	G	G	G	G	G	G	G	G	G	G	G	G	G	A	A	A	A	A	A	A
fWU	LipY764_contig198:17295	SNV	T	A	Illumina Array	T	A	Crown	Tb-o	Yes	T	T	T	T	T	T	T	T	T	T	T	T	T	T	T	T	T	T	T	T	T	T	T	T	T	T	T	T	T	T	T	T	A	A	A	A	A	A	A
fXF	LipY764_contig212:14480	SNV	G	A	Illumina Array	G	A	Crown	Tb-o	No	G	G	G	G	G	G	G	G	G	G	G	G	G	G	G	G	G	G	G	G	G	G	G	G	G	G	G	G	G	G	G	G	A	A	A	A	A	A	A
fQI	LipY764_contig94:19794	SNV	G	C	Illumina Array	G	C	Crown	Tb-oB3	No	G	G	G	G	G	G	G	G	G	G	G	G	G	G	G	G	G	G	G	G	G	G	G	G	G	G	G	G	G	G	G	G	C	C	C	C	C	C	C
rJ	LipY764_contig20:20763	SNV	C	G	Illumina Array	C	G	Crown	Tb-oB3b	Yes	C	C	C	C	C	C	C	C	C	C	C	C	C	C	C	C	C	C	C	C	C	C	C	C	C	C	C	C	C	C	C	C	G	G	G	G	G	G	G
sQA	LipY764_contig248:6171	SNV	A	G	Illumina Array	A	G	Crown	Ta	No	A	A	A	A	A	A	A	A	A	A	A	A	A	A	A	A	A	A	A	A	A	A	A	A	A	A	A	A	A	A	A	A	A	A	A	A	A	A	A
fZK	LipY764_contig372:1956	SNV	G	C	Illumina Array	G	C	Crown	Ta	Yes	G	G	G	G	G	G	G	G	G	G	G	G	G	G	G	G	G	G	G	G	G	G	G	G	G	G	G	G	G	G	G	G	G	G	G	G	G	G	G
sPZ	LipY764_contig4:39228	SNV	T	A	Illumina Array	T	A	Crown	Ta	Yes	T	T	T	T	T	T	T	T	T	T	T	T	T	T	T	T	T	T	T	T	T	T	T	T	T	T	T	T	T	T	T	T	T	T	T	T	T	T	T
fRL	LipY764_contig47:5799	SNV	C	A	Illumina Array	C	A	Crown	Ta	No	C	C	C	C	C	C	C	C	C	C	C	C	C	C	C	C	C	C	C	C	C	C	C	C	C	C	C	C	C	C	C	C	C	C	C	C	C	C	C
fUN	LipY764_contig105:4267	SNV	C	A	Illumina Array	C	A	Crown	Tb-oL1	No	C	C	C	C	C	C	C	C	C	C	C	C	C	C	C	C	C	C	C	C	C	C	C	C	C	C	C	C	C	C	C	C	C	C	C	C	C	C	C
fWZ	LipY764_contig206:9514	SNV	T	C	Illumina Array	T	C	Crown	Tb-oL	Yes	T	T	T	T	T	T	T	T	T	T	T	T	T	T	T	T	T	T	T	T	T	T	T	T	T	T	T	T	T	T	T	T	T	T	T	T	T	T	T
fYT	LipY764_contig326:6434	SNV	G	A	Illumina Array	G	A	Crown	Tb-dW1d	No	G	G	G	G	G	G	G	G	G	G	G	G	G	G	G	G	G	G	G	G	G	G	G	G	G	G	G	G	G	G	G	G	G	G	G	G	G	G	G
fYY	LipY764_contig329:1851	SNV	G	A	Illumina Array	G	A	Crown	Tb-dW1c3	No	G	G	G	G	G	G	G	G	G	G	G	G	G	G	G	G	G	G	G	G	G	G	G	G	G	G	G	G	G	G	G	G	G	G	G	G	G	G	G
rN	LipY764_contig76:5598	SNV	C	T	Illumina Array	C	T	Crown	Tb-oL	Yes	C	C	C	C	C	C	C	C	C	C	C	C	C	C	C	C	C	C	C	C	C	C	C	C	C	C	C	C	C	C	C	C	C	C	C	C	C	C	C
fUZ	LipY764_contig117:3091	SNV	C	T	Illumina Array	C	T	Crown	Tb-d	Yes	C	C	C	C	C	C	C	C	C	C	C	C	C	C	C	C	C	C	C	C	C	C	C	C	C	C	C	C	C	C	C	C	C	C	C	C	C	C	C
fAAC	LipY764_contig468:3932	SNV	A	T	Illumina Array	A	T	Crown	Tb-d	Yes	A	A	A	A	A	A	A	A	A	A	A	A	A	A	A	A	A	A	A	A	A	A	A	A	A	A	A	A	A	A	A	A	A	A	A	A	A	A	A
fYM	LipY764_contig6:6327	SNV	A	G	Illumina Array	A	G	Crown	Tb-d	No	A	A	A	A	A	A	A	A	A	A	A	A	A	A	A	A	A	A	A	A	A	A	A	A	A	A	A	A	A	A	A	A	A	A	A	A	A	A	A
fVL	LipY764_contig5:41776	SNV	A	C	Illumina Array	A	C	Crown	Tb-d	No	A	A	A	A	A	A	A	A	A	A	A	A	A	A	A	A	A	A	A	A	A	A	A	A	A	A	A	A	A	A	A	A	A	A	A	A	A	A	A
fXR	LipY764_contig255:12988	SNV	C	A	Illumina Array	C	A	Crown	Tb-d	No	C	C	C	C	C	C	C	C	C	C	C	C	C	C	C	C	C	C	C	C	C	C	C	C	C	C	C	C	C	C	C	C	C	C	C	C	C	C	C
rG	LipY764_contig146:3345	SNV	T	C	Illumina Array	T	C	Crown	Tb-dM	Yes	T	T	T	T	T	T	T	T	T	T	T	T	T	T	T	T	T	T	T	T	T	T	T	T	T	T	T	T	T	T	T	T	T	T	T	T	T	T	T
fZI	LipY764_contig367:512	SNV	G	T	Illumina Array	G	T	Crown	Tb-dW1c2	Yes	G	G	G	G	G	G	G	G	G	G	G	G	G	G	G	G	G	G	G	G	G	G	G	G	G	G	G	G	G	G	G	G	G	G	G	G	G	G	G
fWM	LipY764_contig5:42484	SNV	T	C	Illumina Array	T	C	Crown	Tb-dW	Yes	T	T	T	T	T	T	T	T	T	T	T	T	T	T	T	T	T	T	T	T	T	T	T	T	T	T	T	T	T	T	T	T	T	T	T	T	T	T	T
sP	LipY764_contig155:6894	SNV	A	C	Illumina Array	A	C	Crown	Tb-dW2	No	A	A	A	A	A	A	A	A	A	A	A	A	A	A	A	A	A	A	A	A	A	A	A	A	A	A	A	A	A	A	A	A	A	A	A	A	A	A	A
fVQ	LipY764_contig164:1350	SNV	T	C	Illumina Array	T	C	Crown	Tb-dM	Yes	T	T	T	T	T	T	T	T	T	T	T	T	T	T	T	T	T	T	T	T	T	T	T	T	T	T	T	T	T	T	T	T	T	T	T	T	T	T	T
sM	LipY764_contig197:5419	SNV	C	T	Illumina Array	C	T	Crown	Tb-dW2	Yes	C	C	C	C	C	C	C	C	C	C	C	C	C	C	C	C	C	C	C	C	C	C	C	C	C	C	C	C	C	C	C	C	C	C	C	C	C	C	C
rC	LipY764_contig213:4369	SNV	T	C	Illumina Array	T	C	Crown	Tb-d	Yes	T	T	T	T	T	T	T	T	T	T	T	T	T	T	T	T	T	T	T	T	T	T	T	T	T	T	T	T	T	T	T	T	T	T	T	T	T	T	T
fZU	LipY764_contig411:1953	SNV	T	C	Illumina Array	T	C	Crown	Tb-dW1c	Yes	T	T	T	T	T	T	T	T	T	T	T	T	T	T	T	T	T	T	T	T	T	T	T	T	T	T	T	T	T	T	T	T	T	T	T	T	T	T	T
fZZ	LipY764_contig441:559	SNV	A	T	Illumina Array	A	T	Crown	Tb-dM	Yes	A	A	A	A	A	A	A	A	A	A	A	A	A	A	A	A	A	A	A	A	A	A	A	A	A	A	A	A	A	A	A	A	A	A	A	A	A	A	A
rE	LipY764_contig78:24505	SNV	A	G	Illumina Array	A	G	Crown	Tb-dW1c1	No	A	A	A	A	A	A	A	A	A	A	A	A	A	A	A	A	A	A	A	A	A	A	A	A	A	A	A	A	A	A	A	A	A	A	A	A	A	A	A
fUB	LipY764_contig92:8125	SNV	T	G	Illumina Array	T	G	Crown	Tb-dW1c1	Yes	T	T	T	T	T	T	T	T	T	T	T	T	T	T	T	T	T	T	T	T	T	T	T	T	T	T	T	T	T	T	T	T	T	T	T	T	T	T	T
rO	LipY764_contig10:3227	SNV	C	T	Illumina Array	C	T	Crown	Tb-oB1b	Yes	C	C	C	C	C	C	C	C	C	C	C	C	C	C	C	C	C	C	C	C	C	C	C	C	C	C	C	C	C	C	C	C	C	C	C	C	C	C	C
fAAU	LipY764_contig11:18668	SNV	G	A	Illumina Array	G	A	Crown	Tb-oB3b1c	No	G	G	G	G	G	G	G	G	G	G	G	G	G	G	G	G	G	G	G	G	G	G	G	G	G	G	G	G	G	G	G	G	G	G	G	G	G	G	G
fWA	LipY764_contig169:5976	SNV	G	A	Illumina Array	G	A	Crown	Tb-oB3b1b1a	No	G	G	G	G	G	G	G	G	G	G	G	G	G	G	G	G	G	G	G	G	G	G	G	G	G	G	G	G	G	G	G	G	G	G	G	G	G	G	G
fWB	LipY764_contig169:6045	SNV	C	T	Illumina Array	C	T	Crown	Tb-oB1c	Yes	C	C	C	C	C	C	C	C	C	C	C	C	C	C	C	C	C	C	C	C	C	C	C	C	C	C	C	C	C	C	C	C	C	C	C	C	C	C	C
rK	LipY764_contig235:12976	SNV	T	G	Illumina Array	T	G	Crown	Tb-oB3b1	Yes	T	T	T	T	T	T	T	T	T	T	T	T	T	T	T	T	T	T	T	T	T	T	T	T	T	T	T	T	T	T	T	T	G	G	G	G	G	G	G
fZP	LipY764_contig393:360	SNV	C	T	Illumina Array	C	T	Crown	Tb-oB3b1b	Yes	C	C	C	C	C	C	C	C	C	C	C	C	C	C	C	C	C	C	C	C	C	C	C	C	C	C	C	C	C	C	C	C	C	C	C	C	C	C	C
rP	LipY764_contig46:10000	SNV	A	C	Illumina Array	A	C	Crown	Tb-oB2	No	A	A	A	A	A	A	A	A	A	A	A	A	A	A	A	A	A	A	A	A	A	A	A	A	A	A	A	A	A	A	A	A	A	A	A	A	A	A	A
fAAF	LipY764_contig494:3637	SNV	G	T	Illumina Array	G	T	Crown	Tb-oB1c	Yes	G	G	G	G	G	G	G	G	G	G	G	G	G	G	G	G	G	G	G	G	G	G	G	G	G	G	G	G	G	G	G	G	G	G	G	G	G	G	G
fAAL	LipY764_contig513:1367	SNV	G	T	Illumina Array	G	T	Crown	Tb-oB2b	Yes	G	G	G	G	G	G	G	G	G	G	G	G	G	G	G	G	G	G	G	G	G	G	G	G	G	G	G	G	G	G	G	G	G	G	G	G	G	G	G
fTW	LipY764_contig89:23469	SNV	A	G	Illumina Array	A	G	Crown	Tb-oB2b2	No	A	A	A	A	A	A	A	A	A	A	A	A	A	A	A	A	A	A	A	A	A	A	A	A	A	A	A	A	A	A	A	A	A	A	A	A	A	A	A
fABS	LipY764_contig255:578	SNV	A	C	Illumina Array	A	C	Crown	Tu-c	No	A	A	A	A	A	A	A	A	A	A	A	A	A	A	A	A	A	A	A	A	A	A	A	A	A	A	A	A	A	A	A	A	A	A	A	A	A	A	A
fZS	LipY764_contig407:1649	SNV	T	C	Illumina Array	T	C	Crown	Tu	Yes	T	T	T	T	T	T	T	T	T	T	T	T	T	T	T	T	T	T	T	T	T	T	T	T	T	T	T	T	T	T	T	T	T	T	T	T	T	T	T
fZO	LipY764_contig530:2961	SNV	G	C	Illumina Array	G	C	Crown	Tu-c	No	G	G	G	G	G	G	G	G	G	G	G	G	G	G	G	G	G	G	G	G	G	G	G	G	G	G	G	G	G	G	G	G	G	G	G	G	G	G	G
fVG	LipY764_contig123:23078	SNV	A	G	Illumina Array	A	G	Caballus	I	No	A	A	A	A	A	A	A	A	A	A	A	A	A	A	A	A	A	A	A	A	A	A	A	A	A	A	A	A	A	A	A	A	A	A	A	A	A	A	A
rAP	LipY764_contig135:1931	SNV	G	A	Illumina Array	G	A	Caballus	I	No	G	G	G	G	G	G	G	G	G	G	G	G	G	G	G	G	G	G	G	G	G	G	G	G	G	G	G	G	G	G	G	G	G	G	G	G	G	G	G
rAO	LipY764_contig139:4078	SNV	T	C	Illumina Array	T	C	Caballus	I	Yes	T	T	T	T	T	T	T	T	T	T	T	T	T	T	T	T	T	T	T	T	T	T	T	T	T	T	T	T	T	T	T	T	T	T	T	T	T	T	T
fWE	LipY764_contig172:6946	SNV	A	G	Illumina Array	A	G	Caballus	I	No	A	A	A	A	A	A	A	A	A	A	A	A	A	A	A	A	A	A	A	A	A	A	A	A	A	A	A	A	A	A	A	A	A	A	A	A	A	A	A
rAU	LipY764_contig179:3909	SNV	C	T	Illumina Array	C	T	Caballus	I	Yes	C	C	C	C	C	C	C	C	C	C	C	C	C	C	C	C	C	C	C	C	C	C	C	C	C	C	C	C	C	C	C	C	C	C	C	C	C	C	C
fWI	LipY764_contig180:17292	SNV	G	A	Illumina Array	G	A	Caballus	I	No	G	G	G	G	G	G	G	G	G	G	G	G	G	G	G	G	G	G	G	G	G	G	G	G	G	G	G	G	G	G	G	G	G	G	G	G	G	G	G
fWK	LipY764_contig186:9425	SNV	G	A	Illumina Array	G	A	Caballus	I	No	G	G	G	G	G	G	G	G	G	G	G	G	G	G	G	G	G	G	G	G	G	G	G	G	G	G	G	G	G	G	G	G	G	G	G	G	G	G	G
fWR	LipY764_contig193:8362	SNV	C	T	Illumina Array	C	T	Caballus	I	Yes	C	C	C	C	C	C	C	C	C	C	C	C	C	C	C	C	C	C	C	C	C	C	C	C	C	C	C	C	C	C	C	C	C	C	C	C	C	C	C
rAR	LipY764_contig197:10189	SNV	A	G	Illumina Array	A	G	Caballus	I	No	A	A	A	A	A	A	A	A	A	A	A	A	A	A	A	A	A	A	A	A	A	A	A	A	A	A	A	A	A	A	A	A	A	A	A	A	A	A	A
fXP	LipY764_contig250:9511	SNV	C	T	Illumina Array	C	T	Caballus	I	Yes	C	C	C	C	C	C	C	C	C	C	C	C	C	C	C	C	C	C	C	C	C	C	C	C	C	C	C	C	C	C	C	C	C	C	C	C	C	C	C
fRR	LipY764_contig32:13453	SNV	G	A	Illumina Array	G	A	Caballus	I	No	G	G	G	G	G	G	G	G	G	G	G	G	G	G	G	G	G	G	G	G	G	G	G	G	G	G	G	G	G	G	G	G	G	G	G	G	G	G	G
fRS	LipY764_contig32:21800	SNV	T	G	Illumina Array	T	G	Caballus	I	Yes	T	T	T	T	T	T	T	T	T	T	T	T	T	T	T	T	T	T	T	T	T	T	T	T	T	T	T	T	T	T	T	T	T	T	T	T	T	T	T
rAS	LipY764_contig321:4065	SNV	G	A	Illumina Array	G	A	Caballus	I	No	G	G	G	G	G	G	G	G	G	G	G	G	G	G	G	G	G	G	G	G	G	G	G	G	G	G	G	G	G	G	G	G	G	G	G	G	G	G	G
fZA	LipY764_contig335:6418	SNV	C	T	Illumina Array	C	T	Caballus	I	Yes	C	C	C	C	C	C	C	C	C	C	C	C	C	C	C	C	C	C	C	C	C	C	C	C	C	C	C	C	C	C	C	C	C	C	C	C	C	C	C
fZD	LipY764_contig347:4454	SNV	A	T	Illumina Array	A	T	Caballus	I	Yes	A	A	A	A	A	A	A	A	A	A	A	A	A	A	A	A	A	A	A	A	A	A	A	A	A	A	A	A	A	A	A	A	A	A	A	A	A	A	A
fQJ	LipY764_contig369:74	SNV	A	G	Illumina Array	A	G	Caballus	I	No	A	A	A	A	A	A	A	A	A	A	A	A	A	A	A	A	A	A	A	A	A	A	A	A	A	A	A	A	A	A	A	A	A	A	A	A	A	A	A
fRW	LipY764_contig37:11982	SNV	C	T	Illumina Array	C	T	Caballus	I	Yes	C	C	C	C	C	C	C	C	C	C	C	C	C	C	C	C	C	C	C	C	C	C	C	C	C	C	C	C	C	C	C	C	C	C	C	C	C	C	C
fSK	LipY764_contig4:53532	SNV	A	G	Illumina Array	A	G	Caballus	I	No	A	A	A	A	A	A	A	A	A	A	A	A	A	A	A	A	A	A	A	A	A	A	A	A	A	A	A	A	A	A	A	A	A	A	A	A	A	A	A
rAT	LipY764_contig51:7388	SNV	C	T	Illumina Array	C	T	Caballus	I	Yes	C	C	C	C	C	C	C	C	C	C	C	C	C	C	C	C	C	C	C	C	C	C	C	C	C	C	C	C	C	C	C	C	C	C	C	C	C	C	C
fUD	LipY764_contig97:13116	SNV	C	T	Illumina Array	C	T	Caballus	I	Yes	C	C	C	C	C	C	C	C	C	C	C	C	C	C	C	C	C	C	C	C	C	C	C	C	C	C	C	C	C	C	C	C	C	C	C	C	C	C	C
fVP	LipY764_contig163:1338	SNV	A	G	Illumina Array	A	G	Caballus	N	No	A	A	A	A	A	A	A	A	A	A	A	A	A	A	A	A	A	A	A	A	A	A	A	A	A	A	A	A	A	A	A	A	A	A	A	A	A	A	A
fVV	LipY764_contig167:4903	SNV	C	G	Illumina Array	C	G	Caballus	N	No	C	C	C	C	C	C	C	C	C	C	C	C	C	C	C	C	C	C	C	C	C	C	C	C	C	C	C	C	C	C	C	C	C	C	C	C	C	C	C
rBC	LipY764_contig203:14176	SNV	T	C	Illumina Array	T	C	Caballus	N	Yes	T	T	T	T	T	T	T	T	T	T	T	T	T	T	T	T	T	T	T	T	T	T	T	T	T	T	T	T	T	T	T	T	T	T	T	T	T	T	T
fZE	LipY764_contig348:1510	SNV	C	T	Illumina Array	C	T	Caballus	N	Yes	C	C	C	C	C	C	C	C	C	C	C	C	C	C	C	C	C	C	C	C	C	C	C	C	C	C	C	C	C	C	C	C	C	C	C	C	C	C	C
fYN	LipY764_contig387:808	SNV	T	C	Illumina Array	T	C	Caballus	N	Yes	T	T	T	T	T	T	T	T	T	T	T	T	T	T	T	T	T	T	T	T	T	T	T	T	T	T	T	T	T	T	T	T	T	T	T	T	T	T	T
fAAP	LipY764_contig639:590	SNV	C	T	Illumina Array	C	T	Caballus	N	Yes	C	C	C	C	C	C	C	C	C	C	C	C	C	C	C	C	C	C	C	C	C	C	C	C	C	C	C	C	C	C	C	C	C	C	C	C	C	C	C
rBD	LipY764_contig9:18120	SNV	C	T	Illumina Array	C	T	Caballus	N	Yes	C	C	C	C	C	C	C	C	C	C	C	C	C	C	C	C	C	C	C	C	C	C	C	C	C	C	C	C	C	C	C	C	C	C	C	C	C	C	C
rAZ	LipY764_contig214:707	SNV	T	C	Illumina Array	T	C	Caballus	N	Yes	T	T	T	T	T	T	T	T	T	T	T	T	T	T	T	T	T	T	T	T	T	T	T	T	T	T	T	T	T	T	T	T	T	T	T	T	T	T	T
fBWV	LipY764_contig324:6910	SNV	C	A	Illumina Array	C	A	Caballus	N	No	C	C	C	C	C	C	C	C	C	C	C	C	C	C	C	C	C	C	C	C	C	C	C	C	C	C	C	C	C	C	C	C	C	C	C	C	C	C	C
fTH	LipY764_contig78:3901	SNV	A	G	Illumina Array	A	G	Caballus	N	No	A	A	A	A	A	A	A	A	A	A	A	A	A	A	A	A	A	A	A	A	A	A	A	A	A	A	A	A	A	A	A	A	A	A	A	A	A	A	A
fTZ	LipY764_contig91:18179	SNV	G	C	Illumina Array	G	C	Caballus	N	No	G	G	G	G	G	G	G	G	G	G	G	G	G	G	G	G	G	G	G	G	G	G	G	G	G	G	G	G	G	G	G	G	G	G	G	G	G	G	G
fUQ	LipY764_contig106:9139	SNV	C	A	Illumina Array	C	A	Caballus	N	No	C	C	C	C	C	C	C	C	C	C	C	C	C	C	C	C	C	C	C	C	C	C	C	C	C	C	C	C	C	C	C	C	C	C	C	C	C	C	C
fBVW	LipY764_contig220:1873	SNV	A	T	Illumina Array	A	T	Caballus	N	No	A	A	A	A	A	A	A	A	A	A	A	A	A	A	A	A	A	A	A	A	A	A	A	A	A	A	A	A	A	A	A	A	A	A	A	A	A	A	A
fXU	LipY764_contig258:7058	SNV	G	C	Illumina Array	G	C	Caballus	N	Yes	G	G	G	G	G	G	G	G	G	G	G	G	G	G	G	G	G	G	G	G	G	G	G	G	G	G	G	G	G	G	G	G	G	G	G	G	G	G	G
fYC	LipY764_contig274:1711	SNV	C	T	Illumina Array	C	T	Caballus	N	Yes	C	C	C	C	C	C	C	C	C	C	C	C	C	C	C	C	C	C	C	C	C	C	C	C	C	C	C	C	C	C	C	C	C	C	C	C	C	C	C
fSC	LipY764_contig40:11878	SNV	A	G	Illumina Array	A	G	Caballus	N	No	A	A	A	A	A	A	A	A	A	A	A	A	A	A	A	A	A	A	A	A	A	A	A	A	A	A	A	A	A	A	A	A	A	A	A	A	A	A	A
fSD	LipY764_contig40:23503	SNV	A	T	Illumina Array	A	T	Caballus	N	No	A	A	A	A	A	A	A	A	A	A	A	A	A	A	A	A	A	A	A	A	A	A	A	A	A	A	A	A	A	A	A	A	A	A	A	A	A	A	A
fSJ	LipY764_contig43:26644	SNV	T	C	Illumina Array	T	C	Caballus	N	Yes	T	T	T	T	T	T	T	T	T	T	T	T	T	T	T	T	T	T	T	T	T	T	T	T	T	T	T	T	T	T	T	T	T	T	T	T	T	T	T
fSM	LipY764_contig49:2135	SNV	C	T	Illumina Array	C	T	Caballus	N	Yes	C	C	C	C	C	C	C	C	C	C	C	C	C	C	C	C	C	C	C	C	C	C	C	C	C	C	C	C	C	C	C	C	C	C	C	C	C	C	C
fBUL	LipY764_contig62:3588	SNV	T	A	Illumina Array	T	A	Caballus	N	Yes	T	T	T	T	T	T	T	T	T	T	T	T	T	T	T	T	T	T	T	T	T	T	T	T	T	T	T	T	T	T	T	T	T	T	T	T	T	T	T
rBB	LipY764_contig65:2816	Indel	GTTTTTTTTTTAAATC	GTTTTTTTTTAAATC,GTTTTTTTTTTTAAATC,GTTTTTTTTTAAAATC,GTTTTTTTTTGAAATC,GTTTTTTTTTTAAACC,GTTTTTTTTTTAAATA,GATTTTTTTTTAAATC,ATTTTTTTTTTAAATC	Illumina Array	G	A	Caballus	N	No	G	G	G	G	G	G	G	G	G	G	G	G	G	G	G	G	G	G	G	G	G	G	G	G	G	G	G	G	G	G	G	G	G	G	G	G	G	G	G
fTF	LipY764_contig77:4102	SNV	C	T	Illumina Array	C	T	Caballus	N	Yes	C	C	C	C	C	C	C	C	C	C	C	C	C	C	C	C	C	C	C	C	C	C	C	C	C	C	C	C	C	C	C	C	C	C	C	C	C	C	C
fUE	LipY764_contig97:13344	SNV	A	T	Illumina Array	A	T	Caballus	N	Yes	A	A	A	A	A	A	A	A	A	A	A	A	A	A	A	A	A	A	A	A	A	A	A	A	A	A	A	A	A	A	A	A	A	A	A	A	A	A	A
rAF	LipY764_contig112:2021	SNV	G	A	KASP	G	A	Crown	Ad	-	A	A	A	A	A	A	A	A	A	A	A	A	A	A	A	A	A	A	A	A	A	A	A	G	G	G	G	G	G	G	G	G	G	G	G	G	G	G	G
rDT	LipY764_contig367:4708	SNV	T	C	KASP	T	C	Crown	Ad-b	-	C	C	C	C	C	C	C	C	C	C	C	C	C	C	C	C	C	C	C	C	C	C	C	T	T	T	T	T	T	T	T	T	T	T	T	T	T	T	T
qCU	LipY764_contig158:20638	SNV	T	A	KASP	T	A	Crown	Am	-	T	T	T	T	T	T	T	T	T	T	T	T	T	T	T	T	T	T	T	T	T	T	T	A	T	T	T	T	T	T	T	T	T	T	T	T	T	T	T
qCR	LipY764_contig150:7158	SNV	T	C	KASP	T	C	Crown	Ao-aD	-	T	T	T	T	T	T	T	T	T	T	T	T	T	T	T	T	T	T	T	T	T	T	T	T	C	C	C	C	C	C	C	C	T	T	T	T	T	T	T
qW	LipY764_contig22:11458	SNV	C	T	KASP	C	T	Crown	Ao-aD2	-	C	C	C	C	C	C	C	C	C	C	C	C	C	C	C	C	C	C	C	C	C	C	C	C	T	T	T	T	T	T	T	T	C	C	C	C	C	C	C
[truncated: 212 more columns]

## Sheet: S7_Y-chr_HGs
Table S7: MSY HG affiliation in male KHs (n=43) and global modern horse dataset (n=157) [34]
Samples	Study	NCBI accession	Major Group	Haplogroup	Haplotype reported in Remer et al. 2022	Haplotype in this study	Population (KHs) / Breed
TA_002_1	This Study	-	Crown	Ad-b	-	Ad-b	Kaimanawa
AR_010_1	This Study	-	Crown	Ad-b	-	Ad-b	Kaimanawa
TE_011_1	This Study	-	Crown	Ad-b	-	Ad-b	Kaimanawa
CA_015_1	This Study	-	Crown	Ad-b	-	Ad-b	Kaimanawa
PA_032_1	This Study	-	Crown	Ad-b	-	Ad-b	Kaimanawa
MU_034_1	This Study	-	Crown	Ad-b	-	Ad-b	Kaimanawa
TB_037_1	This Study	-	Crown	Ad-b	-	Ad-b	Kaimanawa
KO_038_1	This Study	-	Crown	Ad-b	-	Ad-b	Kaimanawa
FL_041_1	This Study	-	Crown	Ad-b	-	Ad-b	Kaimanawa
ZO_046_1	This Study	-	Crown	Ad-b	-	Ad-b	Kaimanawa
LE_050_1	This Study	-	Crown	Ad-b	-	Ad-b	Kaimanawa
BE_052_1	This Study	-	Crown	Ad-b	-	Ad-b	Kaimanawa
RA_059_1	This Study	-	Crown	Ad-b	-	Ad-b	Kaimanawa
HE_061_1	This Study	-	Crown	Ad-b	-	Ad-b	Kaimanawa
CR_064_1	This Study	-	Crown	Ad-b	-	Ad-b	Kaimanawa
RO_073_1	This Study	-	Crown	Ad-b	-	Ad-b	Kaimanawa
EC_076_1	This Study	-	Crown	Ad-b	-	Ad-b	Kaimanawa
ST_079_1	This Study	-	Crown	Ad-b	-	Ad-b	Kaimanawa
SE_080_1	This Study	-	Crown	Ad-b	-	Ad-b	Kaimanawa
GA_093_1	This Study	-	Crown	Ad-b	-	Ad-b	Kaimanawa
BR_097_1	This Study	-	Crown	Ad-b	-	Ad-b	Kaimanawa
RO_102_1	This Study	-	Crown	Ad-b	-	Ad-b	Kaimanawa
BR_107_1	This Study	-	Crown	Ad-b	-	Ad-b	Kaimanawa
DC1000267	This Study	-	Crown	Am	-	Am	Kaimanawa
BR_110_1	This Study	-	Crown	Ao-aD	-	Ao-aD2	Kaimanawa
PO_007_1	This Study	-	Crown	Ao-aD	-	Ao-aD2	Kaimanawa
BH_008_1	This Study	-	Crown	Ao-aD	-	Ao-aD2	Kaimanawa
EL_030_1	This Study	-	Crown	Ao-aD	-	Ao-aD2	Kaimanawa
CA_031_1	This Study	-	Crown	Ao-aD	-	Ao-aD2	Kaimanawa
DE_036_1	This Study	-	Crown	Ao-aD	-	Ao-aD2	Kaimanawa
BE_101_1	This Study	-	Crown	Ao-aD	-	Ao-aD2	Kaimanawa
CH_009_1	This Study	-	Crown	Ao-aD	-	Ao-aD2	Kaimanawa
NU_057_1	This Study	-	Crown	Tb-o	-	Tb-oB3b1	Kaimanawa
GA_042_1	This Study	-	Crown	Tb-o	-	Tb-oB3b1	Kaimanawa
AL_033_1	This Study	-	Crown	Tb-o	-	Tb-oB3b1	Kaimanawa
KO_017_1	This Study	-	Crown	Tb-o	-	Tb-oB3b1	Kaimanawa
TB_014_1	This Study	-	Crown	Tb-o	-	Tb-oB3b1	Kaimanawa
AR_100_1	This Study	-	Crown	Tb-o	-	Tb-oB3b1	Kaimanawa
CO_081_1	This Study	-	Crown	Tb-o	-	Tb-oB3b1	Kaimanawa
DD_088_1	This Study	-	Crown	Tb-o	-	Tb-oB3b1	Kaimanawa
PH_072_1	This Study	-	Crown	Tb-o	-	Tb-oB3b1	Kaimanawa
SH_044_1	This Study	-	Crown	Tb-d	-	Tb-dW	Kaimanawa
DC1000263	This Study	-	Crown	Tb-d	-	Td-dm	Kaimanawa
PRZ4	Remer et al. 2022	SAMEA3498585	Not Crown	P	P	P	Przewalski's horse
Foal2	Remer et al. 2022	SAMN07570049	Not Crown	N	N	N	Shetland Pony
IceAnd	Remer et al. 2022	SAMN06028143	Not Crown	I	I	I	Icelandic horse
CON15	Remer et al. 2022	SAMN03291442	Crown	Ad-b	Ad-bA1	Ad-b	Connemara Pony
CON3	Remer et al. 2022	SAMN03291441	Crown	Ad-b	Ad-bA1a	Ad-b	Connemara Pony
K98037	Remer et al. 2022	SAMN23802975	Crown	Ad-b	Ad-bN1	Ad-b	Kladruber
YAK1	Remer et al. 2022	SAMEA3542237	Crown	Ad-h	Ad-hA	Ad-h	Yakutian Horse
65666	Remer et al. 2022	SAMN06017477	Crown	Ad-h	Ad-hA1	Ad-hA1	Southgerman Coldblood
BW-350	Remer et al. 2022	SAMN07570004	Crown	Ad-h	Ad-hA1	Ad-hA1	Noriker
Y_PR_14_011	Remer et al. 2022	SAMN23802976	Crown	Ad-h	Ad-hA1	Ad-hA1	Barb
Y_PR_09_032	Remer et al. 2022	SAMN23802977	Crown	Ad-h	Ad-hA1a	Ad-hA1	Rhenish German Coldblood
BW-347	Remer et al. 2022	SAMN07570002	Crown	Ad-h	Ad-hB	Ad-hB	Noriker
Y_PR_07_017	Remer et al. 2022	SAMN23802978	Crown	Ad-h	Ad-hB	Ad-hB	Noriker
BW-355	Remer et al. 2022	SAMN07570009	Crown	Ad-h	Ad-hC	Ad-h	Haflinger
BW-357	Remer et al. 2022	SAMN07570010	Crown	Ad-h	Ad-hC	Ad-h	Haflinger
BW-374	Remer et al. 2022	SAMN23802979	Crown	Ad-h	Ad-hC	Ad-h	Haflinger
ECA100	Remer et al. 2022	SAMN07570012	Crown	Ad-h	Ad-hC	Ad-h	Haflinger
Y_PR_06_080	Remer et al. 2022	SAMN23802980	Crown	Ad-h	Ad-hC	Ad-h	Haflinger
ECA105	Remer et al. 2022	SAMN07570011	Crown	Ad-h	Ad-hC	Ad-h	Haflinger
BW-377	Remer et al. 2022	SAMN23802981	Crown	Ad-h	Ad-hC1	Ad-h	Haflinger
Y_PR_14_016	Remer et al. 2022	SAMN23802982	Crown	Am	Am-a	Am	Barb
March	Remer et al. 2022	SAMEA3504078	Crown	Am	Am-sA1	Am	Mangalarga Marchador
TRA02	Remer et al. 2022	SAMN06017576	Crown	Ao-aA	Ao-aA1b	Ao-aA1b	Trakehner
W98040	Remer et al. 2022	SAMN23802984	Crown	Ao-aA	Ao-aA1a2a	Ao-aA1a	Lipizzaner
S97077	Remer et al. 2022	SAMN23802985	Crown	Ao-aA	Ao-aA1a2a1a	Ao-aA1a	Lipizzaner
TRA01	Remer et al. 2022	SAMN06017555	Crown	Ao-aA	Ao-aA1a4	Ao-aA1a	Trakehner
Y_PR_05_067	Remer et al. 2022	SAMN23802986	Crown	Ao-aA	Ao-aA1a3	Ao-aA1a	Partbred Arabian
Y_PR_05_108	Remer et al. 2022	SAMN23802983	Crown	Ao-aA	Ao-aA1a1a	Ao-aA1a1	Arabian
K744	Remer et al. 2022	SAMN02439777	Crown	Ao-aA	Ao-aA1a1b	Ao-aA1a1	Arabian
Y_PR_05_069	Remer et al. 2022	SAMN23802987	Crown	Ao-aA	Ao-aA1a5	Ao-aA1a	Shagya Arabian
Y_PR_06_072	Remer et al. 2022	SAMN23802988	Crown	Ao-aA	Ao-aA2	Ao-aA	Haflinger
BW-365	Remer et al. 2022	SAMN23802989	Crown	Ao-aA	Ao-aA3	Ao-aA	Barb
NGS27-29	Remer et al. 2022	SAMN08116964	Crown	Ao-aD	Ao-aD1	Ao-aD	Duelmen Pony
Y_PR_05_127	Remer et al. 2022	SAMN23802990	Crown	Ao-aD	Ao-aD2	Ao-aD2	Arabian
Marw	Remer et al. 2022	SAMN02767683	Crown	Ao-aM	Ao-aM	Ao-aM	Marwari horse
K98031	Remer et al. 2022	SAMN23802996	Crown	Ao-n	Ao-nM2	Ao-nM	Kladruber
BW-348	Remer et al. 2022	SAMN07570003	Crown	Ao-n	Ao-nM1b	Ao-nM1b	Noriker
Y_PR_07_078	Remer et al. 2022	SAMN23802995	Crown	Ao-n	Ao-nM1b2	Ao-nM1b2	Noriker
Y_PR_07_228	Remer et al. 2022	SAMN23802994	Crown	Ao-n	Ao-nM1b2	Ao-nM1b2	Noriker
BW-349	Remer et al. 2022	SAMN07570005	Crown	Ao-n	Ao-nM1b2	Ao-nM1b2	Noriker
BW-351	Remer et al. 2022	SAMN07570006	Crown	Ao-n	Ao-nM1b2a	Ao-nM1b2	Noriker
Y_PR_06_005	Remer et al. 2022	SAMN23802992	Crown	Ao-n	Ao-nM1b1	Ao-nM1b	Haflinger
Y_PR_06_024	Remer et al. 2022	SAMN23802993	Crown	Ao-n	Ao-nM1b1	Ao-nM1b	Haflinger
BW-352	Remer et al. 2022	SAMN07570007	Crown	Ao-n	Ao-nM1b3	Ao-nM1b	Noriker
BW-354	Remer et al. 2022	SAMN07570008	Crown	Ao-n	Ao-nM1b3	Ao-nM1b	Noriker
Y_PR_14_022	Remer et al. 2022	SAMN23802991	Crown	Ao-n	Ao-nM1a	Ao-nM1	Arab Barb
Chakouyi	Remer et al. 2022	SAMEA3504070	Crown	Hc	Hc	Hc	Chakouyi Horse
Lip113	Remer et al. 2022	SAMN06017258	Crown	Hs	Hs-aA	Hs-aA	Lipizzaner
Lip111	Remer et al. 2022	SAMN06017257	Crown	Hs	Hs-aA	Hs-aA	Lipizzaner
S97042	Remer et al. 2022	SAMN23802997	Crown	Hs	Hs-aA1	Hs-aA	Lipizzaner
K745	Remer et al. 2022	SAMN02439778	Crown	Hs	Hs-aB	Hs-aB	Sorraia Horse
NGS030	Remer et al. 2022	SAMN08287594	Crown	Hs	Hs-bL	Hs	Barb
Y_PR_14_083	Remer et al. 2022	SAMN23802998	Crown	Hs	Hs-bL1	Hs	Lusitano
K98002	Remer et al. 2022	SAMN23803013	Crown	Tk	Tk	No Haplotype defining SNPs in our data	Kladruber
Arab	Remer et al. 2022	SAMEA3475296	Crown	Ta	Ta-a	Ta	Arabian
Y_PR_05_066	Remer et al. 2022	SAMN23802999	Crown	Ta	Ta-b	Ta	Shagya Arabian
BW-380	Remer et al. 2022	SAMN23803000	Crown	Ta	Ta-bA	Ta	Arabian
FM0334	Remer et al. 2022	SAMEA4075248	Crown	Tu	Tu	Tu	Franches Montagnes
FM1951	Remer et al. 2022	SAMEA3498894	Crown	Tu	Tu	Tu	Franches Montagnes
FM2001	Remer et al. 2022	SAMEA2445337	Crown	Tu	Tu-a	Tu	Franches Montagnes
FM2218	Remer et al. 2022	SAMEA3498891	Crown	Tu	Tu-bA	Tu	Franches Montagnes
FM1625	Remer et al. 2022	SAMN07570019	Crown	Tu	Tu-bA	Tu	Franches Montagnes
FM1041	Remer et al. 2022	SAMEA3498893	Crown	Tu	Tu	Tu	Franches Montagnes
FM1176	Remer et al. 2022	SAMEA4075253	Crown	Tu	Tu	Tu	Franches Montagnes
FM0512	Remer et al. 2022	SAMEA4075249	Crown	Tu	Tu-bA	Tu	Franches Montagnes
FM0570	Remer et al. 2022	SAMEA4075250	Crown	Tu	Tu-d	Tu	Franches Montagnes
FM1030	Remer et al. 2022	SAMEA3498898	Crown	Tu	Tu	Tu	Franches Montagnes
FM0431	Remer et al. 2022	SAMN07570013	Crown	Tu	Tu-c	Tu-c	Franches Montagnes
FM0450	Remer et al. 2022	SAMEA3498899	Crown	Tu	Tu-b	Tu	Franches Montagnes
S97074	Remer et al. 2022	SAMN23803003	Crown	Tb-o	Tb-oB	Tb-o	Lipizzaner
Y_PR_11_033	Remer et al. 2022	SAMN23803004	Crown	Tb-o	Tb-oB1	Tb-o	Thoroughbred
RAO441	Remer et al. 2022	SAMN06030885	Crown	Tb-o	Tb-oB1	Tb-o	Swiss Warmblood
BY01	Remer et al. 2022	SAMN06017548	Crown	Tb-o	Tb-oB1a	Tb-o	Bavarian Warmblood
FM1178	Remer et al. 2022	SAMEA4075254	Crown	Tb-o	Tb-oB1b	Tb-oB1b	Franches Montagnes
FM1785	Remer et al. 2022	SAMEA3498897	Crown	Tb-o	Tb-oB1b	Tb-oB1b	Franches Montagnes
FM1932	Remer et al. 2022	SAMEA3498889	Crown	Tb-o	Tb-oB1b	Tb-oB1b	Franches Montagnes
NGS043	Remer et al. 2022	SAMN08116965	Crown	Tb-o	Tb-oB1b	Tb-oB1b	Hanoverian Warmblood
NGS052	Remer et al. 2022	SAMN08116988	Crown	Tb-o	Tb-oB1b	Tb-oB1b	Hanoverian Warmblood
P1	Remer et al. 2022	SAMN06017554	Crown	Tb-o	Tb-oB1b	Tb-oB1b	Holsteiner Warmblood
OLD02	Remer et al. 2022	SAMN06017553	Crown	Tb-o	Tb-oB1c	Tb-oB1c	Oldenburg Warmblood
EMS49	Remer et al. 2022	SAMN06028145	Crown	Tb-o	Tb-oB2a	Tb-oB2	Morgan Horse
EMS50	Remer et al. 2022	SAMN06030891	Crown	Tb-o	Tb-oB2a	Tb-oB2	Morgan Horse
EMS93	Remer et al. 2022	SAMN06030902	Crown	Tb-o	Tb-oB2b1	Tb-oB2b1	Morgan Horse
EMS355	Remer et al. 2022	SAMN06028146	Crown	Tb-o	Tb-oB2b2	Tb-oB2b	Morgan Horse
AKT001	Remer et al. 2022	SAMEA4075241	Crown	Tb-o	Tb-oB3a	Tb-oB3	Akhal Theke
AKT004	Remer et al. 2022	SAMEA4075243	Crown	Tb-o	Tb-oB3a	Tb-oB3	Akhal Theke
AKT006	Remer et al. 2022	SAMEA4075244	Crown	Tb-o	Tb-oB3a	Tb-oB3	Akhal Theke
A2071	Remer et al. 2022	SAMN06030887	Crown	Tb-o	Tb-oB3b	Tb-oB3b	Quarter Horse
FM1435	Remer et al. 2022	SAMEA4075258	Crown	Tb-o	Tb-oB3b1a	Tb-oB3b1	Franches Montagnes
FM1948	Remer et al. 2022	SAMEA3498890	Crown	Tb-o	Tb-oB3b1a1	Tb-oB3b1	Franches Montagnes
Y_PR_14_080	Remer et al. 2022	SAMN23803005	Crown	Tb-o	Tb-oB3b1b1	Tb-oB3b1b	Barb
EGR1583	Remer et al. 2022	SAMN08389297	Crown	Tb-o	Tb-oB3b1b2	Tb-oB3b1b	Thoroughbred
WF02	Remer et al. 2022	SAMN06017631	Crown	Tb-o	Tb-oB3b1b1a	Tb-oB3b1b1a	Westphalian Warmblood
163	Remer et al. 2022	SAMN07570001	Crown	Tb-o	Tb-oB3b1b2	Tb-oB3b1b	Swedish Warmblood
325	Remer et al. 2022	SAMN07570000	Crown	Tb-o	Tb-oB3b1b2	Tb-oB3b1b	Swedish Warmblood
NGS051	Remer et al. 2022	SAMN08116989	Crown	Tb-o	Tb-oB3b1b1a	Tb-oB3b1b1a	Hanoverian Warmblood
NGS053	Remer et al. 2022	SAMN08116991	Crown	Tb-o	Tb-oB3b1b1a	Tb-oB3b1b1a	Hanoverian Warmblood
NGS056	Remer et al. 2022	SAMN08116992	Crown	Tb-o	Tb-oB3b1b1	Tb-oB3b1b	Hanoverian Warmblood
HAN01	Remer et al. 2022	SAMN06017549	Crown	Tb-o	Tb-oB3b1c	Tb-oB3b1c	Hanoverian Warmblood
K746	Remer et al. 2022	SAMN02439782	Crown	Tb-o	Tb-oB3b1c	Tb-oB3b1c	Hanoverian Warmblood
W98053	Remer et al. 2022	SAMN23803006	Crown	Tb-o	Tb-oB4	Tb-o	Lipizzaner
F97002	Remer et al. 2022	SAMN23803007	Crown	Tb-o	Tb-oB4a	Tb-o	Lipizzaner
R98008	Remer et al. 2022	SAMN23803008	Crown	Tb-o	Tb-oB4b	Tb-o	Lipizzaner
W98004	Remer et al. 2022	SAMN23803009	Crown	Tb-o	Tb-oB4b	Tb-o	Lipizzaner
F97001	Remer et al. 2022	SAMN23803010	Crown	Tb-o	Tb-oL	Tb-oL	Lipizzaner
W98032	Remer et al. 2022	SAMN23803012	Crown	Tb-o	Tb-oL2	Tb-oL	Lipizzaner
Lip169	Remer et al. 2022	SAMN06017259	Crown	Tb-o	Tb-oL1a	Tb-oL1	Lipizzaner
W98065	Remer et al. 2022	SAMN23803011	Crown	Tb-o	Tb-oL1b	Tb-oL1	Lipizzaner
EMS91	Remer et al. 2022	SAMN06030899	Crown	Tb-d	Tb-dM	Tb-dM	Morgan Horse
M5304	Remer et al. 2022	SAMN06033614	Crown	Tb-d	Tb-dM	Tb-dM	Standardbred
EMS246	Remer et al. 2022	SAMN06030903	Crown	Tb-d	Tb-dM	Tb-dM	Morgan Horse
M1005	Remer et al. 2022	SAMN06030925	Crown	Tb-d	Tb-dM	Tb-dM	Standardbred
M1012	Remer et al. 2022	SAMN06030942	Crown	Tb-d	Tb-dM	Tb-dM	Standardbred
M1027	Remer et al. 2022	SAMN06028147	Crown	Tb-d	Tb-dM	Tb-dM	Standardbred
M1048	Remer et al. 2022	SAMN06033611	Crown	Tb-d	Tb-dM	Tb-dM	Standardbred
M968	Remer et al. 2022	SAMN06030904	Crown	Tb-d	Tb-dM	Tb-dM	Standardbred
M992	Remer et al. 2022	SAMN06030905	Crown	Tb-d	Tb-dM	Tb-dM	Standardbred
Tenn	Remer et al. 2022	SAMEA3475316	Crown	Tb-d	Tb-dM1	Tb-dM	Tennessee Walking Horse
K747	Remer et al. 2022	SAMN02439779	Crown	Tb-d	Tb-dW1	Tb-dW	Hanoverian Warmblood
M1506	Remer et al. 2022	SAMN08389305	Crown	Tb-d	Tb-dW1	Tb-dW	Thoroughbred
M1516	Remer et al. 2022	SAMN08389310	Crown	Tb-d	Tb-dW1	Tb-dW	Thoroughbred
M1555	Remer et al. 2022	SAMN08389311	Crown	Tb-d	Tb-dW1	Tb-dW	Thoroughbred
M4513	Remer et al. 2022	SAMN06033616	Crown	Tb-d	Tb-dW1	Tb-dW	Quarter Horse
M4514	Remer et al. 2022	SAMN06033617	Crown	Tb-d	Tb-dW1	Tb-dW	Quarter Horse
M4527	Remer et al. 2022	SAMN06033613	Crown	Tb-d	Tb-dW1	Tb-dW	Quarter Horse
NGS044	Remer et al. 2022	SAMN08116967	Crown	Tb-d	Tb-dW1	Tb-dW	Hanoverian Warmblood
NGS047	Remer et al. 2022	SAMN08116971	Crown	Tb-d	Tb-dW1	Tb-dW	Hanoverian Warmblood
NGS048	Remer et al. 2022	SAMN08116972	Crown	Tb-d	Tb-dW1	Tb-dW	Hanoverian Warmblood
NGS050	Remer et al. 2022	SAMN08116973	Crown	Tb-d	Tb-dW1	Tb-dW	Hanoverian Warmblood
NGS055	Remer et al. 2022	SAMN08116993	Crown	Tb-d	Tb-dW1	Tb-dW	Hanoverian Warmblood
OLD01	Remer et al. 2022	SAMN06017552	Crown	Tb-d	Tb-dW1	Tb-dW	Oldenburg Warmblood
EGR230	Remer et al. 2022	SAMN08389300	Crown	Tb-d	Tb-dW1a	Tb-dW	Thoroughbred
EGR943	Remer et al. 2022	SAMN08389301	Crown	Tb-d	Tb-dW1a	Tb-dW	Thoroughbred
M1503	Remer et al. 2022	SAMN08389303	Crown	Tb-d	Tb-dW1a	Tb-dW	Thoroughbred
M1507	Remer et al. 2022	SAMN08389306	Crown	Tb-d	Tb-dW1a	Tb-dW	Thoroughbred
M1510	Remer et al. 2022	SAMN08389308	Crown	Tb-d	Tb-dW1a	Tb-dW	Thoroughbred
M1514	Remer et al. 2022	SAMN08389309	Crown	Tb-d	Tb-dW1a	Tb-dW	Thoroughbred
NGS057	Remer et al. 2022	SAMN08116995	Crown	Tb-d	Tb-dW1b	Tb-dW	Hanoverian Warmblood
A2068	Remer et al. 2022	SAMN06030886	Crown	Tb-d	Tb-dW1c	Tb-dW1c	Quarter Horse
M4467	Remer et al. 2022	SAMN06033612	Crown	Tb-d	Tb-dW1c	Tb-dW1c	Quarter Horse
M4476	Remer et al. 2022	SAMN06033615	Crown	Tb-d	Tb-dW1c	Tb-dW1c	Quarter Horse
NGS045	Remer et al. 2022	SAMN08116969	Crown	Tb-d	Tb-dW1c	Tb-dW1c	Thoroughbred
NGS046	Remer et al. 2022	SAMN08116970	Crown	Tb-d	Tb-dW1c	Tb-dW1c	Hanoverian Warmblood
HOL01	Remer et al. 2022	SAMN06017550	Crown	Tb-d	Tb-dW1c1	Tb-dW1c1	Holsteiner Warmblood
HOL02	Remer et al. 2022	SAMN06017551	Crown	Tb-d	Tb-dW1c2	Tb-dW1c2	Holsteiner Warmblood
WF01	Remer et al. 2022	SAMN06017577	Crown	Tb-d	Tb-dW1c2	Tb-dW1c2	Westphalian Warmblood
BW01	Remer et al. 2022	SAMN06017547	Crown	Tb-d	Tb-dW1c3	Tb-dW1c3	Baden Wuerttemberg Warmblood
A2085	Remer et al. 2022	SAMN06028144	Crown	Tb-d	Tb-dW1d	Tb-dW1d	Quarter Horse
RAO310	Remer et al. 2022	SAMN06017546	Crown	Tb-d	Tb-dW1e	Tb-dW	Swiss Warmblood
NGS049	Remer et al. 2022	SAMN08116987	Crown	Tb-d	Tb-dW1f	Tb-dW	Hanoverian Warmblood
NGS054	Remer et al. 2022	SAMN08116990	Crown	Tb-d	Tb-dW1f	Tb-dW	Hanoverian Warmblood
FM0238	Remer et al. 2022	SAMEA4075247	Crown	Tb-d	Tb-dW2a	Tb-dW2a	Franches Montagnes
FM0474	Remer et al. 2022	SAMEA4075265	Crown	Tb-d	Tb-dW2a	Tb-dW2a	Franches Montagnes
FM1190	Remer et al. 2022	SAMEA3498892	Crown	Tb-d	Tb-dW2a	Tb-dW2a	Franches Montagnes
FM0467	Remer et al. 2022	SAMEA3498895	Crown	Tb-d	Tb-dW2a1	Tb-dW2a	Franches Montagnes
D97048	Remer et al. 2022	SAMN23803001	Crown	Tb-d	Tb-dW3a	Tb-dW	Lipizzaner
AV-34	Remer et al. 2022	SAMN23803002	Crown	Tb-d	Tb-dW4	Tb-dW	Quarter Horse

## Sheet: S8_Y-chr_Exp
Table S8: KASP Experimental setup used for genotyping five MSY variants in KHs
KASP_BS001_202204xx
	Stock	Final		Component	x 1	x n	Assay_1	Assay_2	Assay_3	Assay_4
						64	32	32	8	8
				DNA	3	192			24	24
				2xKASP	3	192	96	96	24	24
				KASPassaymix	0.084	5.376	2.688	2.688	0.672	0.672
				EV	6.084
									SNP_Allele1_FAM	SNP_Allele2_HEX
					aliquot	3.084		rAF	rAF_G_0	rAF_A_1
								rDT	rDT_T_0	rDT_C_1
	PCR conditions:					read step		qCR	qCR_T_0	qCR_C_1
	94°C	94°C	61°C -0,6/cycle	94°C	55°C	37°C		qW	qW_C_0	qW_T_1
	15 min	20 sec	1 min	20 sec	1 min	1 min
			10x		27x				Fam_Ko	Hex_ko
								rAF	H,T	Ad
								rDT	H,T	Ad-b
								qCR	H,T	Ao-aD
								qW	H,T	Ao-aD2
	Assay_1				Assay_2				Assay_3		Assay_4
	rAF				rDT				qCR		qW
	1	2	3	4	1	2	3	4	1	2	1	2
A	BE_052_1	GA_093_1	LE_050_1	Ad	BE_052_1	GA_093_1	LE_050_1	Ad-b	EL_030_1	Ao-aD	EL_030_1	Ao-aD2
B	TA_002_1	SE_080_1	ZO_046_1	Ad	TA_002_1	SE_080_1	ZO_046_1	Ad-b	PO_007_1	Ao-aD	PO_007_1	Ao-aD2
C	RO_073_1	ST_079_1	BR_107_1	H	RO_073_1	ST_079_1	BR_107_1	H	BH_008_1	H	BH_008_1	H
D	RA_059_1	EC_076_1	DC1000267	T	RA_059_1	EC_076_1	DC1000267	T	CA_031_1	T	CA_031_1	T
E	CA_015_1	PA_032_1	RO_102_1	Female	CA_015_1	PA_032_1	RO_102_1	Female	DE_036_1	Female	DE_036_1	Female
F	TE_011_1	KO_038_1	FL_041_1	NTC	TE_011_1	KO_038_1	FL_041_1	NTC	CH_009_1	NTC	CH_009_1	NTC
G	AR_010_1	TB_037_1	BR_097_1	NTC	AR_010_1	TB_037_1	BR_097_1	NTC	BR_110_1	NTC	BR_110_1	NTC
H	HE_061_1	MU_034_1	CR_064_1		HE_061_1	MU_034_1	CR_064_1		BE_101_1		BE_101_1
KASP_L143_20220428
	Stock	Final		Component	x 1	x n	qCU				SNP_Allele1_FAM	SNP_Allele2_HEX
							20			qCU	qCU_T_0	qCU_A_1
				DNA	3	0
				2xKASP	3	0	60
				KASPassaymix	0.084	0	1.68				Fam_Ko	Hex_ko
				EV	6.084					qCU	H,T	Am
					aliquot	3.084
									Assay_5
	PCR conditions:					read step			qCU
	94°C	94°C	61°C -0,6/cycle	94°C	55°C	37°C			1	2
	15 min	20 sec	1 min	20 sec	1 min	1 min		A	DC1000267	Am
			10x		27x			B	-	H
								C	-	T
								D	-	Female 1
								E	-	Female 2
								F	-	NTC
								G	-	NTC
								H	Am

## Sheet: S9_Y-chr-KASP_Results
Table S9: Cluster plots for the five MSY variants genotyped using Bio-Rad CFX Manager 3.1
rAF
Well	Sample	Call	Type	RFU1	RFU2								File Name	KASP_BS001_20220411.pcrd
G01	AR-010-1	Allele 2	Auto	3732.41	4567.3								Created By User	admin
A01	BE-052-1	Allele 2	Auto	3842.95	4076.28								Notes
G03	BR-097-1	Allele 2	Auto	3763.76	4675.04								ID
C03	BR-107-1	Allele 2	Auto	3792.43	4407.27								Run Started	04/11/2022 10:07:11 UTC
E01	CA-015-1	Allele 2	Auto	3801.36	4599.18								Run Ended	04/11/2022 11:41:31 UTC
H03	CR-064-1	Allele 2	Auto	3691.38	4477.42								Sample Vol	6
D03	DC1000267	Allele 1	Auto	6294.18	3333.28								Lid Temp	105
D02	EC-076-1	Allele 2	Auto	3823.83	4661.11								Protocol File Name	Kasp_plus_3.prcl
F03	FL-041-1	Allele 2	Auto	3791.02	4692.33								Plate Setup File Name	BS001.pltd
A02	GA-093-1	Allele 2	Auto	3836.94	4675.43								Base Serial Number	CT015406
H01	HE-061-1	Allele 2	Auto	3697.54	4501.51								Optical Head Serial Number	785BR11361
F02	KO-038-1	Allele 2	Auto	3794.47	4697.21								CFX Manager Version	3.1.1517.0823.
A03	LE-050-1	Allele 2	Auto	3878.07	4018.46
H02	MU-034-1	Allele 2	Auto	3665.93	4306.31
E02	PA-032-1	Allele 2	Auto	3785.14	4642.3
D01	RA-059-1	Allele 2	Auto	3794	4593.8
C01	RO-073-1	Allele 2	Auto	3668.45	4173.63
E03	RO-102-1	Allele 2	Auto	3787.64	4657.73
B02	SE-080-1	Allele 2	Auto	3876.4	4588.38
C02	ST-079-1	Allele 2	Auto	3810.75	4495.91
B01	TA-002-1	Allele 2	Auto	3666.43	4214.8
G02	TB-037-1	Allele 2	Auto	3794.66	4549.05
F01	TE-011-1	Allele 2	Auto	3730.76	4650.83
B03	ZO-046-1	Allele 2	Auto	3753.6	4436.2
A04	Ad	No Call	Auto	3666.73	3367.81
B04	Ad	Allele 2	Auto	3857.18	4702.37
C04	H	Allele 1	Auto	6263.26	3297.86
D04	T	Allele 1	Auto	6171.15	3281.34
E04	Female	No Call	Auto	3706.13	3043.77
F04	NTC	No Call	Auto	3715.64	3116.17
G04	NTC	No Call	Auto	3697.33	3121.86
rDT
Well	Sample	Call	Type	RFU1	RFU2								File Name	KASP_BS001_20220411.pcrd
G05	AR-010-1	Allele 2	Auto	3654.86	4874.79								Created By User	admin
A05	BE-052-1	Allele 2	Auto	3687.03	4132.18								Notes
G07	BR-097-1	Allele 2	Auto	3762.34	3795.14								ID
C07	BR-107-1	Allele 2	Auto	3782.23	4915.76								Run Started	04/11/2022 10:07:11 UTC
E05	CA-015-1	Allele 2	Auto	3796.81	5095.19								Run Ended	04/11/2022 11:41:31 UTC
H07	CR-064-1	Allele 2	Auto	3588.1	4561.98								Sample Vol	6
D07	DC1000267	Allele 1	Auto	5956.03	3210.42								Lid Temp	105
D06	EC-076-1	Allele 2	Auto	3768.48	4956.74								Protocol File Name	Kasp_plus_3.prcl
F07	FL-041-1	Allele 2	Auto	3734.65	4664.3								Plate Setup File Name	BS001.pltd
A06	GA-093-1	Allele 2	Auto	3747.37	4731.4								Base Serial Number	CT015406
H05	HE-061-1	Allele 2	Auto	3611.58	4637.56								Optical Head Serial Number	785BR11361
F06	KO-038-1	Allele 2	Auto	3722.08	4911.23								CFX Manager Version	3.1.1517.0823.
A07	LE-050-1	Allele 2	Auto	3741.93	4326.59
H06	MU-034-1	Allele 2	Auto	3603.38	4571.49
E06	PA-032-1	Allele 2	Auto	3744.98	5069.71
D05	RA-059-1	Allele 2	Auto	3730.01	5079.25
C05	RO-073-1	Allele 2	Auto	3502.77	4030.11
E07	RO-102-1	Allele 2	Auto	3685.24	4609.61
B06	SE-080-1	Allele 2	Auto	3770.6	4851.12
C06	ST-079-1	Allele 2	Auto	3728.13	4635.49
B05	TA-002-1	Allele 2	Auto	3608.07	4411.64
G06	TB-037-1	Allele 2	Auto	3691.63	4868.83
F05	TE-011-1	Allele 2	Auto	3684.03	4848.85
B07	ZO-046-1	Allele 2	Auto	3743.44	4770.29
A08	Ad-b	Allele 2	Auto	3777.54	3481.5
B08	Ad-b	Allele 2	Auto	3778.14	4766.55
C08	H	Allele 1	Auto	5985.19	3211.02
D08	T	Allele 1	Auto	6026.15	3267.75
E08	Female	No Call	Auto	3726.57	3063.8
F08	NTC	No Call	Auto	3751.52	3153.34
G08	NTC	No Call	Auto	3726.22	3121.41
qCR
Well	Sample	Call	Type	RFU1	RFU2								File Name	KASP_BS001_20220411.pcrd
H09	BE-101-1	Allele 2	Auto	3653.63	4292.95								Created By User	admin
C09	BH-008-1	Allele 2	Auto	4078.24	4658.32								Notes
G09	BR-110-1	Allele 2	Auto	4049.33	4710.98								ID
D09	CA-031-1	Allele 2	Auto	3924.05	4523.54								Run Started	04/11/2022 10:07:11 UTC
F09	CH-009-1	Allele 2	Auto	4066.55	4803.69								Run Ended	04/11/2022 11:41:31 UTC
E09	DE-036-1	Allele 2	Auto	4033.95	4770.92								Sample Vol	6
A09	EL-030-1	Allele 2	Auto	3836.09	4396.96								Lid Temp	105
B09	PO-007-1	Allele 2	Auto	4126.94	4736.53								Protocol File Name	Kasp_plus_3.prcl
A10	Ao-aD	Allele 2	Auto	3787.83	4563.59								Plate Setup File Name	BS001.pltd
B10	Ao-aD	Allele 2	Auto	3798.92	4703.75								Base Serial Number	CT015406
C10	H	Allele 1	Auto	6262.61	3243.41								Optical Head Serial Number	785BR11361
D10	T	Allele 1	Auto	6163.25	3230.65								CFX Manager Version	3.1.1517.0823.
E10	Female	No Call	Auto	3673.28	3085.05
F10	NTC	No Call	Auto	3668.94	3123.28
G10	NTC	No Call	Auto	3637.59	3005.92
qW
Well	Sample	Call	Type	RFU1	RFU2								File Name	KASP_BS001_20220411.pcrd
H11	BE-101-1	Allele 2	Auto	3846.59	4680.11								Created By User	admin
C11	BH-008-1	Allele 2	Auto	3982.46	4714.72								Notes
G11	BR-110-1	Allele 2	Auto	3951.35	4877.07								ID
D11	CA-031-1	Allele 2	Auto	3804.13	4570.14								Run Started	04/11/2022 10:07:11 UTC
F11	CH-009-1	Allele 2	Auto	3909.87	4729.4								Run Ended	04/11/2022 11:41:31 UTC
E11	DE-036-1	Allele 2	Auto	3846.85	4707.99								Sample Vol	6
A11	EL-030-1	Allele 2	Auto	3797.39	4456.54								Lid Temp	105
B11	PO-007-1	Allele 2	Auto	4008.76	4678.52								Protocol File Name	Kasp_plus_3.prcl
A12	Ao-aD2	Allele 2	Auto	3836.18	4694.74								Plate Setup File Name	BS001.pltd
B12	Ao-aD2	Allele 2	Auto	3794.62	4992.52								Base Serial Number	CT015406
C12	H	Allele 1	Auto	6295.89	3239.09								Optical Head Serial Number	785BR11361
D12	T	Allele 1	Auto	6237.93	3223.78								CFX Manager Version	3.1.1517.0823.
E12	Female	No Call	Auto	3741.44	3492.31
F12	NTC	No Call	Auto	3814.84	3531.65
G12	NTC	No Call	Auto	3658.16	3630.54
qCU
Well	Sample	Call	Type	RFU1	RFU2								File Name	KASP_L143_20220428recycle2.pcrd
A01	DC1000267	Allele 2	Auto	3744.35	3214.32								Created By User	admin
B02	H	Allele 1	Auto	5304.24	2586.8								Notes
C02	T	Allele 1	Auto	5723.51	2703.35								ID
D02	female	No Call	Auto	3582.68	2511.99								Run Started	04/28/2022 11:55:35 UTC
E02	female	No Call	Auto	3567.39	2438.22								Run Ended	04/28/2022 12:04:59 UTC
A02	Am	Allele 2	Auto	3694.27	3412.85								Sample Vol	6
H01	Am	Allele 2	Auto	3592.73	3381								Lid Temp	105
F02	NTC	No Call	Auto	4182.79	2502.06								Protocol File Name	Kasp recycling.prcl
B01	-	-	Auto	-	-								Plate Setup File Name	KASP_L143_20220428.pltd
C01	-	-	Auto	-	-								Base Serial Number	CT015405
D01	-	-	Auto	-	-								Optical Head Serial Number	785BR11318
E01	-	-	Auto	-	-								CFX Manager Version	3.1.1517.0823.
F01	-	-	Auto	-	-
G01	-	-	Auto	-	-

## Sheet: S10_mt_Y_HGs
Table S10: Summary of mtDNA and Y-chr HG affiliation in male KHs, including their age at the time of sampling (~2020)
Sample ID	Y-chr HPGs	mtDNA HPGs	Age in Years
TA_002_1	Ad-b	A	11
AR_010_1	Ad-b	G	16
TE_011_1	Ad-b	G	10
CA_015_1	Ad-b	G	11
MU_034_1	Ad-b	G	8
KO_038_1	Ad-b	G	2.1
FL_041_1	Ad-b	G	2
ZO_046_1	Ad-b	G	24
LE_050_1	Ad-b	G	1.9
RA_059_1	Ad-b	G	0.83
HE_061_1	Ad-b	G	2.67
RO_073_1	Ad-b	G	3.2
EC_076_1	Ad-b	G	15
ST_079_1	Ad-b	G	24
SE_080_1	Ad-b	G	24
GA_093_1	Ad-b	G	3
BR_097_1	Ad-b	G	20
RO_102_1	Ad-b	G	8.17
BR_107_1	Ad-b	G	12-13
DC1000267	Am	G	-
PA_032_1	Ad-b	P	2
TB_037_1	Ad-b	P	9
BE_052_1	Ad-b	P	15
CR_064_1	Ad-b	P	8
PO_007_1	Ao-aD2	G	7
BH_008_1	Ao-aD2	P	9
CH_009_1	Ao-aD2	P	8
EL_030_1	Ao-aD2	P	18-22
CA_031_1	Ao-aD2	P	13
DE_036_1	Ao-aD2	P	6
BE_101_1	Ao-aD2	P	15
BR_110_1	Ao-aD2	P	6
SH_044_1	Tb-dW	L	18
TB_014_1	Tb-oB3b1	G	19
AL_033_1	Tb-oB3b1	G	9
GA_042_1	Tb-oB3b1	G	14-16
NU_057_1	Tb-oB3b1	G	0.75
CO_081_1	Tb-oB3b1	G	24
AR_100_1	Tb-oB3b1	G	11
PH_072_1	Tb-oB3b1	N	16
KO_017_1	Tb-oB3b1	P	0.1
DD_088_1	Tb-oB3b1	P	2
DC1000263	Td-dm	G	-
AN_001_2	-	A	14
KI_065_2	-	B	20
BR_003_2	-	G	9
SG_005_2	-	G	13
SA_039_2	-	G	15
SU_040_2	-	G	3.1
AB_043_2	-	G	7
SM_045_2	-	G	20
KA_047_2	-	G	7.1
AU_049_2	-	G	4
RO_051_2	-	G	16
CA_054_2	-	G	4
PH_056_2	-	G	3.8
FI_062_2	-	G	10.75
KA_063_2	-	G	13.9
TR_066_2	-	G	9
PR_068_2	-	G	13-14
LI_075_2	-	G	28
LI_077_2	-	G	11
FO_082_2	-	G	23
BU_083_2	-	G	23
BL_086_2	-	G	40
MA_090_2	-	G	5
GY_094_2	-	G	14
SH_096_2	-	G	2
CI_098_2	-	G	13
EI_099_2	-	G	4.34
NG_103_2	-	G	6
LU_104_2	-	G	3.5
LP_109_2	-	G	12
CI_113_2	-	G	19
PE_114_2	-	G	24
MI_004_2	-	P	13
BO_006_2	-	P	13
BE_012_2	-	P	7
SP_013_2	-	P	3
FE_035_2	-	P	15
BE_053_2	-	P	2.25
AN_055_2	-	P	10
QU_067_2	-	P	14
MS_069_2	-	P	9
KH_070_2	-	P	17
GI_074_2	-	P	7.25
EL_078_2	-	P	14
RA_085_2	-	P	13-14
DR_087_2	-	P	5
GU_091_2	-	P	8
MI_106_2	-	P	1
PI_108_2	-	P	6.17
KY_112_2	-	P	4.5

[truncated: 1 more sheets: S11_HGs_coat_color]
